# Supplementary material for: A model for the distribution of daily number of births in obstetric clinics based on a descriptive retrospective study
Source: PubMed Central journal article supplement — BMJ Open. 2013 Aug 29;3(8):e002920. doi: 10.1136/bmjopen-2013-002920 (PMC3758974; doi:10.1136/bmjopen-2013-002920), 2013-08-29
Supplement: bmjopen-2013-002920.draft_revisions.pdf [file bmjopen-2013-002920.draft_revisions.pdf]

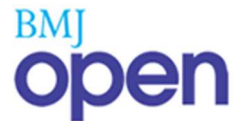

**A MODEL FOR THE DISTRIBUTION OF DAILY NUMBER OF BIRTHS IN OBSTETRIC CLINICS BASED ON A DESCRIPTIVE RETROSPECTIVE STUDY**

|                                 |                                                                                                                                                                                                                                                                                                                                                                                 |
|---------------------------------|---------------------------------------------------------------------------------------------------------------------------------------------------------------------------------------------------------------------------------------------------------------------------------------------------------------------------------------------------------------------------------|
| Journal:                        | <i>BMJ Open</i>                                                                                                                                                                                                                                                                                                                                                                 |
| Manuscript ID:                  | bmjopen-2013-002920                                                                                                                                                                                                                                                                                                                                                             |
| Article Type:                   | Research                                                                                                                                                                                                                                                                                                                                                                        |
| Date Submitted by the Author:   | 20-Mar-2013                                                                                                                                                                                                                                                                                                                                                                     |
| Complete List of Authors:       | Gam, Christiane; Hillerød Hospital, Copenhagen University Hospital, Department of Gynecology and Obstetrics<br>Tanniou, Julien; University of Copenhagen, Department of Biostatistics<br>Keiding, Niels; University of Copenhagen, Department of Biostatistics<br>Løkkegaard, Ellen; Hillerød Hospital, Copenhagen University Hospital, Department of Gynecology and Obstetrics |
| <b>Primary Subject Heading</b>: | Medical management                                                                                                                                                                                                                                                                                                                                                              |
| Secondary Subject Heading:      | Evidence based practice, Obstetrics and gynaecology                                                                                                                                                                                                                                                                                                                             |
| Keywords:                       | Human resource management < HEALTH SERVICES ADMINISTRATION & MANAGEMENT, Organisation of health services < HEALTH SERVICES ADMINISTRATION & MANAGEMENT, OBSTETRICS                                                                                                                                                                                                              |
|                                 |                                                                                                                                                                                                                                                                                                                                                                                 |

SCHOLARONE™  
Manuscripts

only

1  
2  
3 **A MODEL FOR THE DISTRIBUTION OF DAILY NUMBER OF BIRTHS IN OBSTETRIC CLINICS BASED ON A DESCRIPTIVE**  
4 **RETROSPECTIVE STUDY**  
5

6 Christiane M. B. Gam<sup>1</sup>, Julien Tanniou<sup>2</sup>, Niels Keiding<sup>2</sup> and Ellen L. Løkkegaard<sup>1</sup>  
7  
8  
9  
10  
11  
12  
13  
14  
15  
16  
17  
18  
19  
20  
21  
22  
23

24 **Contact information**

25 Christiane Marie Bourgin Gam, MD, Ph.D. fellow

26 Ellen Leth Løkkegaard, MD, Ph.D.

27 Department of Gynecology and Obstetrics, Hillerød Hospital<sup>1</sup>

28 Dyrehavevej 29

29 DK-3400 Hillerød

30 (+45) 40 74 13 39

31 [christiane.gam@sund.ku.dk](mailto:christiane.gam@sund.ku.dk)  
32  
33  
34  
35  
36  
37  
38

39 Niels Keiding, professor in biostatistics

40 Julien Tanniou, statistician, Ph.D. fellow

41 Department of Biostatistics, University of Copenhagen<sup>2</sup>

42 Øster Farimagsgade 5,

43 P.O.B. 2099

44 DK-1014 Copenhagen K  
45  
46  
47  
48  
49

50 **Keywords:** distribution, births, model, Poisson, manpower, obstetric clinic

51 **Word count:** 1787 words  
52  
53  
54  
55  
56  
57  
58  
59  
60

**ABSTRACT**

**Objective:** Does the Poisson distribution correspond precisely to actual random variation in the number of non-elective births for each fixed day of the week?

**Design:** A descriptive retrospective study.

**Setting:** All seven obstetric clinics in the Capital region of Denmark.

**Population:** All births in for each day in a 10 year period were extracted from the Danish Birth registry (n=211,290).

**Methods:** Simple descriptive plots and one-way analysis of variance were used to analyze the distribution of non-elective births for each day of the week.

**Main outcome measures:** After exclusion of elective Caesarean sections and births after induction of labor only 'non-elective' births (n=171,009) were included for the statistical analysis.

**Results:** The number of 'non-elective' births varies considerably over the days of the week and over the year for each obstetric clinic regardless of clinic size. However, for each fixed day of the week this variation is well described by a Poisson distribution, allowing simple prediction of the variability. For births at each fixed day of the week, the Poisson distribution is indistinguishable from a normal distribution.

**Conclusion:** We may estimate the variance from the mean as the Poisson distribution for these parameters is indistinguishable from a normal distribution. This model is suitable for planning of manpower in obstetric clinics and the model proposition is adequate to be used in smaller as well as larger clinics.

**ARTICLE SUMMARY**

**Article focus:** Does the Poisson distribution correspond precisely to actual random variation in the number of non-elective births for each fixed day of the week?

**Key Message box:**

- The Poisson distribution for 'non-elective' births is indistinguishable from a normal distribution.
- The Poisson distribution makes it easy to use for planning of manpower in obstetric clinics.
- The model is adequate for use in smaller as well as larger clinics and can be used in management of manpower in obstetric clinics.

**Strengths and limitations of this study:** The dataset contains quantitative data, but no qualitative data.

## INTRODUCTION

There is a structural reorganization of hospitals going on in Denmark implying larger but fewer hospitals. This applies also for the departments of Gynecology and Obstetrics as smaller departments are being merged resulting in fewer larger departments (1-3). The main motivation for these changes has been that larger departments would enhance the capacity and quality of patient treatment and additionally reduce the costs for staff at shifts. In Denmark the overall year to year variation in number of births at each department is centrally determined as each department of obstetrics - on an administrative level - is intended to have a given number of births. An interesting organizational feature in obstetrics is the inherent random variation in onset of spontaneous labor which makes it difficult to precisely plan the necessary number of staff at the obstetric clinics. The planning of manpower in these departments is to our knowledge not based on published methods.

Statistics on the number of births on each day for each department every year is available online from Statistics Denmark (4). These numbers indicate considerable day to day variation and week to week variation. The observation of a weekly cycle is in accordance with reports from other countries such as England, Wales, Australia, the United States, Israel and Norway (5-13) and interestingly it has also been shown that the variation depends on whether the Sabbath occurs on a Friday (14), a Saturday (5) or Sunday (6-13) . However these former studies included all births regardless of whether or not there had been an elective obstetric intervention. Potentially the week variation disappears when births resulting from an obstetric intervention are excluded from the data set. There is a long tradition of describing the variation in the daily demand for hospital beds by the Poisson distribution (15-17) sometimes based on queuing theory and with varying efforts at empirical verification. In her well-known textbook Kirkwood (18) used an apparently hypothetical example of manpower planning under uncertainty in the face of merging two obstetrical departments to illustrate the Poisson distribution. In this note we examine from a broad Danish experience how well this suggestion corresponds to actual random variation in the number of non-elective births for each fixed day of the week.

## MATERIAL AND METHODS

### *Data*

The number of births for each day in the period from the 1<sup>st</sup> of January 2000 until the 31<sup>st</sup> of December 2009 at each of the seven obstetric clinics in the capital region of Denmark, respectively Rigshospitalet, Frederiksberg, Glostrup, Gentofte, Herlev, Hvidovre and Hillerød, were extracted from the Danish Birth registry. These data cover over 99% of all births in the region, as a dwindling number of births takes place at home in Denmark. The data include information on whether vaginal births resulted from induction of birth or occurred spontaneously and whether Caesareans were classified as elective or acute. To only

1  
2  
3 consider variation in the 'non-elective' births potential, planned births (resulting from induced labors or  
4 elective Caesareans) were excluded.

### 6 ***Statistical methods***

7  
8 The strategy in this note is to exploit that for moderate and large mean values it is well known (and will be  
9 demonstrated in our graphs) that the Poisson distribution closely resembles a normal distribution with the  
10 same mean and variance. We can therefore reduce the statistical apparatus to simple analyses based on  
11 the normal distribution, here in particular one-way analyses of variance, available in all statistical packages;  
12 we used R. Since the Poisson distribution has variance identical to its mean, the criterion for Poisson  
13 distribution of births at a given day of the week could then be tested via comparison of the residual  
14 variance from the analysis of variance to the daily mean.  
15  
16  
17  
18

### 19 ***Details of ethics approval***

20 An ethical approval for this study was not required. The data used are available online in an anonymous  
21 form.  
22  
23  
24

## 25 **RESULTS**

26  
27 There were 211,290 births distributed on seven departments in the capital region of Denmark from the 1<sup>st</sup>  
28 of January 2000 until the 31<sup>st</sup> of December 2009. In order to exclude potential 'planned' births, births were  
29 subdivided into induced or spontaneous labor and elective and acute Caesareans (Table I). Births where the  
30 mode of delivery were an elective Caesarean (n=16,325 (7.73 %)) and births initiated by induction of labor  
31 (n=23,956 (11.34%)) were excluded from the data set, thus leaving a total of 171,009 (80.94%) spontaneous  
32 births and acute Caesareans, to be denoted 'non-elective' below.  
33  
34  
35  
36

37 As mentioned in the introduction a main problem in obstetrics management is the variation over days of  
38 the week. This variation is to a large degree a result of decisions by the obstetricians on how to distribute  
39 elective Caesareans and electively induced labor over the days of the week (6, 12). Various preliminary  
40 descriptive analyses of the data clearly indicated that such policies varied considerably over the ten years  
41 for each department and that the patterns were rather different between departments, however overall a  
42 mid-weekly peak in births remained even when 'planned' births were excluded. The staffing required to  
43 handle these 'elective births' is a consequence of management decisions, and we focus from now on how  
44 to dimension the 'non-elective' births. Because of the strong heterogeneity in the day-to-day pattern for  
45 several of the involved departments over the ten years under study, we performed a set of 70 one-way  
46 analyses of variance comparing the number of spontaneous births at each day of the week for each fixed  
47 combination of department (n=7) and year (n=10). The residual variances from these 70 analyses were  
48 compared to the annual mean number of births for each department. As seen in Figure I, the residual  
49  
50  
51  
52  
53  
54  
55  
56  
57  
58  
59  
60

1  
2  
3 variances were very close to the means, indicating a Poisson distribution of the variation in number of non-  
4 elective births for each day of the week around the yearly average for that day.

5  
6 To illustrate our findings three selected combinations of department and year, a small, medium and large  
7 clinic, were chosen. For each a histogram for each day of the week with fitted normal distribution and fitted  
8 Poisson distribution was produced (Figure II). It is seen that there is a nice fit throughout of the Poisson  
9 distributions, and also that they are very close to the normal distributions with the same variance. This  
10 means that calculations of the likely variation in number of non-elective births can be based on the normal  
11 distribution with variance given by the average number of non-elective births per day over the year.

12  
13 For example, if at a particular department in a particular year the mean number of non-elective births is 9,  
14 the residual variance is estimated as 9 and the standard deviation as the square root of 9, that is, 3. Assume  
15 that the mean number of non-elective births on Tuesdays for that department for that year is 10.5. In 95%  
16 of Tuesdays the actual number of non-elective births at that department will be in the interval:  
17  
18  
19  
20  
21

$$(10.5 - 3 \times 1.96, 10.5 + 3 \times 1.96) = (4.6, 17.4)$$

22  
23 while in 80% of Tuesdays there will be between  $10.5 - 3 \times 1.28 = 6.7$  and  $10.5 + 3 \times 1.28 = 14.3$  non-elective  
24 births.  
25  
26

27  
28 This model is suitable for planning of manpower in obstetric clinics and the model is adequate to be used in  
29 smaller as well as larger clinics (Figure I).  
30  
31  
32  
33  
34

### 35 DISCUSSION

36  
37 Management of manpower in obstetric clinics is a difficult task, due to the relatively unpredictable nature  
38 of labor onset. Nowadays many births are 'elective' births in the sense that elective Caesarean sections or  
39 medically induced labor governs the time of the week where the birth happens.

40  
41 It has been assumed that data over births fits a Poisson distribution on a day to day variation (13, 18), but  
42 suitable data on live births, including mode of delivery, from a larger population has not previously been  
43 studied, thus limiting the means of studying day to day variation (7, 13). Furthermore the impact of elective  
44 obstetric intervention on the distribution has not been considered in any of the previous studies addressing  
45 birth variation (5-14, 19).  
46  
47  
48  
49

50  
51 Interestingly we find that even with the exclusion of births where an obstetric intervention has occurred,  
52 the remaining data still show significant weekly variation with a mid-weekly peak. As such this variation  
53 might not only be ascribed to measurable obstetric interventions, but also less tangible practices, for  
54 instance the time of admittance of a woman in early stages of labor might depend on staff numbers which  
55  
56  
57  
58  
59  
60

1  
2  
3 vary during the week. Also traditional non-medical methods of starting labor (hot baths, sexual intercourse,  
4 etc.) might be less likely to be tried by mothers in the weekends (7).  
5

6 However regardless of any obstetric practices or mothers practice, we found that the distribution of the  
7 remaining 'non-elective' births for each day of the week, each year, and each department is still well  
8 approximated by a Poisson distribution, where the mean equals the variance. For the relevant parameter  
9 values, this Poisson distribution is indistinguishable from a normal distribution, where we then may  
10 estimate the variance from the mean. Therefore, no special statistical tables are necessary.  
11  
12  
13

#### 14 15 16 **CONCLUSIONS**

17 We may estimate the variance from the mean, as the Poisson distribution for these parameters is  
18 indistinguishable from a normal distribution. This model is suitable for planning of manpower in obstetric  
19 clinics and the model proposition is adequate to be used in smaller as well as larger clinics.  
20  
21  
22

#### 23 24 **COMPETING INTEREST**

25 All authors have completed the Unified Competing Interest form at  
26 [http://www.icmje.org/coi\\_disclosure.pdf](http://www.icmje.org/coi_disclosure.pdf) (available on request from the corresponding author) and  
27 declare: no support from any organization for the submitted work, no financial relationships with any  
28 organization that might have an interest in the submitted work in the previous three, no other relationships  
29 or activities that could appear to have influenced the submitted work.  
30  
31  
32

#### 33 34 **FUNDING**

35 This research received no specific grant from any funding agency in the public, commercial or not-for-profit  
36 sectors.  
37

#### 38 39 **CONTRIBUTION TO AUTHORSHIP**

40 CMG, NK, JT and EL have all been involved in the conception of this study. The statistical analysis has been  
41 carried out mainly by JT under the guidance of NK, EL and CMG. The writing of this article has been done by  
42 CMG, NK, JT and EL. Coordination of the correspondence between authors has been taken care of by CMG.  
43  
44

#### 45 46 **DATA SHARING**

47 The informal descriptive analyses and the formal two-way analyses of variances preceding and leading to  
48 the main analysis, a one-way analysis of variance comparing days of the week for each fixed combination of  
49 department (7) and year (10) described in the article are available on request to anyone from the  
50 corresponding author.  
51  
52  
53  
54  
55  
56  
57  
58  
59  
60

## REFERENCES

1. Sygehusfødsler og fødeafdelingernes størrelse 1982-2005. Nye tal fra Sundhedsstyrelsen [Hospital births and size at birth departments 1982-2005. New figures from the Danish Health and Medicines Authority]. Copenhagen. Danish Health and Medicines Authority; 2007. Available from: [http://www.sst.dk/publ/tidsskrifter/nyetal/pdf/2007/03\\_07.pdf](http://www.sst.dk/publ/tidsskrifter/nyetal/pdf/2007/03_07.pdf). Danish.
2. Sygehusbehandling og Beredskab. Specialevejledning for gynækologi og obstetrik [Hospital and Emergency Management. Guidelines for the speciality of gynecology and obstetrics] [database on the Internet]. Danish Health and Medicines Authority. 2011. Available from: [http://www.google.dk/url?sa=t&rct=j&q=&esrc=s&frm=1&source=web&cd=1&cad=rja&ved=0CC0QFjAA&url=http%3A%2F%2Fwww.sst.dk%2F~%2Fmedia%2FPlanlaegning%2520og%2520kvalitet%2FSpecialeplanlaegning%2FSpecialevejledninger\\_2010%2FSpecialevejledning\\_%2520gynaekologi\\_obstetrik.ashx&ei=HN5BUe3YLMWXO8vkgNgN&usq=AFQjCNHwTAn\\_VjRByL74GQSAq-mmLD4XYQ&sig2=Dgizs6-smdvyJnCuAnGtZw](http://www.google.dk/url?sa=t&rct=j&q=&esrc=s&frm=1&source=web&cd=1&cad=rja&ved=0CC0QFjAA&url=http%3A%2F%2Fwww.sst.dk%2F~%2Fmedia%2FPlanlaegning%2520og%2520kvalitet%2FSpecialeplanlaegning%2FSpecialevejledninger_2010%2FSpecialevejledning_%2520gynaekologi_obstetrik.ashx&ei=HN5BUe3YLMWXO8vkgNgN&usq=AFQjCNHwTAn_VjRByL74GQSAq-mmLD4XYQ&sig2=Dgizs6-smdvyJnCuAnGtZw). Danish.
3. Tal og analyse: Fødselsstatistikken 2011 [Numbers and analysis: Birthstatistics 2011]. Copenhagen. Danish Health and Medicines Authority; 2012. Available from: <http://www.sst.dk/publ/Publ2012/03mar/Foedselsstatistik2011.pdf>. Danish.
4. Fødsler 1973- [Births 1973-] [database on the Internet]. Danish Health and Medicines Authority. Available from: <http://www.ssi.dk/Sundhedsdataogit/Dataformidling/Sundhedsdata/Fodsler/Fodsler%201973.aspx>. Danish.
5. Cohen A. Seasonal daily effect on the number of births in Israel. *J R Stat Soc Ser C Appl Stat.* 1983;32(3):228-35.
6. Curtin SC, Park MM. Trends in the attendant, place, and timing of births, and in the use of obstetric interventions: United States, 1989-97. *Natl Vital Stat Rep.* 1999;47(27):1-12.
7. MacFarlane A. Variations in number of births and perinatal mortality by day of week in England and Wales. *Br Med J.* 1978;2(6153):1670-3.
8. Martins JM. Never on Sundays. *Med J Aust.* 1972;1(10):487-8.
9. Menaker W, Menaker A. Lunar periodicity in human reproduction: a likely unit of biological time. *Am J Obstet Gynecol.* 1959;77(4):905-14.
10. Odegard O. Season of birth in the population of Norway, with particular reference to the September birth maximum. *Br J Psychiatry.* 1977;131:339-44.
11. Borst LB, Osley M. Letter: Holiday effects upon natality. *Am J Obstet Gynecol.* 1975;122(7):902-3.
12. Rindfuss RR, Ladinsky JL, Coppock E, Marshall VW, Macpherson AS. Convenience and the occurrence of births: induction of labor in the United States and Canada. *Int J Health Serv.* 1979;9(3):439-60.
13. Hawe E, MacFarlane A. Daily and seasonal variation in live births, stillbirths and infant mortality in England and Wales, 1979-96. *Health Statistics Quarterly.* 2001;(9):5-15.
14. Osley M, Summerville D, Borst LB. Natality and the moon. *Am J Obstet Gynecol.* 1973;117(3):413-5.
15. Huang XM. A planning model for requirement of emergency beds. *IMA J Math Appl Med Biol.* 1995;12(3-4):345-53.
16. Kao EP, Tung GG. Bed allocation in a public health care delivery system. *Management Science.* 1981;27(5):507-20.
17. Pike MC, Proctor DM, Wyllie JM. Analysis of Admissions to a Casualty Ward. *Br J Prev Soc Med.* 1963;17:172-6.
18. Kirkwood BR. The Poisson Distribution. *Essentials of Medical Statistics*: Blackwell Science; 1988. p. 125-7.
19. Fallenstein F, Haener W, Huch A, Huch R. The influence of the moon on deliveries. *Am J Obstet Gynecol.* 1984;148(1):119-20.



**Table 1** Type of births in each department in the capital region of Denmark during 2000-2009, with number and percentages of spontaneous births, acute caesarean after spontaneous onset of labour, births after induction of labour and elective caesarean sections.

| Obstetric clinic  | Births per clinic | Non-elective births (81 %) |    |                 |    | Elective births (19 %) |    |                    |    |
|-------------------|-------------------|----------------------------|----|-----------------|----|------------------------|----|--------------------|----|
|                   |                   | Spontaneous birth          | %  | Acute caesarean | %  | Induced birth          | %  | Elective caesarean | %  |
| Rigshospitalet    | 35.657            | 19.144                     | 54 | 5.740           | 16 | 6.345                  | 18 | 4.428              | 12 |
| Hvidovre          | 53.300            | 39.335                     | 74 | 7.264           | 14 | 2.375                  | 4  | 4.326              | 8  |
| Frederiksberg     | 17.751            | 13.784                     | 78 | 1.794           | 10 | 1.266                  | 7  | 907                | 5  |
| Gentofte          | 21.988            | 14.216                     | 65 | 2.863           | 13 | 3.349                  | 15 | 1.560              | 7  |
| Glostrup          | 22.737            | 15.972                     | 70 | 2.883           | 13 | 2.808                  | 12 | 1.074              | 5  |
| Herlev            | 23.967            | 17.352                     | 72 | 2.800           | 12 | 2.680                  | 11 | 1.135              | 5  |
| Hillerød          | 35.890            | 23.209                     | 65 | 4.653           | 13 | 5.133                  | 14 | 2.895              | 8  |
| All seven clinics | 211.290           | 143.012                    | 68 | 27.997          | 13 | 23.956                 | 11 | 16.325             | 8  |

Figure I Residual variance almost identical to the mean number of births per day, in accordance with the Poisson distribution.

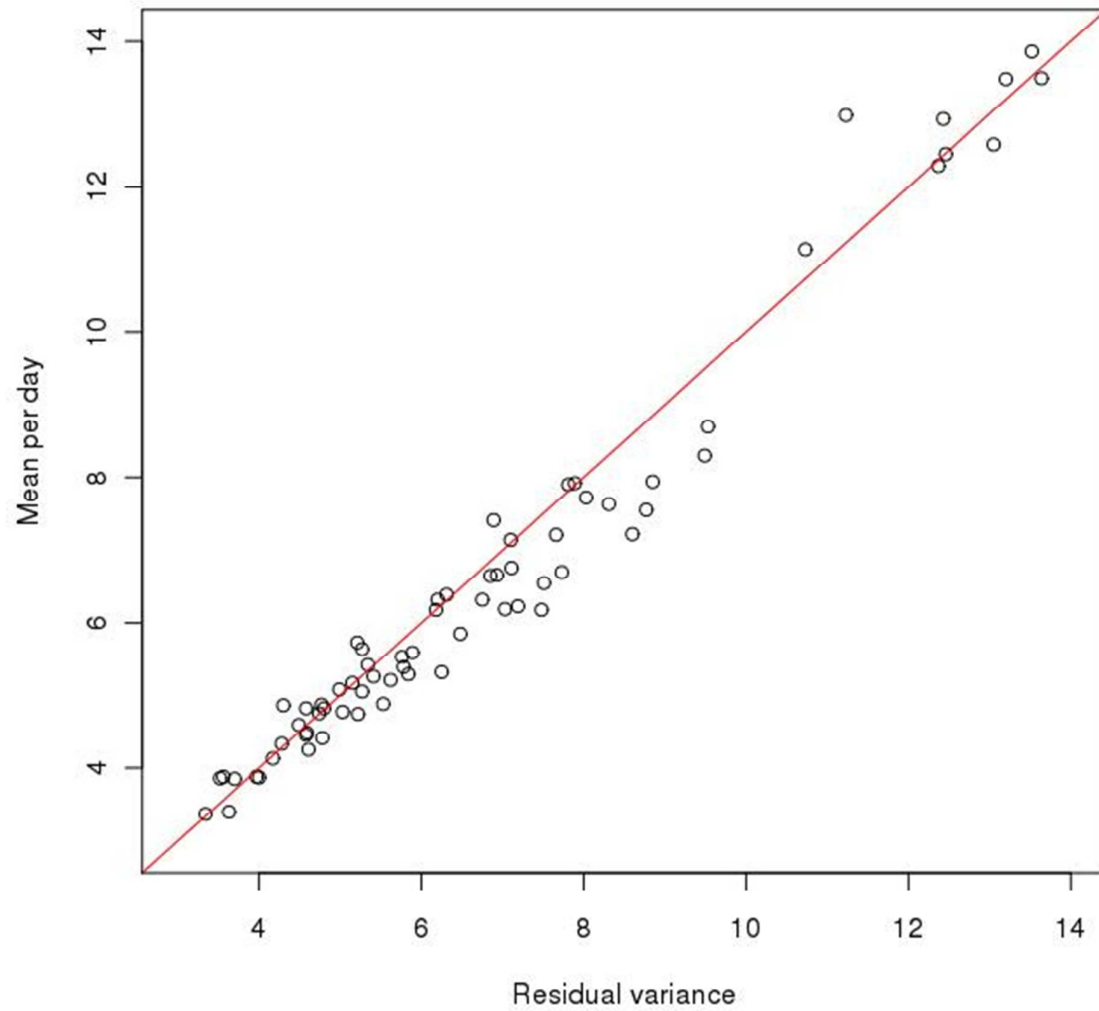

**Figure II** Examples of a small (Gentofte), medium (Herlev) and large (Hvidovre Hospital(HH)) birthplace with number of births at the x axis and density at the y axis with curves indicating the Poisson distribution (Red) and the normal distribution (Green).

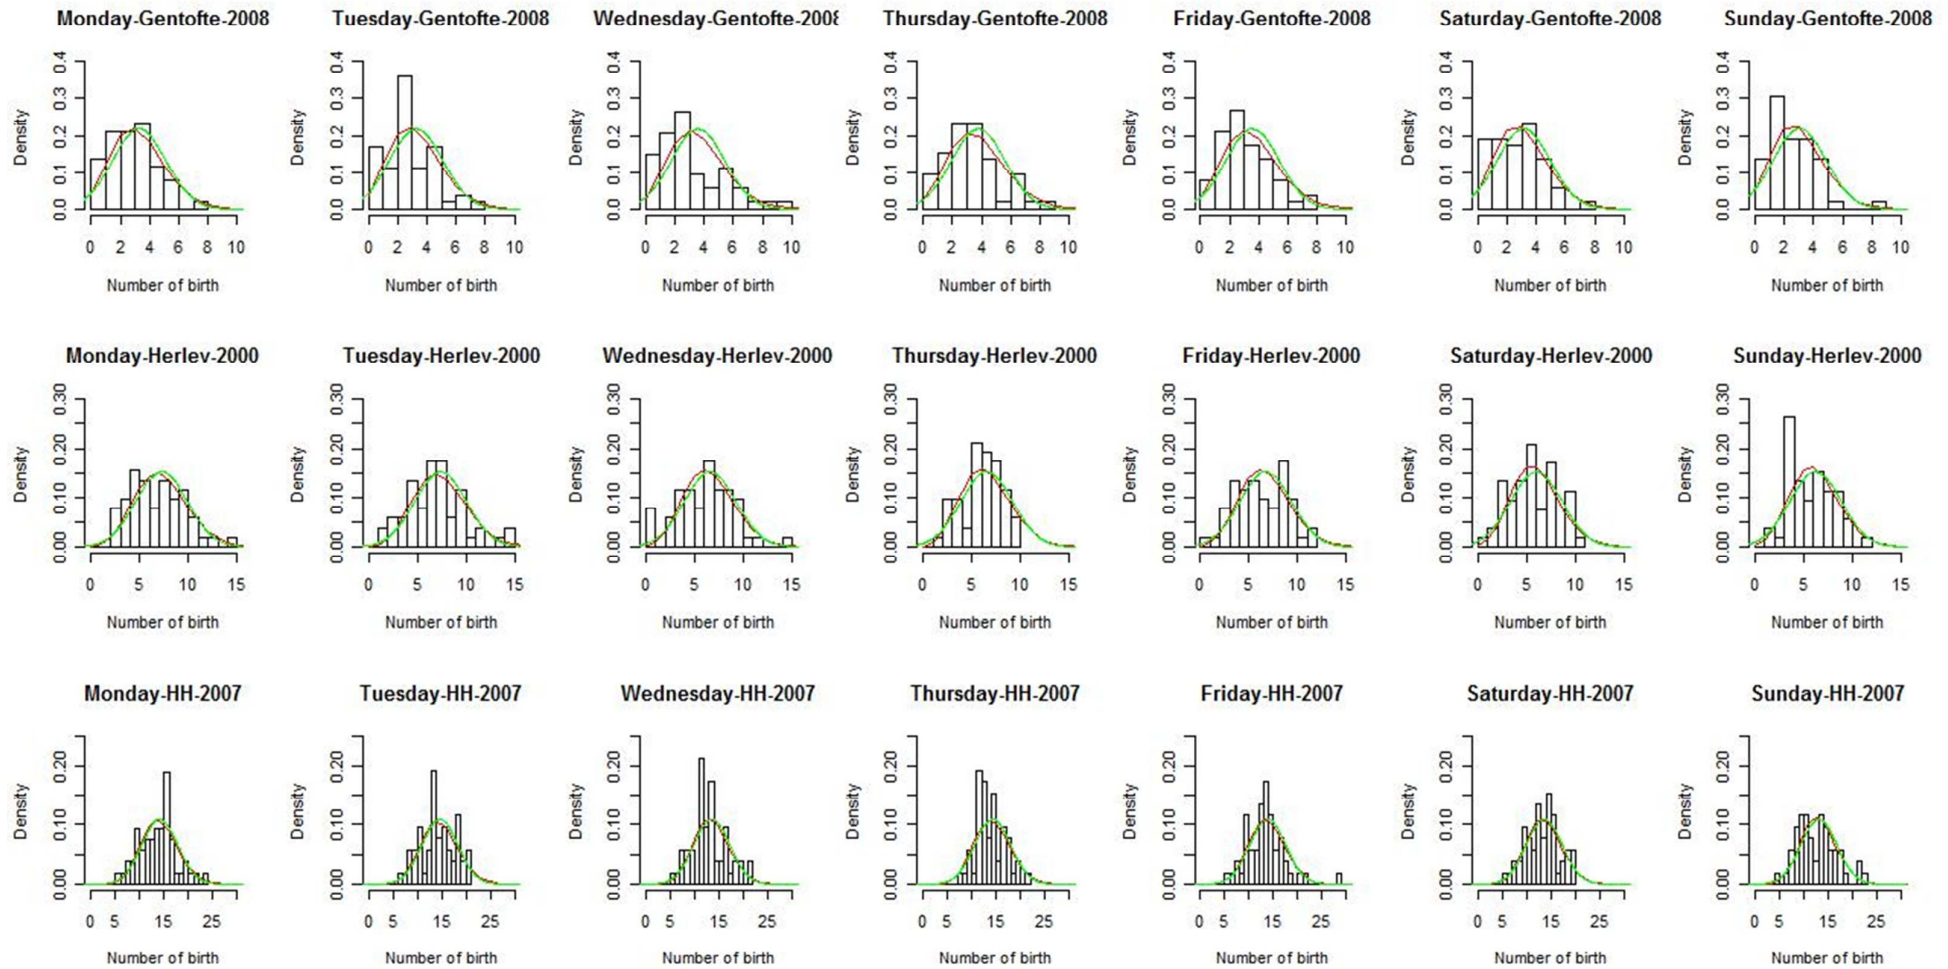

## Licence to BMJ Publishing Group Limited (“BMJ Group”) for Publication

To be agreed to by the corresponding author or guarantor on behalf of all authors, (“Corresponding Author”); all authors collectively are referred to as the “Contributors”.

In consideration of the BMJ Group, (“the Publisher”) considering to publish the article contained within the original manuscript which includes without limitation any diagrams, photographs, other illustrative material, video, film or any other material howsoever submitted by the Contributor(s) at any time and related to the Contribution, (“the Contribution”), certain rights are required to be granted by each different category of author(s), which are as follows:

1. For employees of the **UK Crown acting in the course of their employment**, a non exclusive Licence, as set out below. All provisions of this document apply. The non exclusivity relates to the original submitted manuscript video, films, images, photographs, diagrams and/or illustrative material only).
2. For employees of the **US Federal Government acting in the course of their employment**, no copyright exists and the Contribution is in the public domain so no licence is required to be granted. The Author Warranties below apply (excluding 1.iii).
3. For all other authors, an exclusive Licence, as set out below. All provisions of this document apply.

**NB** where a Contribution is a multi authored work, each author’s element of the Contribution will be dealt with in accordance with 1, 2 or 3 above, as applicable.

### The licence

The Licence granted in accordance with 1 or 3 above is:

A worldwide licence to the Publisher and its licensees in perpetuity (subject to the Reversion of Rights set out below), in all forms, formats and media (whether known now or created in the future), to i) publish, reproduce, distribute, display and store the Contribution, ii) translate the Contribution into other languages, create

adaptations, reprints, include within collections and create summaries, extracts and/or, abstracts of the Contribution and convert or allow conversion into any format including without limitation audio, iii) create any other derivative work(s) based in whole or part on the Contribution, iv) to exploit all subsidiary rights that currently exist or as may exist in the future in the Contribution, v) the inclusion of electronic links from the Contribution to third party material where-ever it may be located; and, vi) licence any third party to do any or all of the above.

If you and/or any co-author’s employer own the copyright to the Contribution, you must obtain in writing, the relevant employers’ consent to grant the licence and agree to all obligations herein. The author(s) hereby agree that, in the event that the BMJ Group sell the whole or part of its journal business to any third party, the benefit and the burden of the Licence contained herein shall be assigned to that third party.

### Additional rights and obligations

The author(s) (and their employers as applicable), hereby authorise the Publisher to take such steps as they consider necessary at their own expense in the copyright owner’s name and on their behalf, if they believe that a third party is infringing or is likely to infringe copyright or the rights granted to the Publisher herein in the Contribution without further recourse to the copyright owner(s).

For **Unlocked** articles (as defined below), the Publisher expressly agree to place the published Contribution for display on PubMed Central (including their international mirror sites) promptly after allocation of an issue number and thereafter publication, without extra charge for this deposit to the authors or their employers (provided PubMed Central does not charge the Publisher), which will include any Publisher supplied amendments or retractions.

“**Unlocked**” means where the author or their employer or other institution has agreed with the Publisher that this Contribution should be considered an Open Access contribution and has paid the Publisher the standard rate in force.

1  
2  
3  
4  
5  
6  
7  
8  
9  
10  
11  
12  
13  
14  
15  
16  
17  
18  
19  
20  
21  
22  
23  
24  
25  
26  
27  
28  
29  
30  
31  
32  
33  
34  
35  
36  
37  
38  
39  
40  
41  
42  
43  
44  
45  
46  
47  
48  
49  
50  
51  
52  
53  
54  
55  
56  
57  
58  
59  
60

“Locked” articles are all other articles including Research Funded articles.

“Research Funded” articles are Locked Articles but which have been funded wholly or substantially by a funding organisation listed on our manuscript submission website under “Recognised Funders.”

The author(s) acknowledge and accept that BMJ Group may make additional changes to the Contribution as considered necessary in accordance with standard editorial processes whether before or after publication. The Corresponding Author will usually see proofs for their Contribution and every effort will be made to consult with the Corresponding Author if substantial alterations are made. The BMJ Group may also retract or publish a correction or other notice when it considers this appropriate for legal or editorial reasons and this shall be at its absolute discretion which shall be exercised reasonably.

### Reversion of rights

If the Contribution is not published in the print or electronic versions of the Journal or any other Publisher’s products within 12 months of final acceptance by the BMJ Group, (or as otherwise agreed in writing), any Licence granted herein shall automatically terminate and all rights shall revert to the copyright owner. The Publisher may keep a copy of the Contribution as a record (including via any contractor).

### Rights granted to owners of the contribution

Ownership of copyright remains with the author(s) or their employers if they are acting in the course of their employment. All rights not expressly granted are, subject to the Licence terms, reserved by the Publisher. In return for the grant of the Licence herein, the copyright owner(s) shall have the following rights for **non-Commercial Use (unless otherwise stated)** of the Contribution:

1. The right to reproduce a reasonable number (no more than 100) print copies of the final Contribution, by copying or downloading from the BMJ Group website, for personal use and to send copies to colleagues in print or electronic form

provided no fee is charged and this is not done on a systematic basis (which includes via mass e-mailings).

2. The right to include the Contribution in a compilation for classroom use (course packs) to be distributed free of charge (other than for direct photocopying cost) to students at the Contributor(s)’s institution or to be stored in digital format in data rooms for access by students as part of their course work and for in house training programmes of the Contributor(s)’s employer or at seminars or conferences subject to a limit of 100 copies per conference or seminar.
3. The right to i) to post the accepted manuscript (but not the final published version of the Contribution), and the abstract of the final published Contribution on the Contributor(s)’s own and/or his/her institution’s website, 6 months after the print publication date or if not published in print, from being published online, ii) where the article is “Unlocked” for copyright owners to publish the final published Contribution and abstract, as published by the Publisher, in any media from the date of publication for non Commercial Use; and iii) for Research Funded Articles only, the right for the Contributor (s)’s to place the accepted manuscript on PubMed Central (including their international mirror sites) after an embargo period of 12 months from the date of Publication unless otherwise stated on our manuscript submission website under “Recognised Funders”.

The following statements must accompany the articles posted on the Contributor(s)’s and/or his/her institution’s website:

#### Locked and research funded articles acknowledgement

This article has been accepted for publication in [*Contributor, please insert journal name*]. The definitive copyedited, typeset version [*Contributor please insert complete citation information when*

*available*] is available online at: [www. \[Contributor please insert as applicable\] .com](http://www.[Contributor please insert as applicable].com)

#### Unlocked article acknowledgement

This article has been accepted for publication in [*Contributor please insert full citation*] following peer review and can also be viewed on the journal's website at [www. \[Contributor please insert as applicable\] .com](http://www.[Contributor please insert as applicable].com)

In addition, for Unlocked articles copyright owners (and the Publisher) may allow third parties to use the Contribution in accordance with the Creative Commons Attribution Non Commercial 2.0 licence – see

<http://creativecommons.org/licenses/by-nc/2.0/> and <http://creativecommons.org/licenses/by-nc/2.0/legalcode>

subject to ensuring that the Publisher and Journal are referenced (including a full citation), all third party rights within all images, diagrams, photographs, other illustrative material or films not owned by the authors or BMJ Group are cleared independently and appropriately and all Publisher's trademarks are removed from any derivative works and ensuring any translations, for which a prior translation agreement with BMJ Group has not been established, must prominently display the statement:

"This is an unofficial translation of an article that appeared in a BMJ Group publication. BMJ Group has not endorsed this translation."

4. The right to publish with the necessary acknowledgement of the Publisher and the Journal, all or part of the material from the published Contribution in a book essay, position paper, or other non peer reviewed publication authored or edited by the Contributor(s)'s (which may be a Commercial Use). This does not apply to multiple Contributions in the same journal, for which permission from the Publisher must be sought.
5. The right to use selected figures and tables (of which the author or his employer owns or has licensed) and selected text (up to 300 words) from the Contribution for incorporation within another work published in print or digital format by a third party, so long as full credit is given to the Publisher and use of the parts of the

Contribution is non Commercial Use.

6. The right to receive a royalty for up to 5 years from publication of 10% of any net receipts less sales commission on single orders in excess of £2000 received by the Publisher for any single Contribution reprint or translation sales to a single third party, subject however to any fee being determined (if charged) at the absolute discretion of the Publisher as may be altered from time to time. If the Publisher receives such an order for reprint sales of the Contribution, they will contact the Corresponding Author at the address given on the published Contribution to find out to whom payment should be made. Corresponding Authors have the responsibility to ensure that all authors have agreed what should be done with any such royalty payment.

For permission to use materials that are beyond uses permitted here, visit

<http://group.bmj.com/group/rights-licensing/permissions>.

"Commercial Use" includes:

- copying or downloading of documents, or linking to such postings, for further redistribution, sale or licensing, for a fee;
- copying, downloading or posting by a site or service that incorporates advertising with such content;
- the inclusion or incorporation of document content in other works or services (other than for legally permitted quotations with an appropriate citation) that is then available for sale or licensing, for a fee.
- use of documents or document content (other than for legally permitted quotations with appropriate citation) by organisations for any promotional or advertising purposes whether direct or indirect, whether for a fee or otherwise. Distribution by or on behalf of pharmaceutical organisations is considered in all cases as Commercial Use;
- use for the purposes of monetary reward by means of sale, resale, license, loan, hire transfer or other form of commercial exploitation.

### Author warranties

The author(s) warrant that: i) they are the sole author(s) of the Contribution which is an original work; ii) the whole or a substantial part of the Contribution has not previously been published; iii) they or their employers are the copyright owners of the Contribution; iv) to the best of their knowledge that the Contribution does not contain anything which is libellous, illegal or infringes any third party's copyright or other rights; v) that they have obtained all necessary written consents for any patient information which is supplied with the Contribution; and vi) that they have declared or will accurately declare all competing interests to the Publisher.

### Law and jurisdiction

This Agreement shall be governed by and construed in accordance with the laws of England without regard to the principles of conflicts of law. The parties hereto submit to the exclusive jurisdiction of the English courts.

### The following statement must be included in your manuscript (other than for US Federal Government Employees acting in the course of their employment):

"I [*insert full name*] The Corresponding Author of this article contained within the original manuscript which includes any diagrams & photographs and any related or stand alone film submitted (the Contribution") has the right to grant on behalf of all authors and does grant on behalf of all authors, a licence to the BMJ Publishing Group Ltd and its licensees, to permit this Contribution (if accepted) to be published in any BMJ Group products and to exploit all subsidiary rights, as set out in our licence set out at:

[http://group.bmj.com/products/journals/instructions-for-authors/wholly\\_owned\\_licence.pdf](http://group.bmj.com/products/journals/instructions-for-authors/wholly_owned_licence.pdf)

### IF YOU ARE A NATIONAL INSTITUTE OF HEALTH ("NIH") EMPLOYEE, CONTRACTOR OR TRAINEE

**ADD:** I am a National Institute of Health ("NIH") employee, contractor or trainee, and the following cover sheet will be accepted by the BMJ Group and NIH and incorporated into the above Licence

<http://group.bmj.com/products/journals/instructions-for-authors/nihcoversheet.pdf> .

### The following statement must be included in your manuscript for US Federal Government employees acting in the course of their employment:

"I [*insert full name*] The Corresponding Author has the right on behalf of all Contributors to seek publication by the BMJ Group of all content within the submitted Contribution or as later submitted (which includes without limitation any diagrams, photographs, other illustrative material, video, film or any other material howsoever submitted by any of the Contributors at any time and related to this article) and to grant the warranties all as fully set out here:

[http://group.bmj.com/products/journals/instructions-for-authors/wholly\\_owned\\_licence.pdf](http://group.bmj.com/products/journals/instructions-for-authors/wholly_owned_licence.pdf)

Please tick **one or more** boxes as appropriate:

- I am the sole author of the Contribution.
- I am one author signing on behalf of all co-authors of the Contribution.
- The Contribution has been made in the course of my employment and I am signing as authorised by my employer.
- I am a US Federal Government employee acting in the course of my employment.
- I am not a US Federal Government employee, but some or all of my co-authors are.
- I am an employee of the UK Crown acting in the course of my employment.\*
- I am not an employee of the UK Crown acting in the course of my employment but some/all of my co-authors are.\*

\*Such authors should consult the attached guidance and if necessary return any completed form; see

<http://www.nationalarchives.gov.uk/documents/information-management/articles-ministers-civil-servants-annexa.pdf>

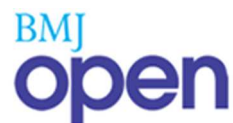

**A MODEL FOR THE DISTRIBUTION OF DAILY NUMBER OF BIRTHS IN OBSTETRIC CLINICS BASED ON A DESCRIPTIVE RETROSPECTIVE STUDY**

|                                 |                                                                                                                                                                                                                                                                                                                                                                                 |
|---------------------------------|---------------------------------------------------------------------------------------------------------------------------------------------------------------------------------------------------------------------------------------------------------------------------------------------------------------------------------------------------------------------------------|
| Journal:                        | <i>BMJ Open</i>                                                                                                                                                                                                                                                                                                                                                                 |
| Manuscript ID:                  | bmjopen-2013-002920.R1                                                                                                                                                                                                                                                                                                                                                          |
| Article Type:                   | Research                                                                                                                                                                                                                                                                                                                                                                        |
| Date Submitted by the Author:   | 25-May-2013                                                                                                                                                                                                                                                                                                                                                                     |
| Complete List of Authors:       | Gam, Christiane; Hillerød Hospital, Copenhagen University Hospital, Department of Gynecology and Obstetrics<br>Tanniou, Julien; University of Copenhagen, Department of Biostatistics<br>Keiding, Niels; University of Copenhagen, Department of Biostatistics<br>Løkkegaard, Ellen; Hillerød Hospital, Copenhagen University Hospital, Department of Gynecology and Obstetrics |
| <b>Primary Subject Heading</b>: | Medical management                                                                                                                                                                                                                                                                                                                                                              |
| Secondary Subject Heading:      | Evidence based practice, Obstetrics and gynaecology                                                                                                                                                                                                                                                                                                                             |
| Keywords:                       | Human resource management < HEALTH SERVICES ADMINISTRATION & MANAGEMENT, Organisation of health services < HEALTH SERVICES ADMINISTRATION & MANAGEMENT, OBSTETRICS                                                                                                                                                                                                              |
|                                 |                                                                                                                                                                                                                                                                                                                                                                                 |

SCHOLARONE™  
Manuscripts

only



1  
2  
3 **A MODEL FOR THE DISTRIBUTION OF DAILY NUMBER OF BIRTHS IN OBSTETRIC CLINICS BASED ON A DESCRIPTIVE**  
4 **RETROSPECTIVE STUDY**  
5

6 Christiane M. B. Gam<sup>1</sup>, Julien Tanniou<sup>2</sup>, Niels Keiding<sup>2</sup> and Ellen L. Løkkegaard<sup>1</sup>  
7  
8  
9  
10  
11  
12  
13  
14  
15  
16  
17  
18  
19  
20  
21  
22  
23

24 **Contact information**

25 Christiane Marie Bourgin Gam, MD, Ph.D. fellow

26 Ellen Leth Løkkegaard, MD, Ph.D.

27 Department of Gynaecology and Obstetrics, Hillerød Hospital<sup>1</sup>

28 Dyrehavevej 29

29 DK-3400 Hillerød

30 (+45) 40 74 13 39

31 [christiane.gam@sund.ku.dk](mailto:christiane.gam@sund.ku.dk)  
32  
33  
34  
35  
36  
37  
38

39 Niels Keiding, professor in biostatistics

40 Julien Tanniou, statistician, Ph.D. fellow

41 Department of Biostatistics, University of Copenhagen<sup>2</sup>

42 Øster Farimagsgade 5,

43 P.O.B. 2099

44 DK-1014 Copenhagen K  
45  
46  
47  
48  
49

50 **Keywords:** distribution, births, model, Poisson, manpower, obstetric clinic

51 **Word count:** 2375  
52  
53  
54  
55  
56  
57  
58  
59  
60

**ABSTRACT**

**Objective:** To test whether the relatively unpredictable nature of labour onset can be described by the Poisson distribution.

**Design:** A descriptive retrospective study.

**Setting:** From the Danish Birth Registry we identified births from all seven obstetric clinics in the Capital region of Denmark (n=211,290) between 2000 and the end of 2009. On each date the number of births at each department was registered. Births are categorised in whether an elective Caesarean section or induction of labour has been performed and among the remaining 'non-elective births' acute Caesareans were registered.

**Methods:** After exclusion of elective Caesarean sections and births after induction of labour only 'non-elective' births (n=171,009) were included for the main statistical analysis. Simple descriptive plots and one-way analysis of variance were used to analyse the distribution of 'non-elective' births for each day of the week.

**Main outcome measures:** The daily number of 'non-elective' births.

**Results:** The number of 'non-elective' births varies considerably over the days of the week and over the year for each obstetric clinic regardless of clinic size. However, for each fixed day of the week the variation over the year is well described by a Poisson distribution, allowing simple prediction of the variability. For births at each fixed day of the week, the Poisson distribution is indistinguishable from a normal distribution.

**Conclusion:** The number of 'non-elective' births for each day of the week is well-described by a Poisson distribution. Consequently the Poisson model is suitable for estimating the variation in the daily number of 'non-elective' births and could be used for planning of manpower in obstetric clinics. The model can be used in smaller as well as larger clinics.

**ARTICLE SUMMARY**

**Article focus:** Does the Poisson distribution correspond precisely to actual random variation in the number of 'non-elective' births for each fixed day of the week?

**Key Message box:**

- For each day of the week, the variation of 'non-elective' births over the year is well described by a Poisson distribution.
- The Poisson distribution makes it easy to estimate the variation in the daily number of births and can be used for planning of manpower in obstetric clinics. Standard tables of the normal distribution may be used as exemplified.
- The model is adequate for use in smaller as well as larger clinics and can be used in management of manpower in obstetric clinics.

**Strengths and limitations of this study:** The main strength is the large dataset of non-selected births. The main limitation is that births are registered only by date, not by time of birth.

## INTRODUCTION

There is a structural reorganization of hospitals going on in Denmark implying larger but fewer hospitals. This applies also for the departments of Gynaecology and Obstetrics as smaller departments are being merged resulting in fewer larger departments (1-3). The main motivation for these changes has been that larger departments would **enhance the capacity and quality of patient treatment and additionally reduce the costs for staff at shifts. In Denmark the overall year to year variation in number of births at each department is centrally determined as each department of obstetrics on an administrative level is intended to have a given number of births from a specified geographical region. The manpower required in each obstetric clinic is therefore determined from this figure. The largest part of manpower consists of a daily number of midwives working eight hours shift during day, evening and night, as well as a varying number of midwives on 24 hour duty on call from home. Their actual working hours vary considerably. The number of doctors on shift is fixed for each obstetric clinic and depends on the size of the obstetric clinic, as does the number of doctors on call from home.**

**An interesting organizational feature in obstetrics is the inherent random variation in onset of spontaneous labour** which makes it difficult to precisely plan the necessary number of staff at the obstetric clinics. The planning of manpower in the departments is to our knowledge not based on published methods. Statistics on the number of births on each day for each department every year is available online from Statistics Denmark (4). These numbers indicate considerable day to day variation and week to week variation. The observation of a weekly cycle is in accordance with reports from other countries such as England, Wales, Australia, the United States, Israel and Norway (5-13) and interestingly it has also been shown that the variation depends on whether the Sabbath occurs on a Friday (14), a Saturday (5) or Sunday (6-13). However these former studies included all births regardless of whether or not there had been an elective obstetric intervention, which raises the question whether the variation between the days of the week disappears, when births resulting from an elective obstetric intervention as elective Caesarean or induction of labour are excluded from the data set. There is a long tradition of describing the variation in the daily demand for hospital beds by the Poisson distribution (15-17) sometimes based on queuing theory and with varying efforts at empirical verification. In her well-known textbook Kirkwood (18) used an apparently hypothetical example of manpower planning under uncertainty in the face of merging two obstetrical departments to illustrate the Poisson distribution.

In this study we examine from a broad Danish experience how well the Poisson distribution corresponds to actual random variation in the number of 'non-elective' births for each fixed day of the week. Since the variation in the 'non-elective' births is most obviously random, we exclude in the main analysis 'elective' births (resulting from induction of labour and elective Caesarean sections). However, as a sensitivity analysis we report results on the variation of all births and of acute Caesarean sections.

## MATERIAL AND METHODS

### *Data*

The number of births for each date in the period from the 1<sup>st</sup> of January 2000 until the 31<sup>st</sup> of December 2009 at all seven obstetric clinics in the capital region of Denmark were extracted from the Danish Birth registry. The obstetric clinics were Rigshospitalet, Frederiksberg, Glostrup, Gentofte, Herlev, Hvidovre and Hillerød, which cover over 99% of all births in the region, as a dwindling number of births takes place at home in Denmark. The data included information on the type of birth: elective Caesarean sections, births after elective induction of labour, acute Caesarean sections and births after spontaneous onset of labour. The labelling of the type of birth has been done by using information from the National Birth registry on operation codes for elective Caesarean sections (KMCA10B and D) and obstetric codes for induction of labour (KMAC00 Amniotomy prior to birth, KMAC96A Mechanical catheter induction, BKHD2 Unspecific medical induction, BKHD20 Induction with prostaglandin, BKHD21 Induction with oxytocin) . The coding of birth information is based on information from midwives and is generally considered very valid.

### *Statistical methods*

The main concept of these analyses builds on the empirical fact that even for 'non-elective' births there is a non-ignorable variation across the seven days of the week, however for each fixed day of the week the variation across the 52 (53) weeks in a given year may be interpreted as random. We exploit the well-known fact that Poisson distributions are well approximated by normal distributions with the same mean and variance, clearly distinguishable by the Poisson distribution property that the mean equals the variance. In this way the key issue – whether the Poisson distribution is an adequate description – is captured by a one-way analysis of variance comparing the seven days of the week for each of the ten years and each of the seven clinics. The results are illustrated by descriptive graphs and worked examples of possible use in manpower planning. Additional sensitivity analyses are performed including all births and acute Caesareans.

### *Details of ethics approval*

An ethical approval for this study was not required. The data used are available online in an anonymous form.

## RESULTS

There were 211,290 births distributed on seven departments in the capital region of Denmark from the 1<sup>st</sup> of January 2000 until the 31<sup>st</sup> of December 2009. In order to exclude potential **elective** births, births were subdivided into induced or spontaneous labour and elective and acute Caesareans (Table I). Births where the mode of delivery was an elective Caesarean (n=16,325 (7.73 %)) and births initiated by induction of

1  
2  
3 labour (n=23,956 (11.34%)) were excluded from the data set for main analyses, thus leaving a total of  
4 171,009 (80.94%) spontaneous births and acute Caesareans, to be denoted 'non-elective' below.

5  
6 As mentioned in the introduction a main problem in obstetrics management is the variation over days of  
7 the week. This variation is to a large degree a result of decisions by the obstetricians on how to distribute  
8 elective Caesareans and electively induced labour over the days of the week (6, 12). Preliminary descriptive  
9 analyses of the data clearly indicated that such policies varied considerably over the ten years for each  
10 department and that the patterns were rather different between departments, however overall a mid-  
11 weekly peak in births remained even when 'elective' births were excluded (please see the supplementary  
12 file, Figure III-IX). The manpower required for these 'elective' births is a consequence of management  
13 decisions, and our focus is here on how to capture the primarily random variation in the 'non-elective'  
14 births. Because of the strong heterogeneity in the day-to-day pattern for several of the involved  
15 departments over the ten years under study, we performed a set of 70 one-way analyses of variance  
16 comparing the number of 'non-elective' births at each day of the week for each fixed combination of  
17 department (n=7) and year (n=10). The residual variances from these 70 analyses were compared to the  
18 annual mean number of births for each department. Additional sensitivity analyses were performed  
19 including all births and acute Caesareans. As seen in Figure I, the residual variances are very close to the  
20 means, indicating a Poisson distribution of the variation in number of 'non-elective' births for each day of  
21 the week around the yearly average for that day. We also see that the closeness of residual variance to the  
22 mean improves when we only look at the 'non-elective' births while for the acute Caesareans only there is  
23 a clear trend that the variance is larger than the mean, so-called overdispersion which violates the  
24 assumption of Poisson distribution. In view of these findings we focus on the non-elective births in the  
25 following.

26  
27 To illustrate our findings three selected combinations of department and year, a small, medium and large  
28 clinic, were chosen. For each day of the week a histogram shows the observed distribution of the 52 (53)  
29 numbers of births per day for that year with fitted normal distribution (red) and fitted Poisson distribution  
30 was produced (green) (Figure II). It is seen that there is a nice fit throughout of the Poisson distributions,  
31 and also that they are very close to the normal distributions with the same variance. This means that  
32 calculations of the likely variation in number of 'non-elective' births can be based on the normal  
33 distribution with variance given by the average number of 'non-elective' births per day over the year.

34  
35 For example, if at a particular department in a particular year the mean number of 'non-elective' births is 9,  
36 the residual variance is estimated to be 9 and the standard deviation as the square root of 9, that is, 3.  
37 Assume that the mean number of 'non-elective' births on Tuesdays for that department for that year is  
38 10.5. In 95% of Tuesdays the actual number of 'non-elective births' at that department will be in the  
39 interval between  $10.5 - 3 \times 1.96 = 4.6$  and  $10.5 + 3 \times 1.96 = 17.4$ , while in 80% of Tuesdays there will be  
40  
41  
42  
43  
44  
45  
46  
47  
48  
49  
50  
51  
52  
53  
54  
55  
56  
57  
58  
59  
60

1  
2  
3 between  $10.5 - 3 \times 1.28 = 6.7$  and  $10.5 + 3 \times 1.28 = 14.3$  non-elective births. This model is suitable for  
4 estimating daily number of births and planning of manpower in obstetric clinics and the model is adequate  
5 to be used in smaller as well as larger clinics.  
6  
7

## 8 9 **DISCUSSION**

10 Management of manpower in obstetric clinics is a difficult task, due to the relatively unpredictable nature  
11 of labour onset. Nowadays many births are 'elective' births in the sense that elective Caesarean sections or  
12 medically induced labour more or less governs the time of the week where the birth happens. It has been  
13 assumed that the day to day variation on numbers of births fits a Poisson distribution (13, 18), but suitable  
14 data on live births, including mode of delivery, from a larger population has not previously been studied,  
15 thus limiting the means of studying day to day variation (7, 13). Furthermore the impact of elective  
16 obstetric intervention on the distribution has not been considered in any of the previous studies addressing  
17 birth variation (5-14, 19).  
18

19 Interestingly we find that even with the exclusion of births resulting from an obstetric intervention as  
20 elective caesarean or induction of labour, the remaining data still show significant weekly variation with a  
21 mid-weekly peak. As such this variation might not only be ascribed to measurable obstetric interventions,  
22 but also less tangible practices, for instance the time of admittance of a woman in early stages of labour  
23 might depend on staff numbers which vary during the week. Also traditional non-medical methods of  
24 starting labour (hot baths, sexual intercourse, etc.) might be less likely to be tried by mothers in the  
25 weekends (7).  
26

27 However regardless of any obstetric practices or mothers practice, we found that the distribution of the  
28 remaining 'non-elective' births for each day of the week, each year, and each department is still well  
29 approximated by a Poisson distribution, where the mean equals the variance. For the relevant parameter  
30 values, this Poisson distribution is indistinguishable from a normal distribution, where we then may  
31 estimate the variance from the mean. This means that calculations of the likely variation in number of non-  
32 elective births can be based on the normal distribution with variance given by the average number of non-  
33 elective births per day over the year.  
34

35 This provides us with a useful tool for planning of the manpower necessary to handle all births on a given  
36 weekday in an obstetric clinic. Elective Caesarean sections are usually planned to be performed on specific  
37 weekdays with staff dedicated to this task. Births after induction of labour will also in most regards be  
38 planned. Combining the known number of elective births with the calculation of a 95% or 80% confidence  
39 interval of 'non-elective' births on a given week day gives a good possibility to avoid over- or understaffing  
40 and utilize the available human resources to their best. For larger clinics where the mean number of non-  
41 elective births for a given weekday may vary by more than 1-2 births, the relocation of manpower to 'peak'  
42  
43  
44  
45  
46  
47  
48  
49  
50  
51  
52  
53  
54  
55  
56  
57  
58  
59  
60

1  
2  
3 weekdays has the most to offer, but even smaller clinics can benefit from more concrete calculation, for  
4 example on how weekend manpower should be.

5  
6 The fact that the distribution of 'non-elective' births is indistinguishable from normal distribution provides a  
7 simple, but elegant, tool for planning of manpower in obstetric clinics and used wisely may prove a positive  
8 adjustment for work efficiency, cost and environment.  
9  
10

### 11 12 13 **CONCLUSIONS**

14 We may estimate the variance from the mean, as the Poisson distribution for these parameters is  
15 indistinguishable from a normal distribution. This model is suitable for estimating the variation in the daily  
16 number of 'non-elective' births and could be used for planning of manpower in obstetric clinics.  
17  
18

### 19 20 21 **COMPETING INTEREST**

22 All authors have completed the Unified Competing Interest form at  
23 [http://www.icmje.org/coi\\_disclosure.pdf](http://www.icmje.org/coi_disclosure.pdf) (available on request from the corresponding author) and  
24 declare: no support from any organization for the submitted work, no financial relationships with any  
25 organization that might have an interest in the submitted work in the previous three, no other relationships  
26 or activities that could appear to have influenced the submitted work.  
27  
28  
29

### 30 31 32 **FUNDING**

33 This research received no specific grant from any funding agency in the public, commercial or not-for-profit  
34 sectors.  
35  
36  
37

### 38 39 40 **CONTRIBUTION TO AUTHORSHIP**

41 CMG, NK, JT and EL have all been involved in the conception of this study. The statistical analysis has been  
42 carried out mainly by JT under the guidance of NK, EL and CMG. The writing of this article has been done by  
43 CMG, NK, JT and EL. Coordination of the correspondence between authors has been taken care of by CMG.  
44  
45  
46  
47  
48  
49  
50  
51  
52  
53

### 54 55 **REFERENCES**

- 56 1. Sygehusfødsler og fødeafdelingernes størrelse 1982-2005. Nye tal fra Sundhedsstyrelsen  
57 [Hospital births and size at birth departments 1982-2005. New figures from the Danish Health and  
58  
59  
60



- 1  
2  
3 Medicines Auhtority]. Copenhagen. Danish Health and Medicines Authority; 2007. Available from:  
4 [http://www.sst.dk/publ/tidsskrifter/nyetal/pdf/2007/03\\_07.pdf](http://www.sst.dk/publ/tidsskrifter/nyetal/pdf/2007/03_07.pdf). Danish.
- 5 2. Sygehusbehandling og Beredskab. Specialevejledning for gynækologi og obstetrik [Hospital  
6 and Emergency Management. Guidelines for the speciality of gynecology and obstetrics] [database on the  
7 Internet]. Danish Health and Medicines Authority. 2011. Available from:  
8 [http://www.google.dk/url?sa=t&rct=j&q=&esrc=s&frm=1&source=web&cd=1&cad=rja&ved=OCC0QFjAA&url=http%3A%2F%2Fwww.sst.dk%2F~%2Fmedia%2FPlanlaegning%2520og%2520kvalitet%2FSpecialeplanlaegning%2FSpecialevejledninger\\_2010%2FSpecialevejledning\\_%2520gynaekologi\\_obstetrik.ashx&ei=HN5BUe3YLMWxO8vkgNgN&usg=AFQjCNHwTAn\\_VjRByL74GQSAq-mmLD4XYQ&sig2=Dgizs6-smdvyJnCuAnGtZw](http://www.google.dk/url?sa=t&rct=j&q=&esrc=s&frm=1&source=web&cd=1&cad=rja&ved=OCC0QFjAA&url=http%3A%2F%2Fwww.sst.dk%2F~%2Fmedia%2FPlanlaegning%2520og%2520kvalitet%2FSpecialeplanlaegning%2FSpecialevejledninger_2010%2FSpecialevejledning_%2520gynaekologi_obstetrik.ashx&ei=HN5BUe3YLMWxO8vkgNgN&usg=AFQjCNHwTAn_VjRByL74GQSAq-mmLD4XYQ&sig2=Dgizs6-smdvyJnCuAnGtZw).  
9 Danish.
- 10  
11 3. Tal og analyse: Fødselsstatistikken 2011 [Numbers and analysis: Birthstatistics 2011].  
12 Copenhagen. Danish Health and Medicines Authority; 2012. Available from:  
13 <http://www.sst.dk/publ/2012/03mar/Foedselsstatistik2011.pdf>. Danish.
- 14 4. Fødsler 1973- [Births 1973-] [database on the Internet]. Danish Health and Medicines  
15 Authority. Available from:  
16 <http://www.ssi.dk/Sundhedsdataogit/Dataformidling/Sundhedsdata/Fodsler/Fodsler%201973.aspx>.  
17 Danish.
- 18 5. Cohen A. Seasonal daily effect on the number of births in Israel. *J R Stat Soc Ser C Appl Stat.*  
19 1983;32(3):228-35.
- 20 6. Curtin SC, Park MM. Trends in the attendant, place, and timing of births, and in the use of  
21 obstetric interventions: United States, 1989-97. *Natl Vital Stat Rep.* 1999;47(27):1-12.
- 22 7. MacFarlane A. Variations in number of births and perinatal mortality by day of week in  
23 England and Wales. *Br Med J.* 1978;2(6153):1670-3.
- 24 8. Martins JM. Never on Sundays. *Med J Aust.* 1972;1(10):487-8.
- 25 9. Menaker W, Menaker A. Lunar periodicity in human reproduction: a likely unit of biological  
26 time. *Am J Obstet Gynecol.* 1959;77(4):905-14.
- 27 10. Odegard O. Season of birth in the population of Norway, with particular reference to the  
28 September birth maximum. *Br J Psychiatry.* 1977;131:339-44.
- 29 11. Borst LB, Osley M. Letter: Holiday effects upon natality. *Am J Obstet Gynecol.*  
30 1975;122(7):902-3.
- 31 12. Rindfuss RR, Ladinsky JL, Coppock E, Marshall VW, Macpherson AS. Convenience and the  
32 occurrence of births: induction of labor in the United States and Canada. *Int J Health Serv.* 1979;9(3):439-  
33 60.
- 34 13. Hawe E, MacFarlane A. Daily and seasonal variation in live births, stillbirths and infant  
35 mortality in England and Wales, 1979-96. *Health Statistics Quarterly.* 2001;(9):5-15.
- 36 14. Osley M, Summerville D, Borst LB. Natality and the moon. *Am J Obstet Gynecol.*  
37 1973;117(3):413-5.
- 38 15. Huang XM. A planning model for requirement of emergency beds. *IMA J Math Appl Med Biol.*  
39 1995;12(3-4):345-53.
- 40 16. Kao EP, Tung GG. Bed allocation in a public health care delivery system. *Management*  
41 *Science.* 1981;27(5):507-20.
- 42 17. Pike MC, Proctor DM, Wyllie JM. Analysis of Admissions to a Casualty Ward. *Br J Prev Soc*  
43 *Med.* 1963;17:172-6.
- 44 18. Kirkwood BR. The Poisson Distribution. *Essentials of Medical Statistics: Blackwell Science;*  
45 1988. p. 125-7.
- 46 19. Fallenstein F, Haener W, Huch A, Huch R. The influence of the moon on deliveries. *Am J*  
47 *Obstet Gynecol.* 1984;148(1):119-20.
- 48  
49  
50  
51  
52  
53  
54  
55  
56  
57  
58  
59  
60

1  
2  
3 **A MODEL FOR THE DISTRIBUTION OF DAILY NUMBER OF BIRTHS IN OBSTETRIC CLINICS BASED ON A DESCRIPTIVE**  
4 **RETROSPECTIVE STUDY**  
5

6 Christiane M. B. Gam<sup>1</sup>, Julien Tanniou<sup>2</sup>, Niels Keiding<sup>2</sup> and Ellen L. Løkkegaard<sup>1</sup>  
7  
8  
9  
10  
11  
12  
13  
14  
15  
16  
17  
18  
19  
20  
21  
22  
23

24 **Contact information**

25 Christiane Marie Bourgin Gam, MD, Ph.D. fellow

26 Ellen Leth Løkkegaard, MD, Ph.D.

27 Department of Gynaecology and Obstetrics, Hillerød Hospital<sup>1</sup>

28 Dyrehavevej 29

29 DK-3400 Hillerød

30 (+45) 40 74 13 39

31 [christiane.gam@sund.ku.dk](mailto:christiane.gam@sund.ku.dk)  
32  
33  
34  
35  
36  
37  
38

39 Niels Keiding, professor in biostatistics

40 Julien Tanniou, statistician, Ph.D. fellow

41 Department of Biostatistics, University of Copenhagen<sup>2</sup>

42 Øster Farimagsgade 5,

43 P.O.B. 2099

44 DK-1014 Copenhagen K  
45  
46  
47  
48  
49

50 **Keywords:** distribution, births, model, Poisson, manpower, obstetric clinic

51 **Word count:** 2375  
52  
53  
54  
55  
56  
57  
58  
59  
60

1  
2  
3 ABSTRACT

4 **Objective:** To test whether the relatively unpredictable nature of labour onset can be described by the  
5 **Poisson distribution.**

6  
7 **Design:** A descriptive retrospective study.

8  
9 **Setting:** From the Danish Birth Registry we identified births from all seven obstetric clinics in the Capital  
10 region of Denmark (n=211,290) between 2000 and the end of 2009. On each date the number of births at  
11 each department was registered. Births are categorised in whether an elective Caesarean section or  
12 induction of labour has been performed and among the remaining 'non-elective births' acute Caesareans  
13 were registered.

14  
15 **Methods:** After exclusion of elective Caesarean sections and births after induction of labour only 'non-  
16 elective' births (n=171,009) were included for the main statistical analysis. Simple descriptive plots and  
17 one-way analysis of variance were used to analyse the distribution of 'non-elective' births for each day of  
18 the week.

19  
20 **Main outcome measures:** The daily number of 'non-elective' births.

21  
22 **Results:** The number of 'non-elective' births varies considerably over the days of the week and over the  
23 year for each obstetric clinic regardless of clinic size. However, for each fixed day of the week the variation  
24 over the year is well described by a Poisson distribution, allowing simple prediction of the variability. For  
25 births at each fixed day of the week, the Poisson distribution is indistinguishable from a normal distribution.

26  
27 **Conclusion:** The number of 'non-elective' births for each day of the week is well-described by a Poisson  
28 distribution. Consequently the Poisson model is suitable for estimating the variation in the daily number  
29 of 'non-elective' births and could be used for planning of manpower in obstetric clinics. The model can be  
30 used in smaller as well as larger clinics.

**ARTICLE SUMMARY**

**Article focus:** Does the Poisson distribution correspond precisely to actual random variation in the number of 'non-elective' births for each fixed day of the week?

**Key Message box:**

- For each day of the week, the variation of 'non-elective' births over the year is well described by a Poisson distribution.
- The Poisson distribution makes it easy to estimate the variation in the daily number of births and can be used for planning of manpower in obstetric clinics. Standard tables of the normal distribution may be used as exemplified.
- The model is adequate for use in smaller as well as larger clinics and can be used in management of manpower in obstetric clinics.

**Strengths and limitations of this study:** The main strength is the large dataset of non-selected births. The main limitation is that births are registered only by date, not by time of birth.

## INTRODUCTION

There is a structural reorganization of hospitals going on in Denmark implying larger but fewer hospitals. This applies also for the departments of Gynaecology and Obstetrics as smaller departments are being merged resulting in fewer larger departments (1-3). The main motivation for these changes has been that larger departments would enhance the capacity and quality of patient treatment and additionally reduce the costs for staff at shifts. **In Denmark the overall year to year variation in number of births at each department is centrally determined as each department of obstetrics on an administrative level is intended to have a given number of births from a specified geographical region. The manpower required in each obstetric clinic is therefore determined from this figure. The largest part of manpower consists of a daily number of midwives working eight hours shift during day, evening and night, as well as a varying number of midwives on 24 hour duty on call from home. Their actual working hours vary considerably. The number of doctors on shift is fixed for each obstetric clinic and depends on the size of the obstetric clinic, as does the number of doctors on call from home.**

An interesting organizational feature in obstetrics is the inherent random variation in onset of spontaneous labour which makes it difficult to precisely plan the necessary number of staff at the obstetric clinics. The planning of manpower in the departments is to our knowledge not based on published methods. Statistics on the number of births on each day for each department every year is available online from Statistics Denmark (4). These numbers indicate considerable day to day variation and week to week variation. The observation of a weekly cycle is in accordance with reports from other countries such as England, Wales, Australia, the United States, Israel and Norway (5-13) and interestingly it has also been shown that the variation depends on whether the Sabbath occurs on a Friday (14), a Saturday (5) or Sunday (6-13). However these former studies included all births regardless of whether or not there had been an elective obstetric intervention, **which raises the question whether the variation between the days of the week disappears**, when births resulting from an elective obstetric intervention as elective Caesarean or induction of labour are excluded from the data set. There is a long tradition of describing the variation in the daily demand for hospital beds by the Poisson distribution (15-17) sometimes based on queuing theory and with varying efforts at empirical verification. In her well-known textbook Kirkwood (18) used an apparently hypothetical example of manpower planning under uncertainty in the face of merging two obstetrical departments to illustrate the Poisson distribution.

**In this study we examine from a broad Danish experience how well the Poisson distribution corresponds to actual random variation in the number of 'non-elective' births for each fixed day of the week. Since the variation in the 'non-elective' births is most obviously random, we exclude in the main analysis 'elective' births (resulting from induction of labour and elective Caesarean sections). However, as a sensitivity analysis we report results on the variation of all births and of acute Caesarean sections.**

## MATERIAL AND METHODS

### *Data*

The number of births for each date in the period from the 1<sup>st</sup> of January 2000 until the 31<sup>st</sup> of December 2009 at all seven obstetric clinics in the capital region of Denmark were extracted from the Danish Birth registry. The obstetric clinics were Rigshospitalet, Frederiksberg, Glostrup, Gentofte, Herlev, Hvidovre and Hillerød, which cover over 99% of all births in the region, as a dwindling number of births takes place at home in Denmark. The data included information on the type of birth: elective Caesarean sections, births after elective induction of labour, acute Caesarean sections and births after spontaneous onset of labour. The labelling of the type of birth has been done by using information from the National Birth registry on operation codes for elective Caesarean sections (KMCA10B and D) and obstetric codes for induction of labour (KMAC00 Amniotomy prior to birth, KMAC96A Mechanical catheter induction, BKHD2 Unspecific medical induction, BKHD20 Induction with prostaglandin, BKHD21 Induction with oxytocin). The coding of birth information is based on information from midwives and is generally considered very valid.

### *Statistical methods*

The main concept of these analyses builds on the empirical fact that even for 'non-elective' births there is a non-ignorable variation across the seven days of the week, however for each fixed day of the week the variation across the 52 (53) weeks in a given year may be interpreted as random. We exploit the well-known fact that Poisson distributions are well approximated by normal distributions with the same mean and variance, clearly distinguishable by the Poisson distribution property that the mean equals the variance. In this way the key issue – whether the Poisson distribution is an adequate description – is captured by a one-way analysis of variance comparing the seven days of the week for each of the ten years and each of the seven clinics. The results are illustrated by descriptive graphs and worked examples of possible use in manpower planning. Additional sensitivity analyses are performed including all births and acute Caesareans.

### *Details of ethics approval*

An ethical approval for this study was not required. The data used are available online in an anonymous form.

## RESULTS

There were 211,290 births distributed on seven departments in the capital region of Denmark from the 1<sup>st</sup> of January 2000 until the 31<sup>st</sup> of December 2009. In order to exclude potential elective births, births were subdivided into induced or spontaneous labour and elective and acute Caesareans (Table I). Births where

1  
2  
3 the mode of delivery was an elective Caesarean (n=16,325 (7.73 %)) and births initiated by induction of  
4 labour (n=23,956 (11.34%)) were excluded from the data set for main analyses, thus leaving a total of  
5 171,009 (80.94%) spontaneous births and acute Caesareans, to be denoted 'non-elective' below.

6  
7 As mentioned in the introduction a main problem in obstetrics management is the variation over days of  
8 the week. This variation is to a large degree a result of decisions by the obstetricians on how to distribute  
9 elective Caesareans and electively induced labour over the days of the week (6, 12). **Preliminary**  
10 **descriptive analyses** of the data clearly indicated that such policies varied considerably over the ten years  
11 for each department and that the patterns were rather different between departments, **however overall a**  
12 **mid-weekly peak in births remained even when 'elective' births were excluded (please see the**  
13 **supplementary file, Figure III-IX). The manpower** required for these 'elective' births is a consequence of  
14 management decisions, **and our focus is here on how to capture the primarily random variation in the**  
15 **'non-elective' births.** Because of the strong heterogeneity in the day-to-day pattern for several of the  
16 involved departments over the ten years under study, we performed a set of 70 one-way analyses of  
17 variance comparing the number of 'non-elective' births at each day of the week for each fixed combination  
18 of department (n=7) and year (n=10). The residual variances from these 70 analyses were compared to the  
19 annual mean number of births for each department. **Additional sensitivity analyses were performed**  
20 **including all births and acute Caesareans.** As seen in Figure I, the residual variances are very close to the  
21 means, indicating a Poisson distribution of the variation in number of 'non-elective' births for each day of  
22 the week around the yearly average for that day. **We also see that the closeness of residual variance to**  
23 **the mean improves when we only look at the 'non-elective' births while for the acute Caesareans only**  
24 **there is a clear trend that the variance is larger than the mean, so-called overdispersion which violates**  
25 **the assumption of Poisson distribution. In view of these findings we focus on the non-elective births in**  
26 **the following.**

27  
28 To illustrate our findings three selected combinations of department and year, a small, medium and large  
29 clinic, were chosen. **For each day of the week a histogram shows the observed distribution of the 52 (53)**  
30 **numbers of births per day for that year with fitted normal distribution (red) and fitted Poisson**  
31 **distribution was produced (green) (Figure II).** It is seen that there is a nice fit throughout of the Poisson  
32 distributions, and also that they are very close to the normal distributions with the same variance. This  
33 means that calculations of the likely variation in number of 'non-elective' births can be based on the  
34 normal distribution with variance given by the average number of 'non-elective' births per day over the  
35 year.

36  
37 For example, if at a particular department in a particular year the mean number of 'non-elective' births is 9,  
38 the residual variance is estimated to be 9 and the standard deviation as the square root of 9, that is, 3.  
39 Assume that the mean number of 'non-elective' births on Tuesdays for that department for that year is  
40  
41  
42  
43  
44  
45  
46  
47  
48  
49  
50  
51  
52  
53  
54  
55  
56  
57  
58  
59  
60

1  
2  
3 10.5. In 95% of Tuesdays the actual number of 'non-elective births' at that department will be in the  
4 interval **between**  $10.5 - 3 \times 1.96 = 4.6$  and  $10.5 + 3 \times 1.96 = 17.4$ , while in 80% of Tuesdays there will be  
5 between  $10.5 - 3 \times 1.28 = 6.7$  and  $10.5 + 3 \times 1.28 = 14.3$  non-elective births. This model is suitable for  
6 **estimating daily number of births and planning of manpower in obstetric clinics and the model is**  
7 **adequate to be used in smaller as well as larger clinics.**  
8  
9  
10

## 11 12 13 DISCUSSION

14 Management of manpower in obstetric clinics is a difficult task, due to the relatively unpredictable nature  
15 of labour onset. Nowadays many births are 'elective' births in the sense that elective Caesarean sections or  
16 medically induced labour **more or less** governs the time of the week where the birth happens. It has been  
17 assumed that the day to day variation on numbers of births fits a Poisson distribution (13, 18), but suitable  
18 data on live births, including mode of delivery, from a larger population has not previously been studied,  
19 thus limiting the means of studying day to day variation (7, 13). Furthermore the impact of elective  
20 obstetric intervention on the distribution has not been considered in any of the previous studies addressing  
21 birth variation (5-14, 19).  
22  
23  
24  
25  
26

27 Interestingly we find that even with the exclusion of births **resulting from an obstetric intervention as**  
28 **elective caesarean or induction of labour**, the remaining data still show significant weekly variation with a  
29 mid-weekly peak. As such this variation might not only be ascribed to measurable obstetric interventions,  
30 but also less tangible practices, for instance the time of admittance of a woman in early stages of labour  
31 might depend on staff numbers which vary during the week. Also traditional non-medical methods of  
32 starting labour (hot baths, sexual intercourse, etc.) might be less likely to be tried by mothers in the  
33 weekends (7).  
34  
35  
36  
37

38 However regardless of any obstetric practices or mothers practice, we found that the distribution of the  
39 remaining 'non-elective' births for each day of the week, each year, and each department is still well  
40 approximated by a Poisson distribution, where the mean equals the variance. For the relevant parameter  
41 values, this Poisson distribution is indistinguishable from a normal distribution, where we then may  
42 estimate the variance from the mean. **This means that calculations of the likely variation in number of**  
43 **non-elective births can be based on the normal distribution with variance given by the average number**  
44 **of non-elective births per day over the year.**  
45  
46  
47  
48  
49

50 **This provides us with a useful tool for planning of the manpower necessary to handle all births on a given**  
51 **weekday in an obstetric clinic. Elective Caesarean sections are usually planned to be performed on**  
52 **specific weekdays with staff dedicated to this task. Births after induction of labour will also in most**  
53 **regards be planned. Combining the known number of elective births with the calculation of a 95% or 80%**  
54 **confidence interval of 'non-elective' births on a given week day gives a good possibility to avoid over- or**  
55  
56  
57  
58  
59  
60



1  
2  
3 **understaffing and utilize the available human resources to their best. For larger clinics where the mean**  
4 **number of non-elective births for a given weekday may vary by more than 1-2 births, the relocation of**  
5 **manpower to 'peak' weekdays has the most to offer, but even smaller clinics can benefit from more**  
6 **concrete calculation, for example on how weekend manpower should be.**

7  
8  
9 **The fact that the distribution of 'non-elective' births is indistinguishable from normal distribution**  
10 **provides a simple, but elegant, tool for planning of manpower in obstetric clinics and used wisely may**  
11 **prove a positive adjustment for work efficiency, cost and environment.**

#### 12 13 14 15 16 **CONCLUSIONS**

17 We may estimate the variance from the mean, as the Poisson distribution for these parameters is  
18 indistinguishable from a normal distribution. This model is suitable **for estimating the variation in the daily**  
19 **number of 'non-elective' births and could be used for planning of manpower in obstetric clinics.**

#### 20 21 22 23 24 **COMPETING INTEREST**

25 All authors have completed the Unified Competing Interest form at  
26 [http://www.icmje.org/coi\\_disclosure.pdf](http://www.icmje.org/coi_disclosure.pdf) (available on request from the corresponding author) and  
27 declare: no support from any organization for the submitted work, no financial relationships with any  
28 organization that might have an interest in the submitted work in the previous three, no other relationships  
29 or activities that could appear to have influenced the submitted work.

#### 30 31 32 33 34 35 **FUNDING**

36 This research received no specific grant from any funding agency in the public, commercial or not-for-profit  
37 sectors.

#### 38 39 40 41 42 **CONTRIBUTION TO AUTHORSHIP**

43 CMG, NK, JT and EL have all been involved in the conception of this study. The statistical analysis has been  
44 carried out mainly by JT under the guidance of NK, EL and CMG. The writing of this article has been done by  
45 CMG, NK, JT and EL. Coordination of the correspondence between authors has been taken care of by CMG.

## REFERENCES

1. Sygehusfødsler og fødeafdelingernes størrelse 1982-2005. Nye tal fra Sundhedsstyrelsen [Hospital births and size at birth departments 1982-2005. New figures from the Danish Health and Medicines Authority]. Copenhagen. Danish Health and Medicines Authority; 2007. Available from: [http://www.sst.dk/publ/tidsskrifter/nyetal/pdf/2007/03\\_07.pdf](http://www.sst.dk/publ/tidsskrifter/nyetal/pdf/2007/03_07.pdf). Danish.
2. Sygehusbehandling og Beredskab. Specialevejledning for gynækologi og obstetrik [Hospital and Emergency Management. Guidelines for the speciality of gynecology and obstetrics] [database on the Internet]. Danish Health and Medicines Authority. 2011. Available from: [http://www.google.dk/url?sa=t&rct=j&q=&esrc=s&frm=1&source=web&cd=1&cad=rja&ved=0CC0QFjAA&url=http%3A%2F%2Fwww.sst.dk%2F~%2Fmedia%2FPlanlaegning%2520og%2520kvalitet%2FSpecialeplanlaegning%2FSpecialevejledninger\\_2010%2FSpecialevejledning\\_%2520gynaekologi\\_obstetrik.ashx&ei=HN5BUe3YLMWXO8vkgNgN&usg=AFQjCNHwTAn\\_VjRByL74GQSAq-mmLD4XYQ&sig2=Dgizs6-smdvyJnCuAnGtZw](http://www.google.dk/url?sa=t&rct=j&q=&esrc=s&frm=1&source=web&cd=1&cad=rja&ved=0CC0QFjAA&url=http%3A%2F%2Fwww.sst.dk%2F~%2Fmedia%2FPlanlaegning%2520og%2520kvalitet%2FSpecialeplanlaegning%2FSpecialevejledninger_2010%2FSpecialevejledning_%2520gynaekologi_obstetrik.ashx&ei=HN5BUe3YLMWXO8vkgNgN&usg=AFQjCNHwTAn_VjRByL74GQSAq-mmLD4XYQ&sig2=Dgizs6-smdvyJnCuAnGtZw). Danish.
3. Tal og analyse: Fødselsstatistikken 2011 [Numbers and analysis: Birthstatistics 2011]. Copenhagen. Danish Health and Medicines Authority; 2012. Available from: <http://www.sst.dk/publ/Publ2012/03mar/Foedselsstatistik2011.pdf>. Danish.
4. Fødsler 1973- [Births 1973-] [database on the Internet]. Danish Health and Medicines Authority. Available from: <http://www.ssi.dk/Sundhedsdataogit/Dataformidling/Sundhedsdata/Fodsler/Fodsler%201973.aspx>. Danish.
5. Cohen A. Seasonal daily effect on the number of births in Israel. *J R Stat Soc Ser C Appl Stat.* 1983;32(3):228-35.
6. Curtin SC, Park MM. Trends in the attendant, place, and timing of births, and in the use of obstetric interventions: United States, 1989-97. *Natl Vital Stat Rep.* 1999;47(27):1-12.
7. MacFarlane A. Variations in number of births and perinatal mortality by day of week in England and Wales. *Br Med J.* 1978;2(6153):1670-3.
8. Martins JM. Never on Sundays. *Med J Aust.* 1972;1(10):487-8.
9. Menaker W, Menaker A. Lunar periodicity in human reproduction: a likely unit of biological time. *Am J Obstet Gynecol.* 1959;77(4):905-14.
10. Odegard O. Season of birth in the population of Norway, with particular reference to the September birth maximum. *Br J Psychiatry.* 1977;131:339-44.
11. Borst LB, Osley M. Letter: Holiday effects upon natality. *Am J Obstet Gynecol.* 1975;122(7):902-3.
12. Rindfuss RR, Ladinsky JL, Coppock E, Marshall VW, Macpherson AS. Convenience and the occurrence of births: induction of labor in the United States and Canada. *Int J Health Serv.* 1979;9(3):439-60.
13. Hawe E, MacFarlane A. Daily and seasonal variation in live births, stillbirths and infant mortality in England and Wales, 1979-96. *Health Statistics Quarterly.* 2001;(9):5-15.
14. Osley M, Summerville D, Borst LB. Natality and the moon. *Am J Obstet Gynecol.* 1973;117(3):413-5.
15. Huang XM. A planning model for requirement of emergency beds. *IMA J Math Appl Med Biol.* 1995;12(3-4):345-53.
16. Kao EP, Tung GG. Bed allocation in a public health care delivery system. *Management Science.* 1981;27(5):507-20.
17. Pike MC, Proctor DM, Wyllie JM. Analysis of Admissions to a Casualty Ward. *Br J Prev Soc Med.* 1963;17:172-6.
18. Kirkwood BR. The Poisson Distribution. *Essentials of Medical Statistics*: Blackwell Science; 1988. p. 125-7.
19. Fallenstein F, Haener W, Huch A, Huch R. The influence of the moon on deliveries. *Am J Obstet Gynecol.* 1984;148(1):119-20.

1  
2  
3  
4  
5  
6  
7  
8  
9  
10  
11  
12  
13  
14  
15  
16  
17  
18  
19  
20  
21  
22  
23  
24  
25  
26  
27  
28  
29  
30  
31  
32  
33  
34  
35  
36  
37  
38  
39  
40  
41  
42  
43  
44  
45  
46  
47  
48  
49  
50  
51  
52  
53  
54  
55  
56  
57  
58  
59  
60

**Figure I** Residual variance compared to the mean number of births per day for a) 'non-elective' births, b) all births and c) acute Caesarean sections.

a)

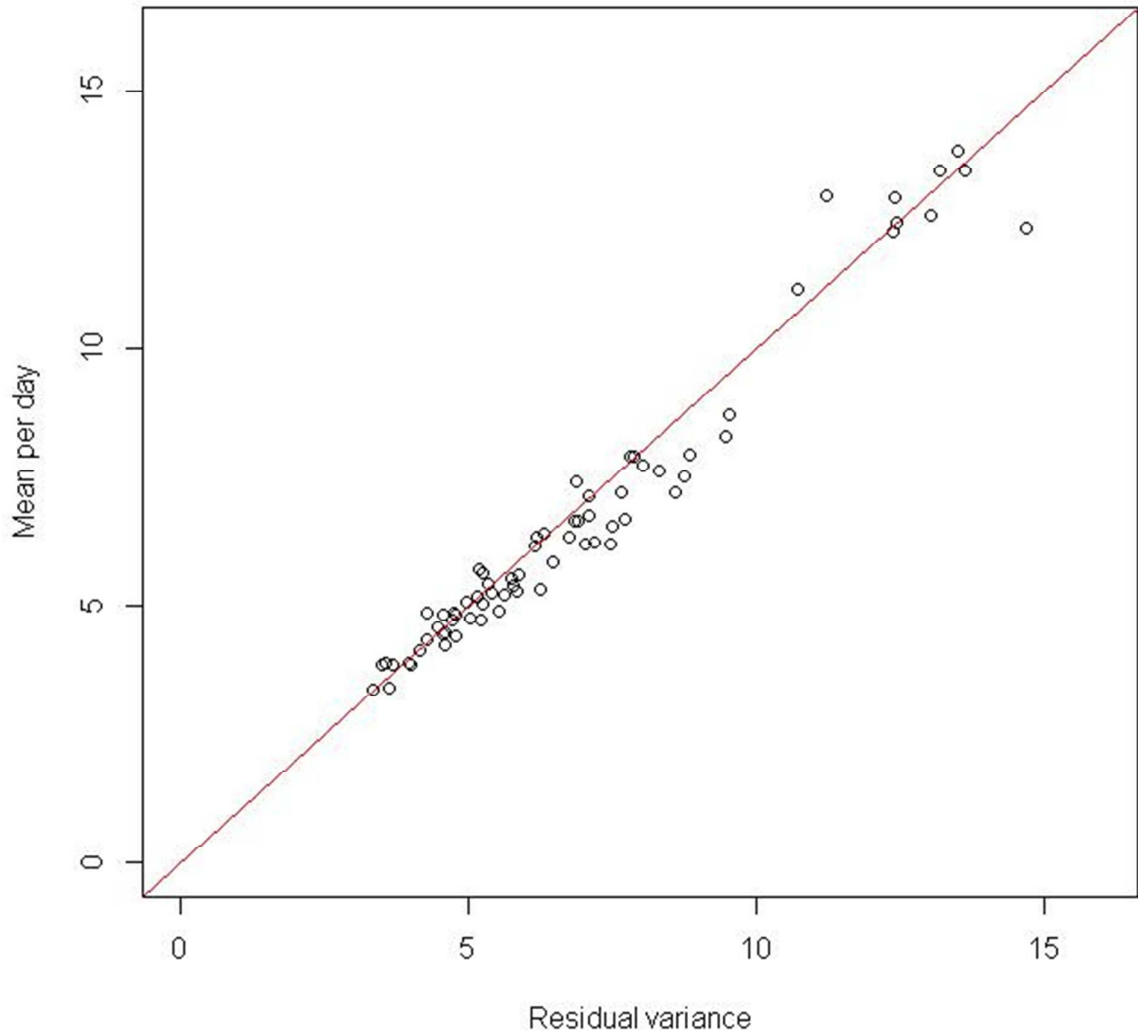

b)

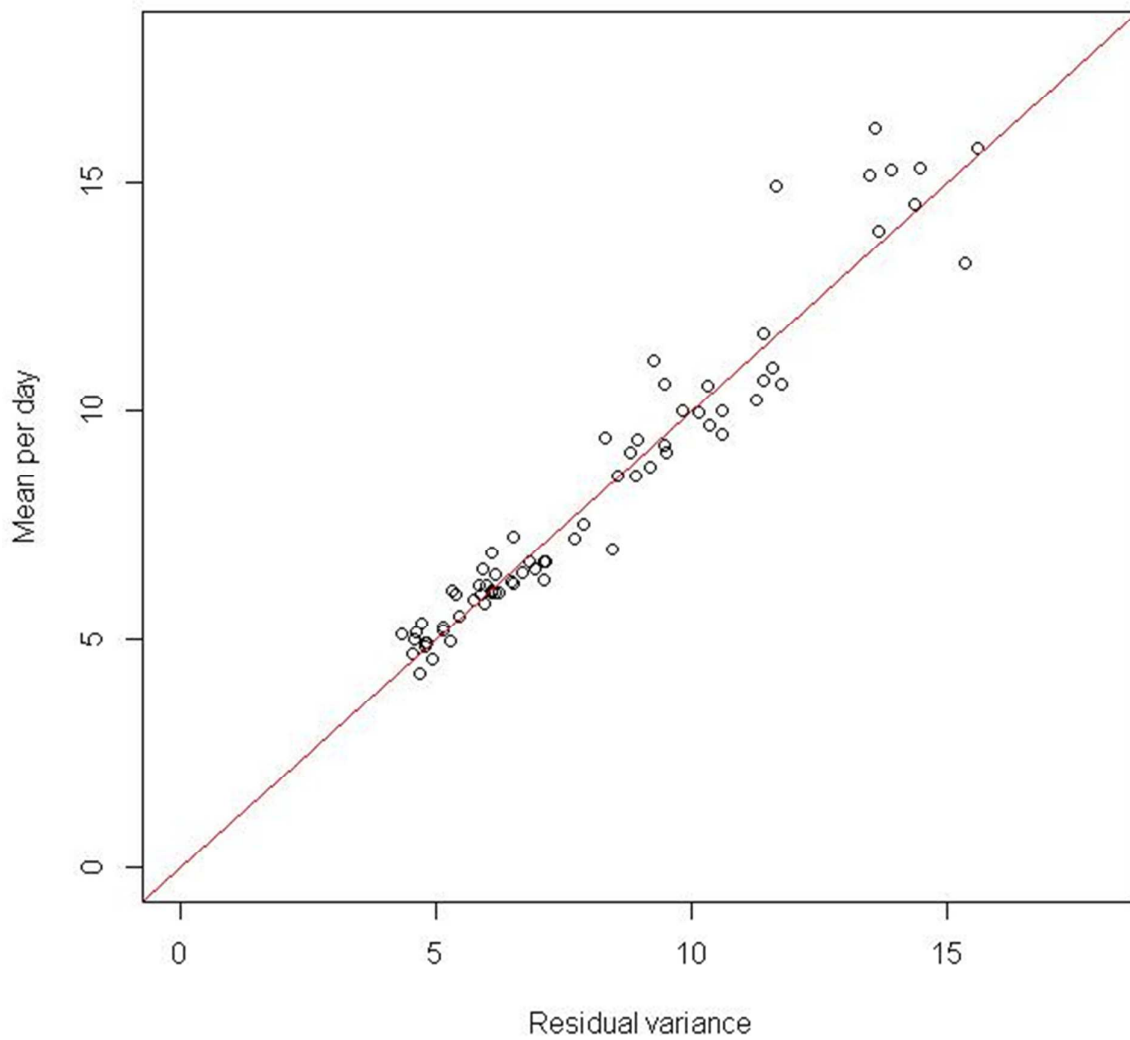

1  
2  
3  
4  
5  
6  
7  
8  
9  
10  
11  
12  
13  
14  
15  
16  
17  
18  
19  
20  
21  
22  
23  
24  
25  
26  
27  
28  
29  
30  
31  
32  
33  
34  
35  
36  
37  
38  
39  
40  
41  
42  
43  
44  
45  
46  
47  
48  
49  
50  
51  
52  
53  
54  
55  
56  
57  
58  
59  
60

1  
2  
3  
4  
5  
6  
7  
8  
9  
10  
11  
12  
13  
14  
15  
16  
17  
18  
19  
20  
21  
22  
23  
24  
25  
26  
27  
28  
29  
30  
31  
32  
33  
34  
35  
36  
37  
38  
39  
40  
41  
42  
43  
44  
45  
46  
47  
48  
49  
50  
51  
52  
53  
54  
55  
56  
57  
58  
59  
60

c)

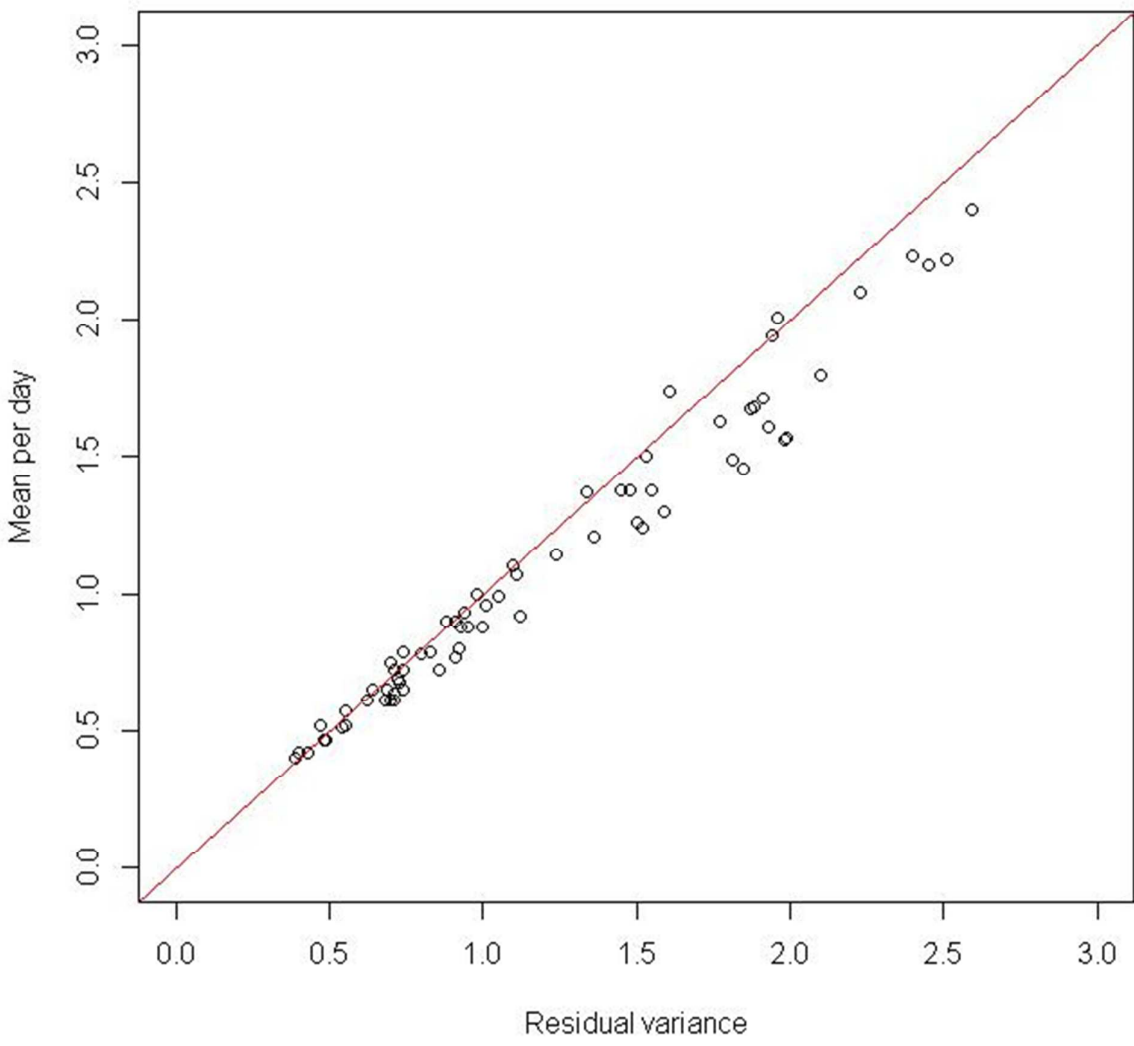

**Table 1** Type of births in each obstetric clinic in the Capital region of Denmark during 2000-2009, with number and percentages of spontaneous births, acute Caesarean sections after spontaneous onset of labour, births after induction of labour and elective Caesarean sections.

| Obstetric clinic  | Births per clinic | Non-elective births (81 %) |    |                 |    | Elective births (19 %) |    |                    |    |
|-------------------|-------------------|----------------------------|----|-----------------|----|------------------------|----|--------------------|----|
|                   |                   | Spontaneous birth          | %  | Acute Caesarean | %  | Induced birth          | %  | Elective Caesarean | %  |
| Rigshospitalet    | 35.657            | 19.144                     | 54 | 5.740           | 16 | 6.345                  | 18 | 4.428              | 12 |
| Hvidovre          | 53.300            | 39.335                     | 74 | 7.264           | 14 | 2.375                  | 4  | 4.326              | 8  |
| Frederiksberg     | 17.751            | 13.784                     | 78 | 1.794           | 10 | 1.266                  | 7  | 907                | 5  |
| Gentofte          | 21.988            | 14.216                     | 65 | 2.863           | 13 | 3.349                  | 15 | 1.560              | 7  |
| Glostrup          | 22.737            | 15.972                     | 70 | 2.883           | 13 | 2.808                  | 12 | 1.074              | 5  |
| Herlev            | 23.967            | 17.352                     | 72 | 2.800           | 12 | 2.680                  | 11 | 1.135              | 5  |
| Hillerød          | 35.890            | 23.209                     | 65 | 4.653           | 13 | 5.133                  | 14 | 2.895              | 8  |
| All seven clinics | 211.290           | 143.012                    | 68 | 27.997          | 13 | 23.956                 | 11 | 16.325             | 8  |

Figure II Exemplification of a small (Gentofte), medium (Herlev) and large (Hvidovre Hospital, abbreviated HH) obstetric clinic with number of births at the x axis and density at the y axis with curves indicating the Poisson distribution (Red) and the normal distribution (Green).

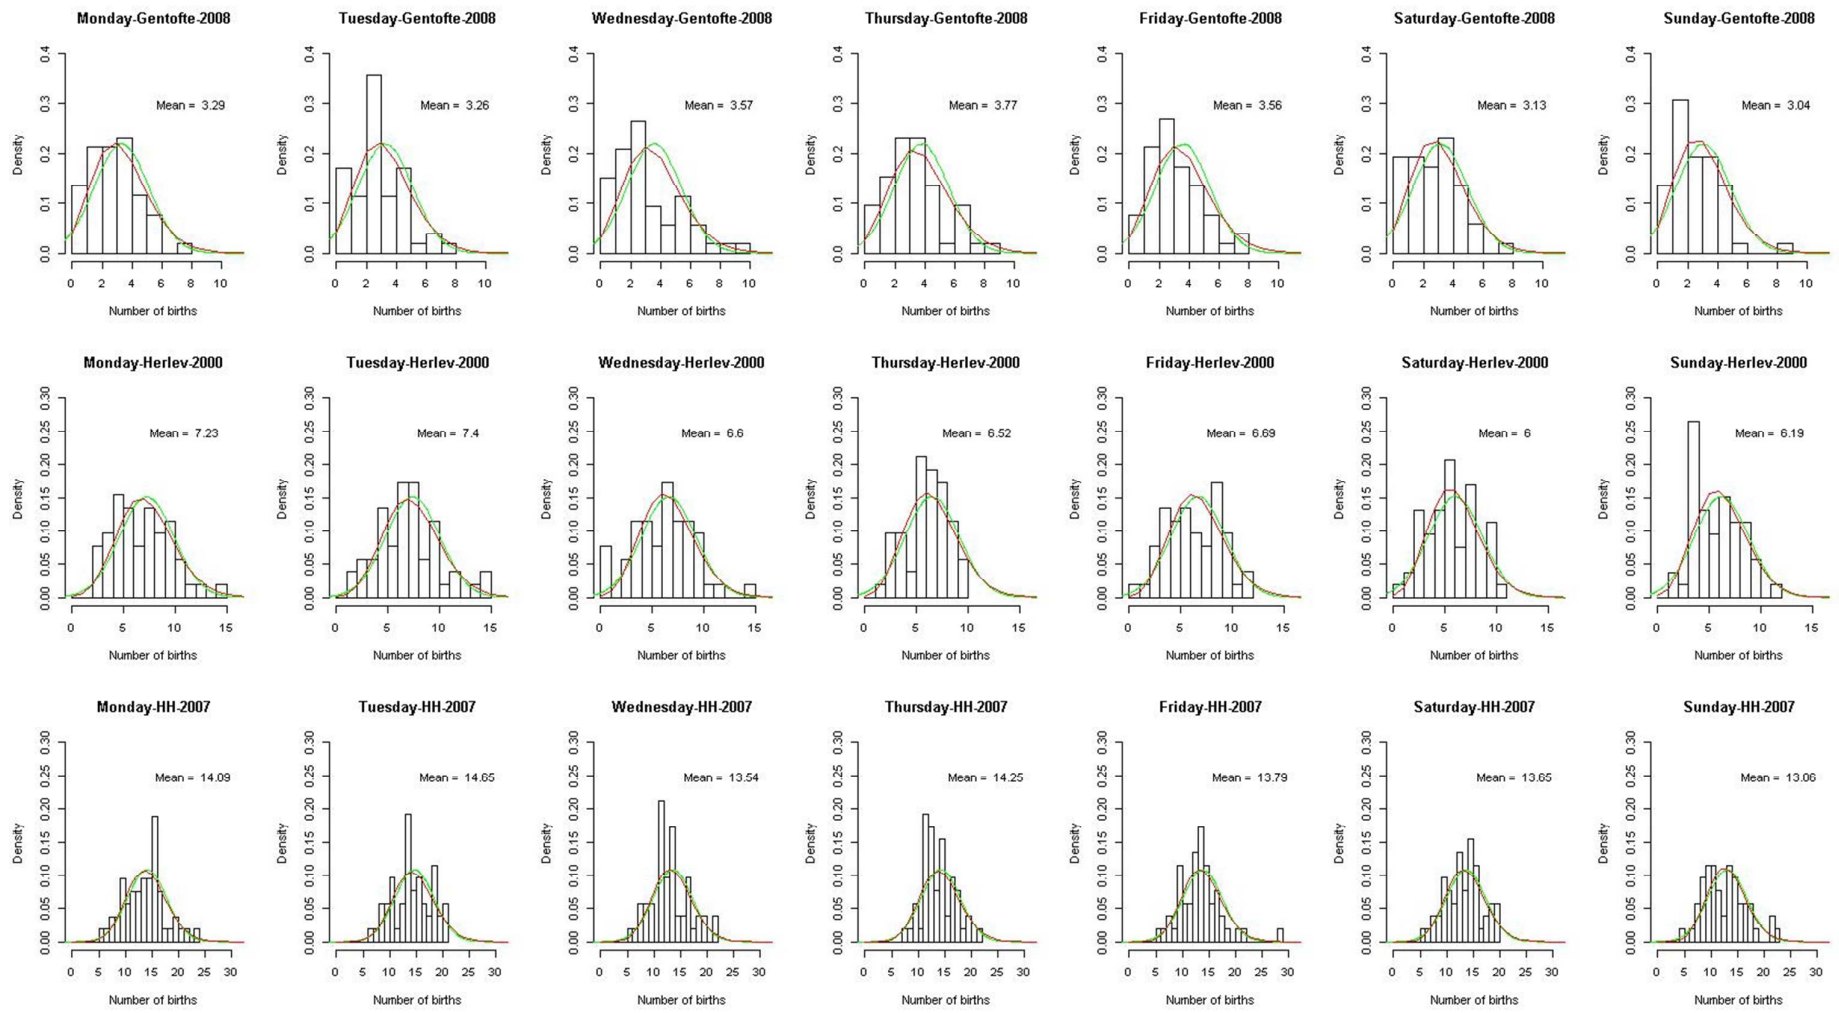

**SUPPLEMENTARY FILE**

Preliminary descriptive analyses of the data clearly indicated that policies concerning planning of elective Caesarean sections and electively induced labour varied considerably over the ten years for each department and that the patterns were rather different between departments, however overall a mid-weekly peak in births remained even when 'elective' births were excluded. The following figures (Figure III-IX) illustrate this finding.

For peer review only



Figure III Number of births on each day of the week for each year in the obstetric clinic of Frederiksberg a) for all births and b) for 'non-elective' births

a)

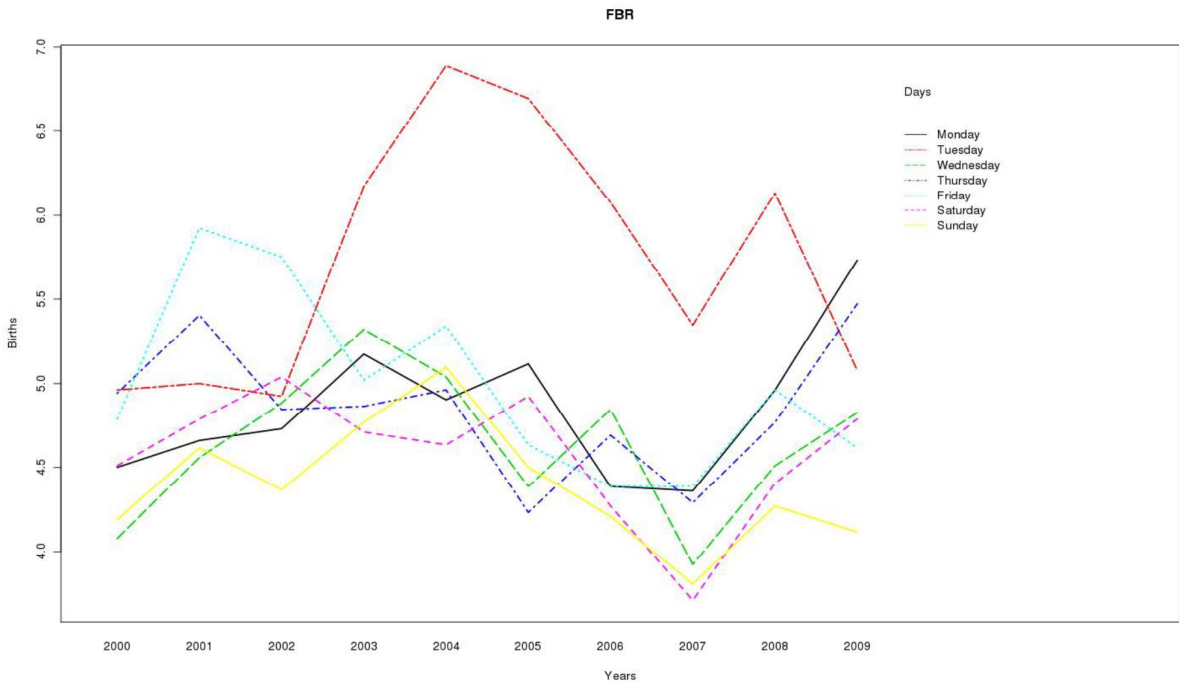

b)

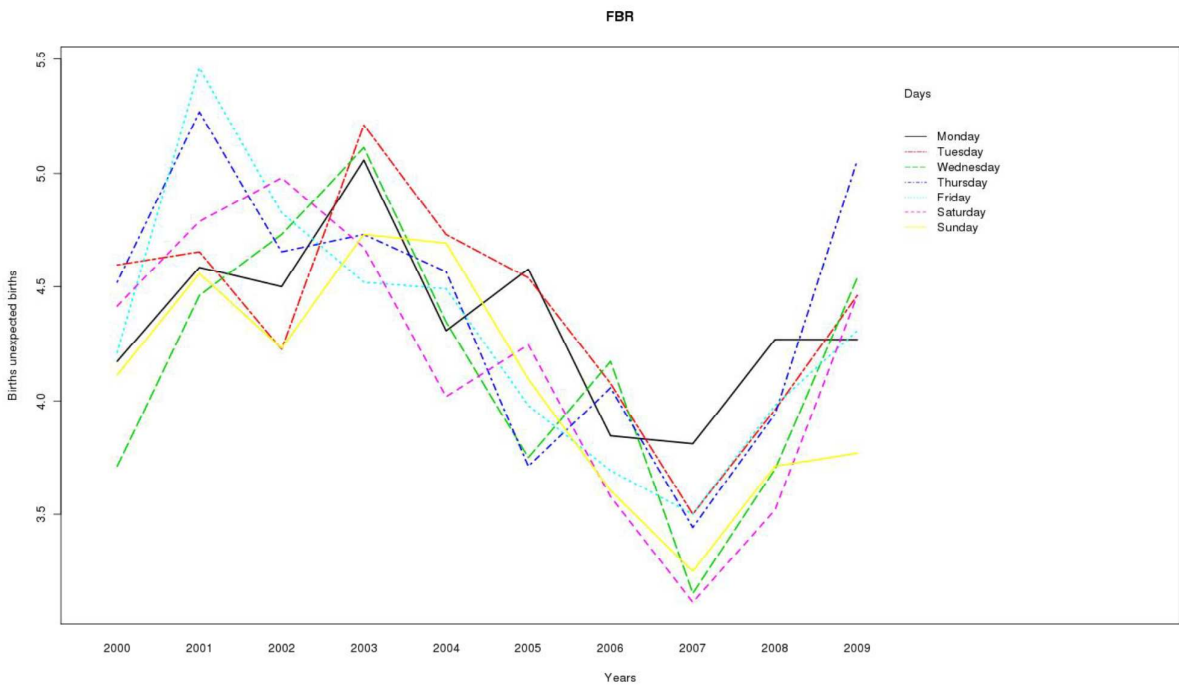

**Figure IV** Number of births on each day of the week for each year in the obstetric clinic of Gentofte a) for all births and b) for 'non-elective' births

a)

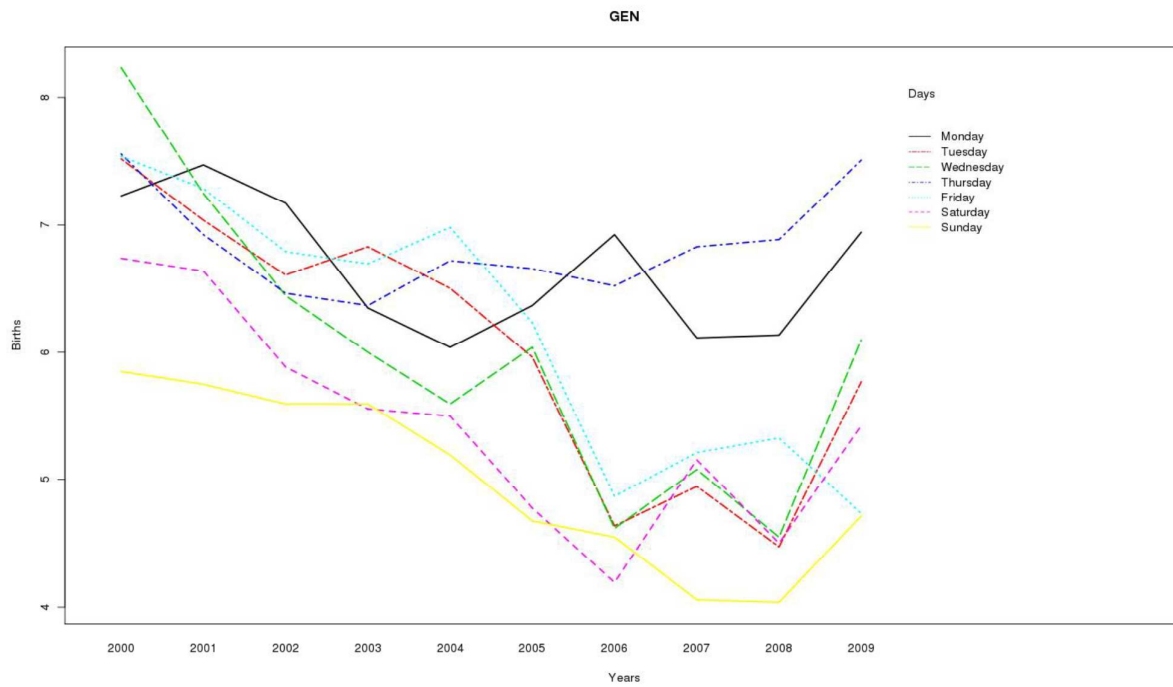

b)

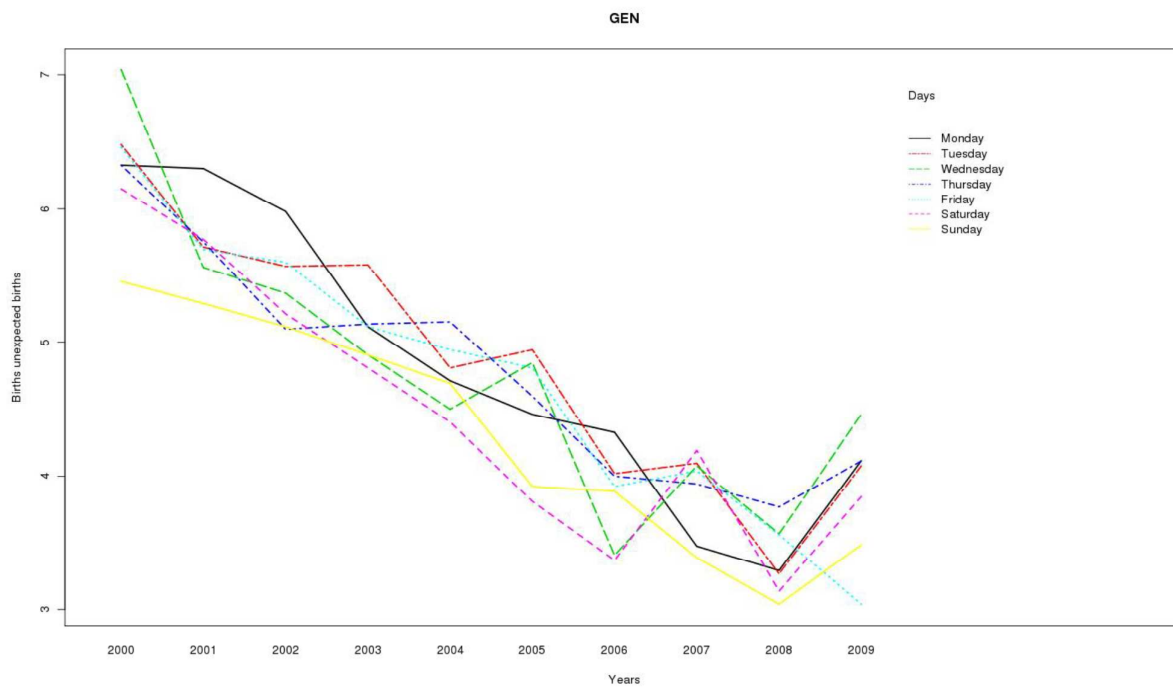

1  
2  
3  
4  
5  
6  
7  
8  
9  
10  
11  
12  
13  
14  
15  
16  
17  
18  
19  
20  
21  
22  
23  
24  
25  
26  
27  
28  
29  
30  
31  
32  
33  
34  
35  
36  
37  
38  
39  
40  
41  
42  
43  
44  
45  
46  
47  
48  
49  
50  
51  
52  
53  
54  
55  
56  
57  
58  
59  
60

**Figure V** Number of births on each day of the week for each year in the obstetric clinic of Glostrup a) for all births and b) for 'non-elective' births

a)

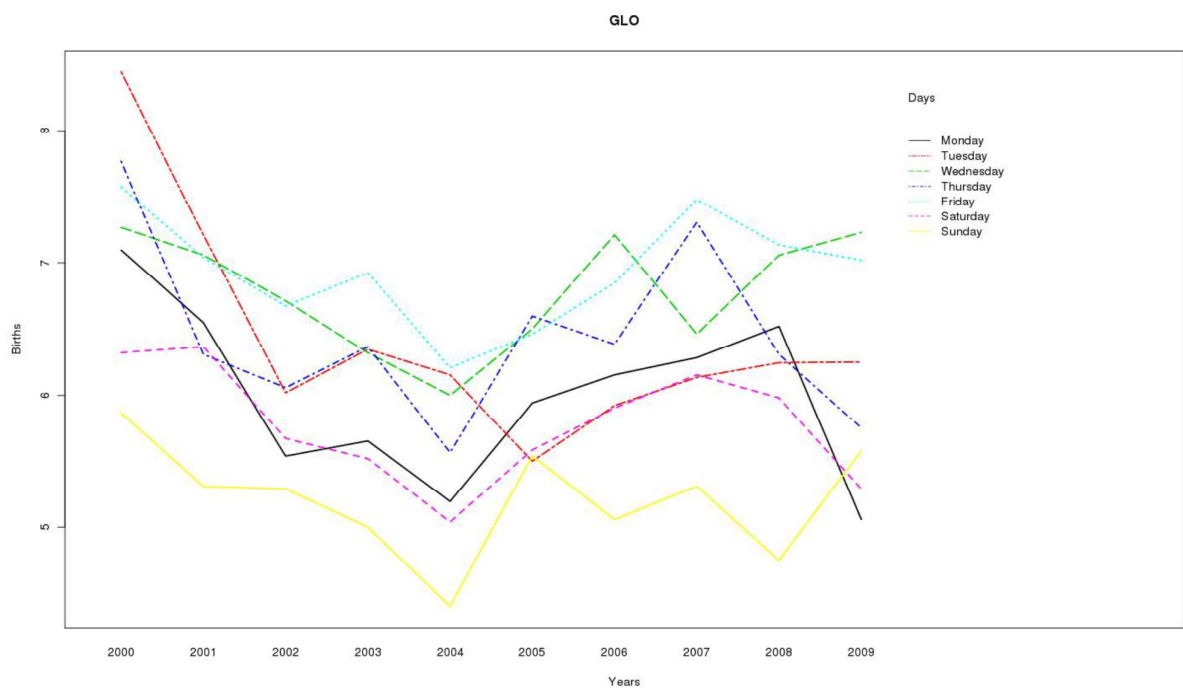

b)

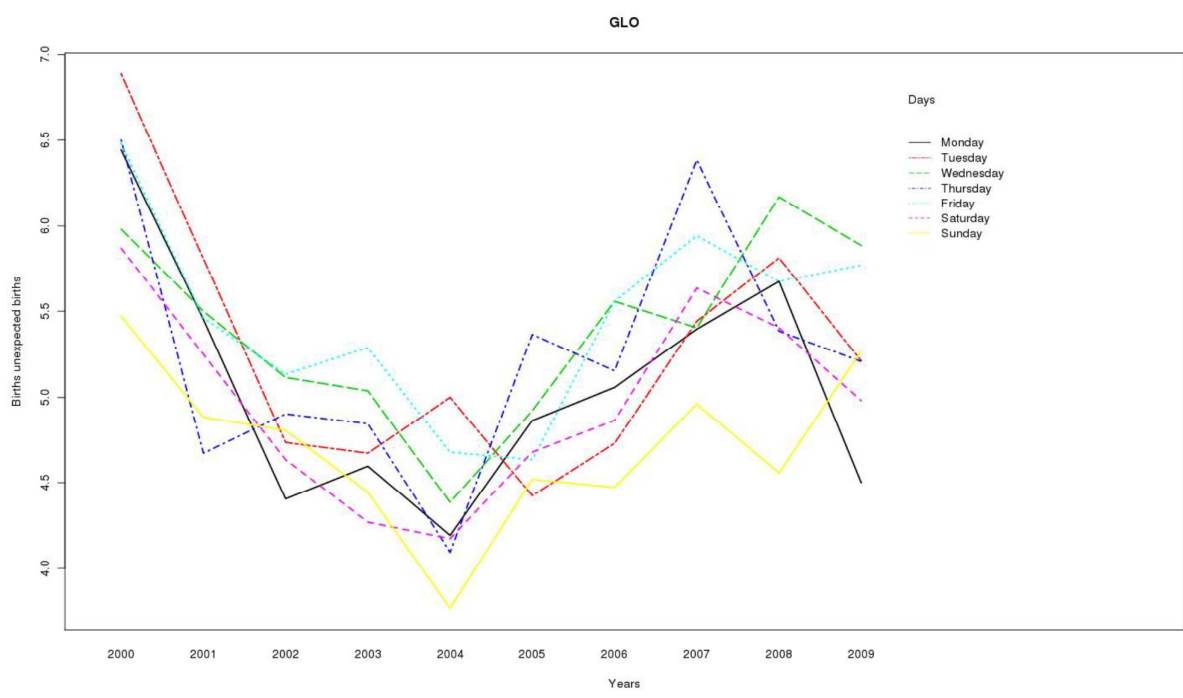

**Figure VI** Number of births on each day of the week for each year in the obstetric clinic of Herlev a) for all births and b) for 'non-elective' births

a)

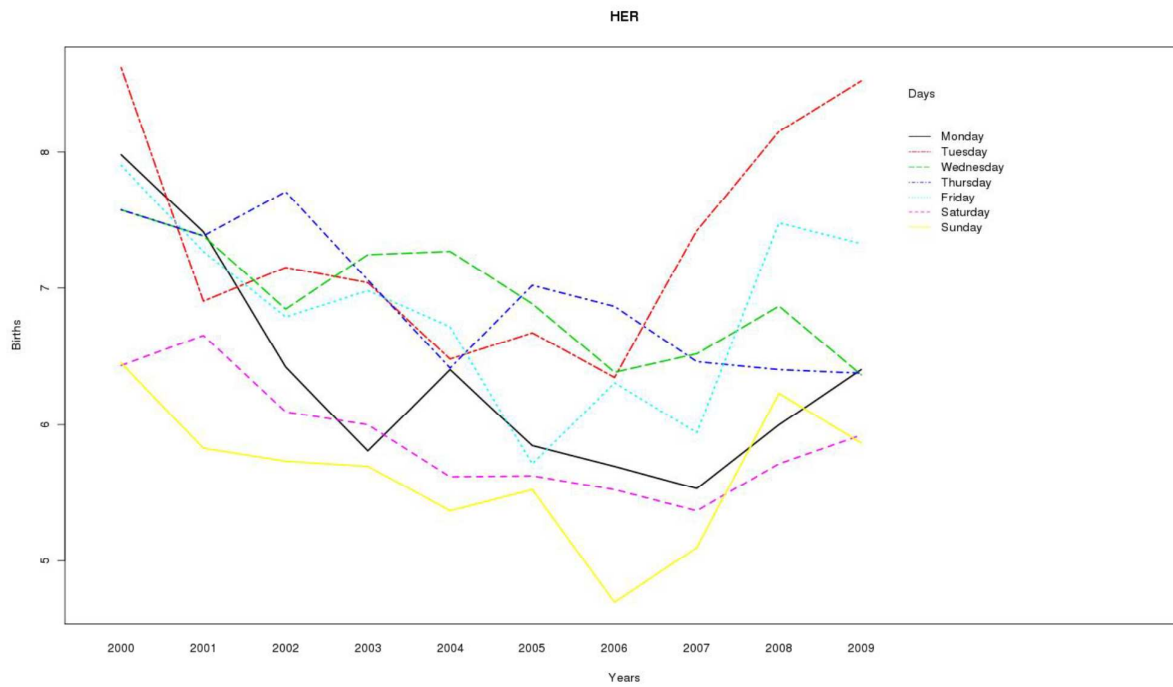

b)

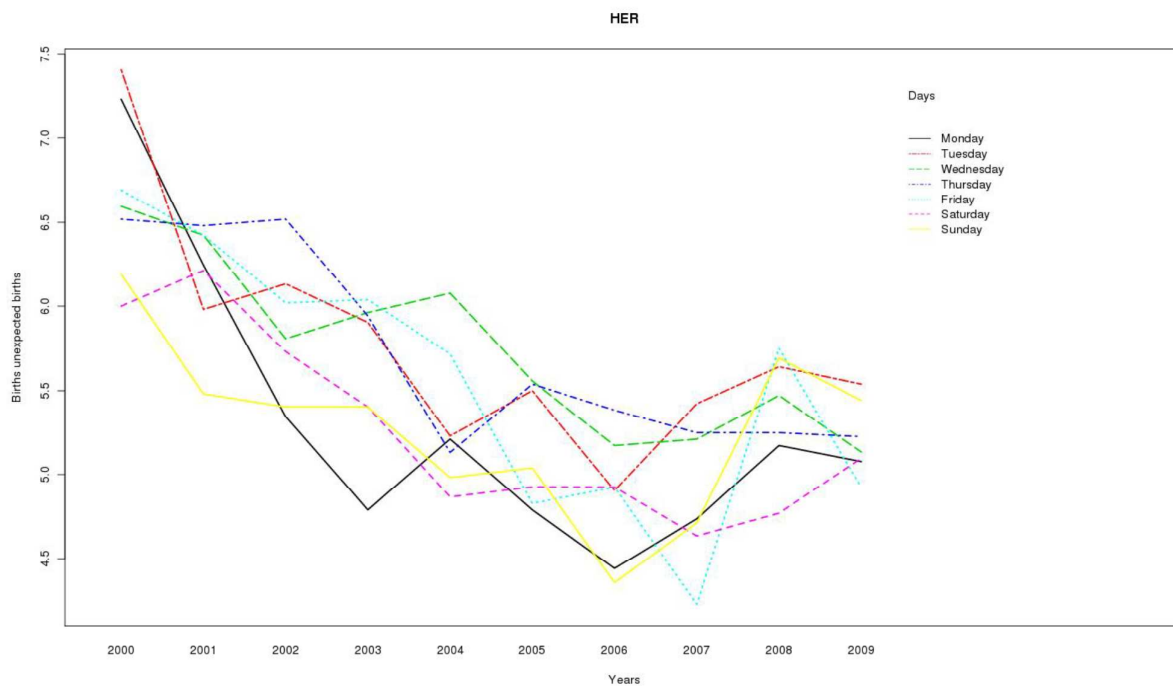

**Figure VII** Number of births on each day of the week for each year in the obstetric clinic of Hillerød a) for all births and b) for 'non-elective' births

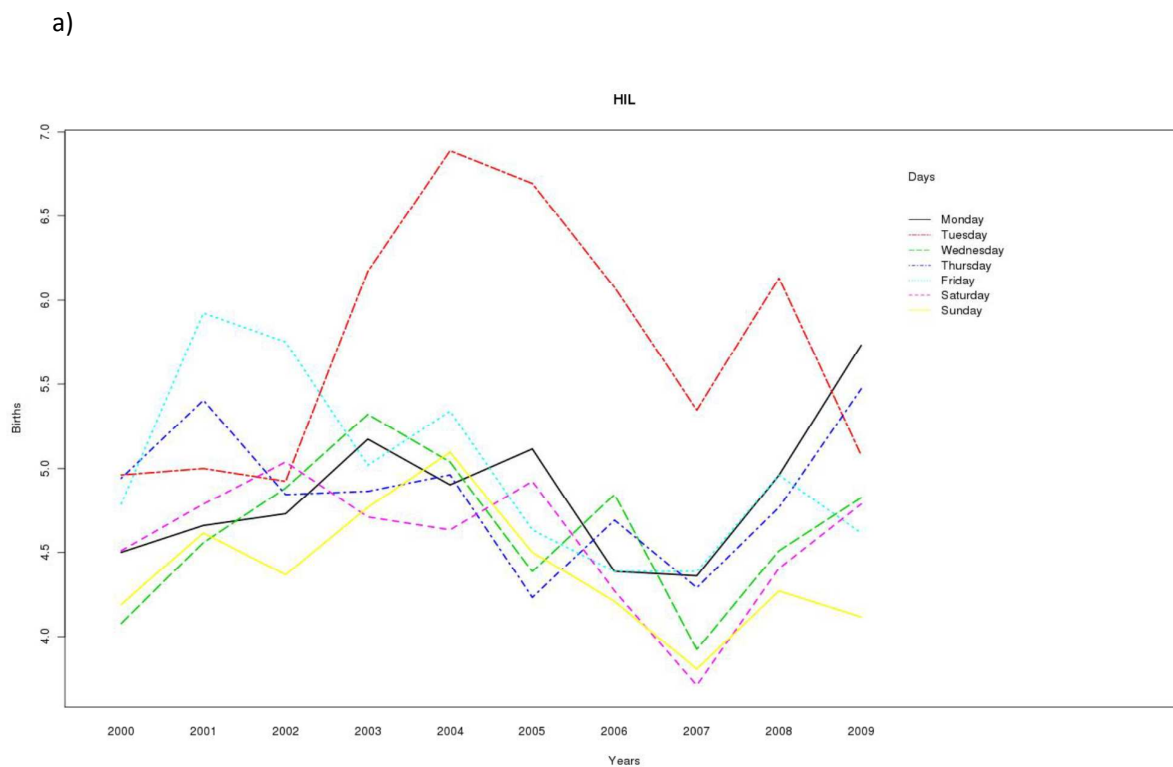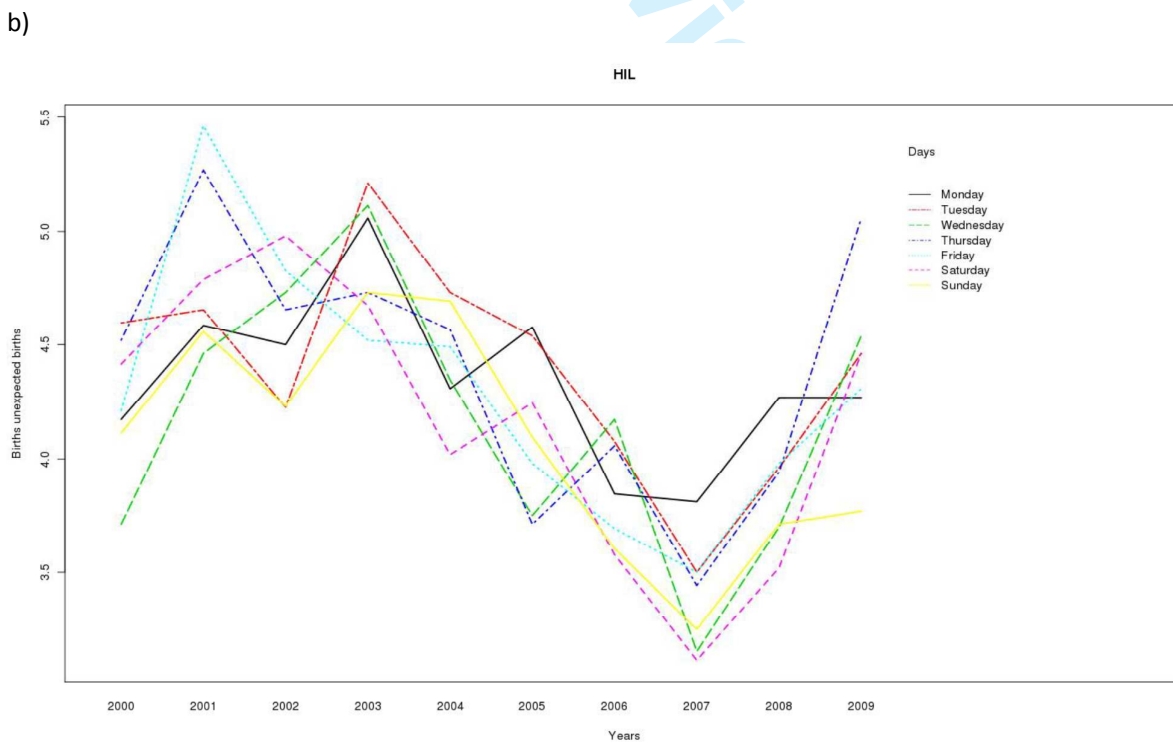

**Figure VIII** Number of births on each day of the week for each year in the obstetric clinic of Hvidovre a) for all births and b) for 'non-elective' births

a)

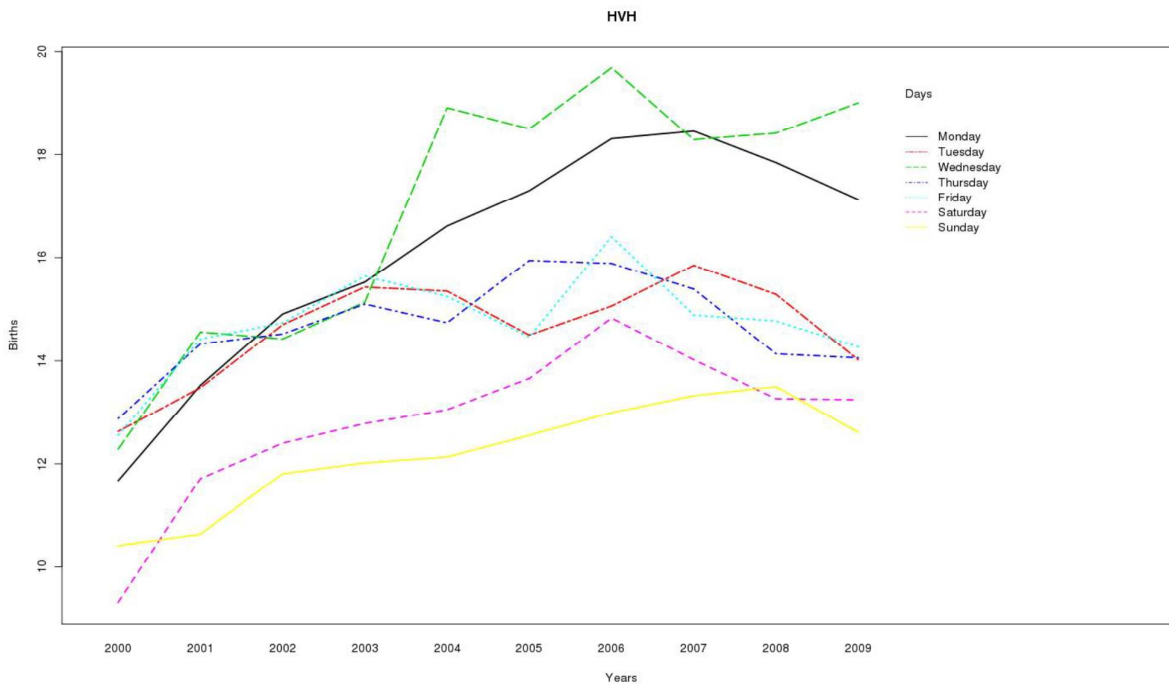

b)

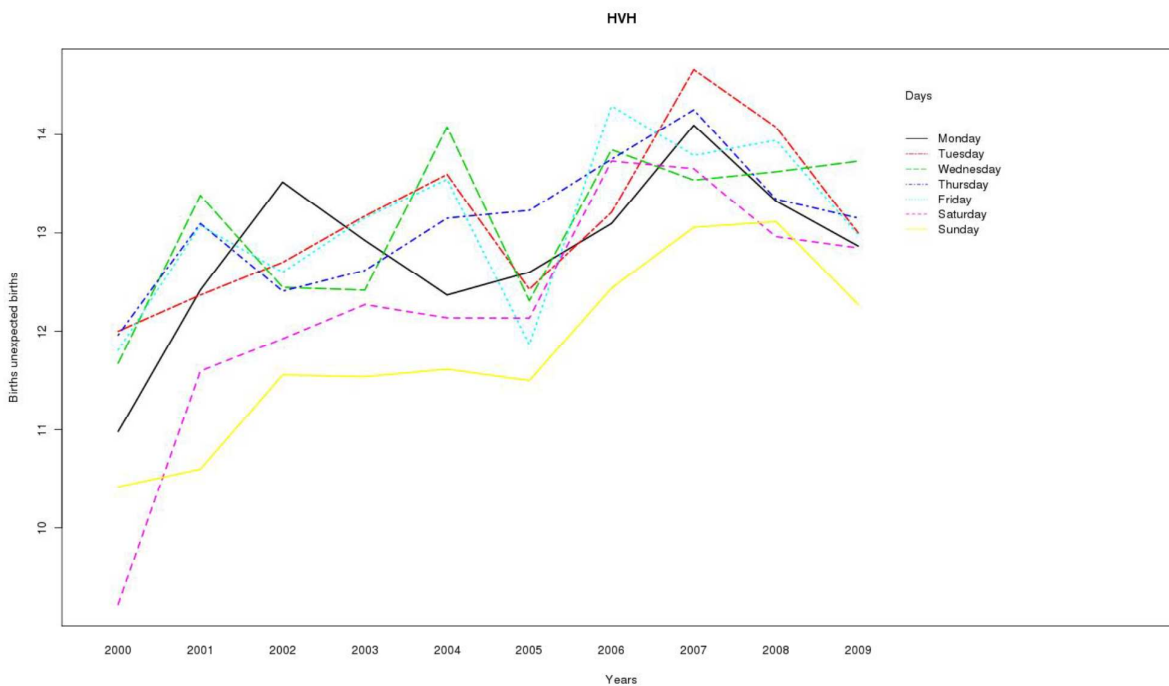

**Figure IX** Number of births on each day of the week for each year in the obstetric clinic of Rigshospitalet a) for all births and b) for 'non-elective' births

a)

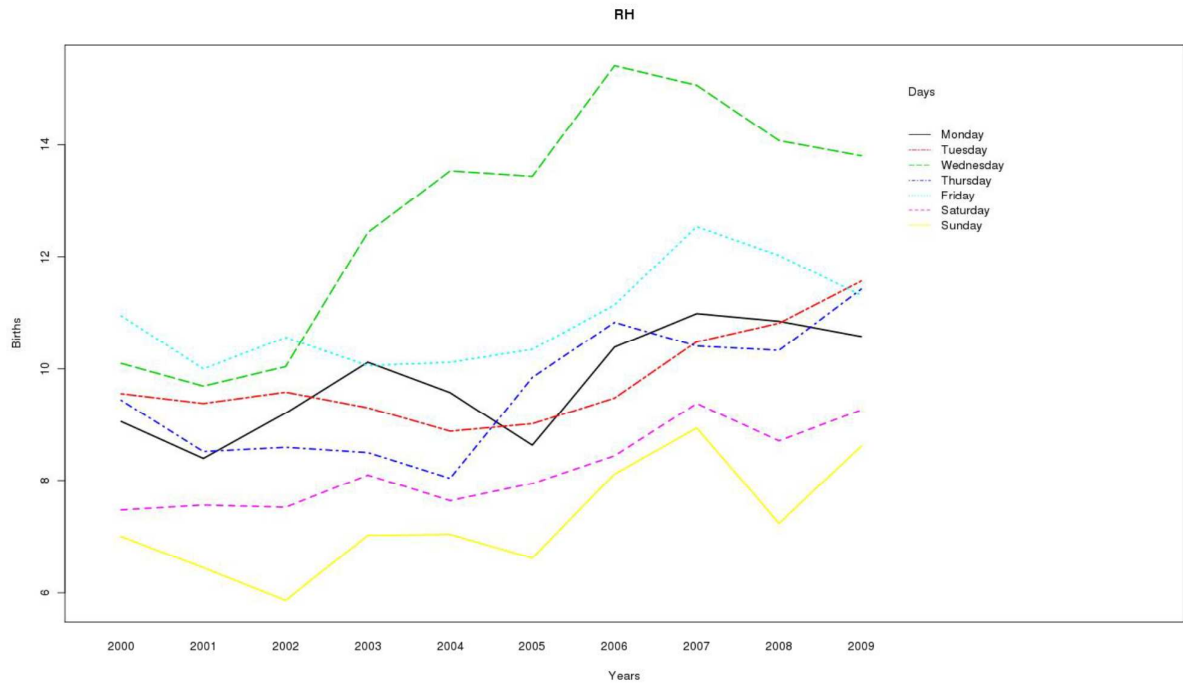

b)

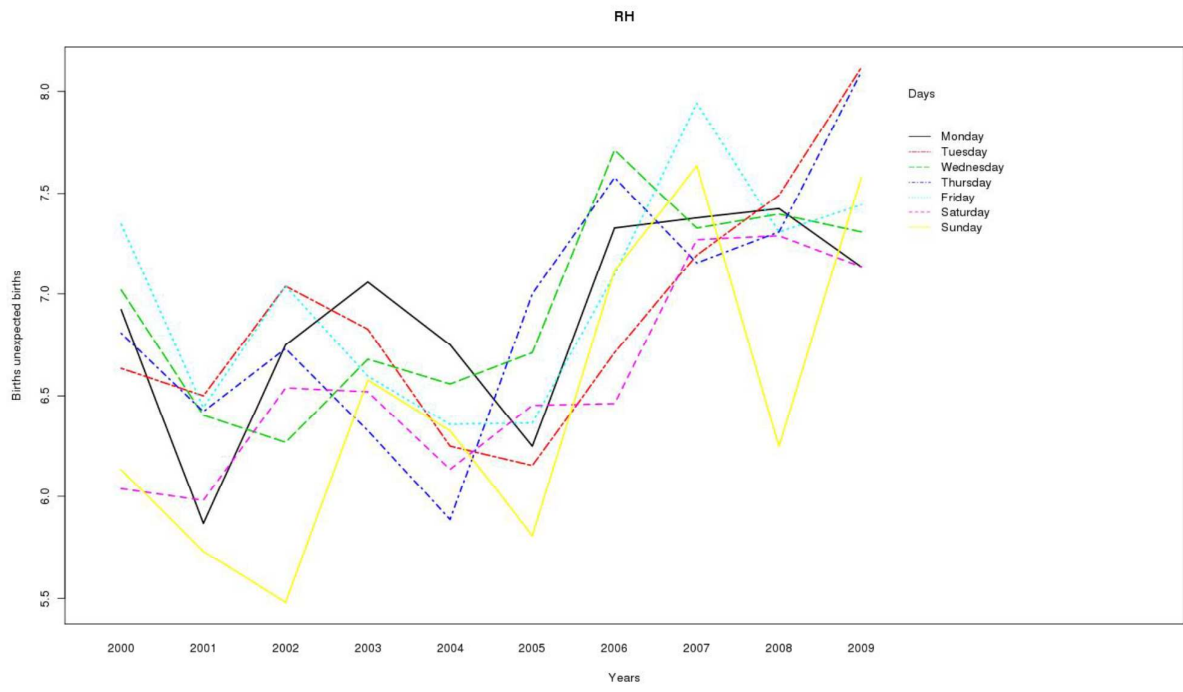

## Licence to BMJ Publishing Group Limited ("BMJ Group") for Publication

To be agreed to by the corresponding author or guarantor on behalf of all authors, ("Corresponding Author"); all authors collectively are referred to as the "Contributors".

In consideration of the BMJ Group, ("the Publisher") considering to publish the article contained within the original manuscript which includes without limitation any diagrams, photographs, other illustrative material, video, film or any other material howsoever submitted by the Contributor(s) at any time and related to the Contribution, ("the Contribution"), certain rights are required to be granted by each different category of author(s), which are as follows:

1. For employees of the **UK Crown acting in the course of their employment**, a non exclusive Licence, as set out below. All provisions of this document apply. The non exclusivity relates to the original submitted manuscript video, films, images, photographs, diagrams and/or illustrative material only).
2. For employees of the **US Federal Government acting in the course of their employment**, no copyright exists and the Contribution is in the public domain so no licence is required to be granted. The Author Warranties below apply (excluding 1.iii).
3. For all other authors, an exclusive Licence, as set out below. All provisions of this document apply.

**NB** where a Contribution is a multi authored work, each author's element of the Contribution will be dealt with in accordance with 1, 2 or 3 above, as applicable.

### The licence

The Licence granted in accordance with 1 or 3 above is:

A worldwide licence to the Publisher and its licensees in perpetuity (subject to the Reversion of Rights set out below), in all forms, formats and media (whether known now or created in the future), to i) publish, reproduce, distribute, display and store the Contribution, ii) translate the Contribution into other languages, create

adaptations, reprints, include within collections and create summaries, extracts and/or, abstracts of the Contribution and convert or allow conversion into any format including without limitation audio, iii) create any other derivative work(s) based in whole or part on the Contribution, iv) to exploit all subsidiary rights that currently exist or as may exist in the future in the Contribution, v) the inclusion of electronic links from the Contribution to third party material where-ever it may be located; and, vi) licence any third party to do any or all of the above.

If you and/or any co-author's employer own the copyright to the Contribution, you must obtain in writing, the relevant employers' consent to grant the licence and agree to all obligations herein. The author(s) hereby agree that, in the event that the BMJ Group sell the whole or part of its journal business to any third party, the benefit and the burden of the Licence contained herein shall be assigned to that third party.

### Additional rights and obligations

The author(s) (and their employers as applicable), hereby authorise the Publisher to take such steps as they consider necessary at their own expense in the copyright owner's name and on their behalf, if they believe that a third party is infringing or is likely to infringe copyright or the rights granted to the Publisher herein in the Contribution without further recourse to the copyright owner(s).

For **Unlocked** articles (as defined below), the Publisher expressly agree to place the published Contribution for display on PubMed Central (including their international mirror sites) promptly after allocation of an issue number and thereafter publication, without extra charge for this deposit to the authors or their employers (provided PubMed Central does not charge the Publisher), which will include any Publisher supplied amendments or retractions.

**"Unlocked"** means where the author or their employer or other institution has agreed with the Publisher that this Contribution should be considered an Open Access contribution and has paid the Publisher the standard rate in force.



1  
2  
3  
4  
5  
6  
7  
8  
9  
10  
11  
12  
13  
14  
15  
16  
17  
18  
19  
20  
21  
22  
23  
24  
25  
26  
27  
28  
29  
30  
31  
32  
33  
34  
35  
36  
37  
38  
39  
40  
41  
42  
43  
44  
45  
46  
47  
48  
49  
50  
51  
52  
53  
54  
55  
56  
57  
58  
59  
60

“**Locked**” articles are all other articles including Research Funded articles.

“**Research Funded**” articles are Locked Articles but which have been funded wholly or substantially by a funding organisation listed on our manuscript submission website under “Recognised Funders.”

The author(s) acknowledge and accept that BMJ Group may make additional changes to the Contribution as considered necessary in accordance with standard editorial processes whether before or after publication. The Corresponding Author will usually see proofs for their Contribution and every effort will be made to consult with the Corresponding Author if substantial alterations are made. The BMJ Group may also retract or publish a correction or other notice when it considers this appropriate for legal or editorial reasons and this shall be at its absolute discretion which shall be exercised reasonably.

### Reversion of rights

If the Contribution is not published in the print or electronic versions of the Journal or any other Publisher’s products within 12 months of final acceptance by the BMJ Group, (or as otherwise agreed in writing), any Licence granted herein shall automatically terminate and all rights shall revert to the copyright owner. The Publisher may keep a copy of the Contribution as a record (including via any contractor).

### Rights granted to owners of the contribution

Ownership of copyright remains with the author(s) or their employers if they are acting in the course of their employment. All rights not expressly granted are, subject to the Licence terms, reserved by the Publisher. In return for the grant of the Licence herein, the copyright owner(s) shall have the following rights for **non-Commercial Use (unless otherwise stated)** of the Contribution:

1. The right to reproduce a reasonable number (no more than 100) print copies of the final Contribution, by copying or downloading from the BMJ Group website, for personal use and to send copies to colleagues in print or electronic form

provided no fee is charged and this is not done on a systematic basis (which includes via mass e-mailings).

2. The right to include the Contribution in a compilation for classroom use (course packs) to be distributed free of charge (other than for direct photocopying cost) to students at the Contributor(s)’s institution or to be stored in digital format in data rooms for access by students as part of their course work and for in house training programmes of the Contributor(s)’s employer or at seminars or conferences subject to a limit of 100 copies per conference or seminar.
3. The right to i) to post the accepted manuscript (but not the final published version of the Contribution), and the abstract of the final published Contribution on the Contributor(s)’s own and/or his/her institution’s website, 6 months after the print publication date or if not published in print, from being published online, ii) where the article is “Unlocked” for copyright owners to publish the final published Contribution and abstract, as published by the Publisher, in any media from the date of publication for non Commercial Use; and iii) for Research Funded Articles only, the right for the Contributor (s)’s to place the accepted manuscript on PubMed Central (including their international mirror sites) after an embargo period of 12 months from the date of Publication unless otherwise stated on our manuscript submission website under “Recognised Funders”.

The following statements must accompany the articles posted on the Contributor(s)’s and/or his/her institution’s website:

#### Locked and research funded articles acknowledgement

This article has been accepted for publication in [**Contributor, please insert journal name**]. The definitive copyedited, typeset version [**Contributor please insert complete citation information when**

*available*] is available online at: [www. \[Contributor please insert as applicable\].com](http://www.[Contributor please insert as applicable].com)

#### Unlocked article acknowledgement

This article has been accepted for publication in [*Contributor please insert full citation*] following peer review and can also be viewed on the journal's website at [www. \[Contributor please insert as applicable\].com](http://www.[Contributor please insert as applicable].com)

In addition, for Unlocked articles copyright owners (and the Publisher) may allow third parties to use the Contribution in accordance with the Creative Commons Attribution Non Commercial 2.0 licence – see

<http://creativecommons.org/licenses/by-nc/2.0/> and <http://creativecommons.org/licenses/by-nc/2.0/legalcode>

subject to ensuring that the Publisher and Journal are referenced (including a full citation), all third party rights within all images, diagrams, photographs, other illustrative material or films not owned by the authors or BMJ Group are cleared independently and appropriately and all Publisher's trademarks are removed from any derivative works and ensuring any translations, for which a prior translation agreement with BMJ Group has not been established, must prominently display the statement:

"This is an unofficial translation of an article that appeared in a BMJ Group publication. BMJ Group has not endorsed this translation."

4. The right to publish with the necessary acknowledgement of the Publisher and the Journal, all or part of the material from the published Contribution in a book essay, position paper, or other non peer reviewed publication authored or edited by the Contributor(s)'s (which may be a Commercial Use). This does not apply to multiple Contributions in the same journal, for which permission from the Publisher must be sought.
5. The right to use selected figures and tables (of which the author or his employer owns or has licensed) and selected text (up to 300 words) from the Contribution for incorporation within another work published in print or digital format by a third party, so long as full credit is given to the Publisher and use of the parts of the

Contribution is non Commercial Use.

6. The right to receive a royalty for up to 5 years from publication of 10% of any net receipts less sales commission on single orders in excess of £2000 received by the Publisher for any single Contribution reprint or translation sales to a single third party, subject however to any fee being determined (if charged) at the absolute discretion of the Publisher as may be altered from time to time. If the Publisher receives such an order for reprint sales of the Contribution, they will contact the Corresponding Author at the address given on the published Contribution to find out to whom payment should be made. Corresponding Authors have the responsibility to ensure that all authors have agreed what should be done with any such royalty payment.

For permission to use materials that are beyond uses permitted here, visit

<http://group.bmj.com/group/rights-licensing/permissions>.

"Commercial Use" includes:

- copying or downloading of documents, or linking to such postings, for further redistribution, sale or licensing, for a fee;
- copying, downloading or posting by a site or service that incorporates advertising with such content;
- the inclusion or incorporation of document content in other works or services (other than for legally permitted quotations with an appropriate citation) that is then available for sale or licensing, for a fee.
- use of documents or document content (other than for legally permitted quotations with appropriate citation) by organisations for any promotional or advertising purposes whether direct or indirect, whether for a fee or otherwise. Distribution by or on behalf of pharmaceutical organisations is considered in all cases as Commercial Use;
- use for the purposes of monetary reward by means of sale, resale, license, loan, hire transfer or other form of commercial exploitation.

### Author warranties

The author(s) warrant that: i) they are the sole author(s) of the Contribution which is an original work; ii) the whole or a substantial part of the Contribution has not previously been published; iii) they or their employers are the copyright owners of the Contribution; iv) to the best of their knowledge that the Contribution does not contain anything which is libellous, illegal or infringes any third party's copyright or other rights; v) that they have obtained all necessary written consents for any patient information which is supplied with the Contribution; and vi) that they have declared or will accurately declare all competing interests to the Publisher.

### Law and jurisdiction

This Agreement shall be governed by and construed in accordance with the laws of England without regard to the principles of conflicts of law. The parties hereto submit to the exclusive jurisdiction of the English courts.

### The following statement must be included in your manuscript (other than for US Federal Government Employees acting in the course of their employment):

"I [*insert full name*] The Corresponding Author of this article contained within the original manuscript which includes any diagrams & photographs and any related or stand alone film submitted (the Contribution") has the right to grant on behalf of all authors and does grant on behalf of all authors, a licence to the BMJ Publishing Group Ltd and its licensees, to permit this Contribution (if accepted) to be published in any BMJ Group products and to exploit all subsidiary rights, as set out in our licence set out at:

[http://group.bmj.com/products/journals/instructions-for-authors/wholly\\_owned\\_licence.pdf](http://group.bmj.com/products/journals/instructions-for-authors/wholly_owned_licence.pdf)

### IF YOU ARE A NATIONAL INSTITUTE OF HEALTH ("NIH") EMPLOYEE, CONTRACTOR OR TRAINEE

**ADD:** I am a National Institute of Health ("NIH") employee, contractor or trainee, and the following cover sheet will be accepted by the BMJ Group and NIH and incorporated into the above Licence

<http://group.bmj.com/products/journals/instructions-for-authors/nihcoversheet.pdf> .

### The following statement must be included in your manuscript for US Federal Government employees acting in the course of their employment:

"I [*insert full name*] The Corresponding Author has the right on behalf of all Contributors to seek publication by the BMJ Group of all content within the submitted Contribution or as later submitted (which includes without limitation any diagrams, photographs, other illustrative material, video, film or any other material howsoever submitted by any of the Contributors at any time and related to this article) and to grant the warranties all as fully set out here:

[http://group.bmj.com/products/journals/instructions-for-authors/wholly\\_owned\\_licence.pdf](http://group.bmj.com/products/journals/instructions-for-authors/wholly_owned_licence.pdf)

Please tick **one or more** boxes as appropriate:

- I am the sole author of the Contribution.
- I am one author signing on behalf of all co-authors of the Contribution.
- The Contribution has been made in the course of my employment and I am signing as authorised by my employer.
- I am a US Federal Government employee acting in the course of my employment.
- I am not a US Federal Government employee, but some or all of my co-authors are.
- I am an employee of the UK Crown acting in the course of my employment.\*
- I am not an employee of the UK Crown acting in the course of my employment but some/all of my co-authors are.\*

\*Such authors should consult the attached guidance and if necessary return any completed form; see

<http://www.nationalarchives.gov.uk/documents/information-management/articles-ministers-civil-servants-annexa.pdf>



**A MODEL FOR THE DISTRIBUTION OF DAILY NUMBER OF BIRTHS IN OBSTETRIC CLINICS BASED ON A DESCRIPTIVE RETROSPECTIVE STUDY**

|                                 |                                                                                                                                                                                                                                                                                                                                                                                 |
|---------------------------------|---------------------------------------------------------------------------------------------------------------------------------------------------------------------------------------------------------------------------------------------------------------------------------------------------------------------------------------------------------------------------------|
| Journal:                        | <i>BMJ Open</i>                                                                                                                                                                                                                                                                                                                                                                 |
| Manuscript ID:                  | bmjopen-2013-002920.R2                                                                                                                                                                                                                                                                                                                                                          |
| Article Type:                   | Research                                                                                                                                                                                                                                                                                                                                                                        |
| Date Submitted by the Author:   | 29-Jul-2013                                                                                                                                                                                                                                                                                                                                                                     |
| Complete List of Authors:       | Gam, Christiane; Hillerød Hospital, Copenhagen University Hospital, Department of Gynecology and Obstetrics<br>Tanniou, Julien; University of Copenhagen, Department of Biostatistics<br>Keiding, Niels; University of Copenhagen, Department of Biostatistics<br>Løkkegaard, Ellen; Hillerød Hospital, Copenhagen University Hospital, Department of Gynecology and Obstetrics |
| <b>Primary Subject Heading</b>: | Medical management                                                                                                                                                                                                                                                                                                                                                              |
| Secondary Subject Heading:      | Evidence based practice, Obstetrics and gynaecology                                                                                                                                                                                                                                                                                                                             |
| Keywords:                       | Human resource management < HEALTH SERVICES ADMINISTRATION & MANAGEMENT, Organisation of health services < HEALTH SERVICES ADMINISTRATION & MANAGEMENT, OBSTETRICS                                                                                                                                                                                                              |
|                                 |                                                                                                                                                                                                                                                                                                                                                                                 |

SCHOLARONE™  
Manuscripts

only

1  
2  
3 **A MODEL FOR THE DISTRIBUTION OF DAILY NUMBER OF BIRTHS IN OBSTETRIC CLINICS BASED ON A DESCRIPTIVE**  
4 **RETROSPECTIVE STUDY**  
5

6 Christiane M. B. Gam<sup>1</sup>, Julien Tanniou<sup>2</sup>, Niels Keiding<sup>2</sup> and Ellen L. Løkkegaard<sup>1</sup>  
7  
8  
9  
10  
11  
12  
13  
14  
15  
16  
17  
18  
19  
20  
21  
22  
23

24 **Contact information**

25 Christiane Marie Bourgin Gam, MD, Ph.D. fellow

26 Ellen Leth Løkkegaard, MD, Ph.D.

27 Department of Gynaecology and Obstetrics, Hillerød Hospital<sup>1</sup>

28 Dyrehavevej 29

29 DK-3400 Hillerød

30 (+45) 40 74 13 39

31 [christiane.gam@sund.ku.dk](mailto:christiane.gam@sund.ku.dk)  
32  
33  
34  
35  
36  
37  
38

39 Niels Keiding, professor in biostatistics

40 Julien Tanniou, statistician, Ph.D. fellow

41 Department of Biostatistics, University of Copenhagen<sup>2</sup>

42 Øster Farimagsgade 5,

43 P.O.B. 2099

44 DK-1014 Copenhagen K  
45  
46  
47  
48  
49

50 *Keywords:* distribution, births, model, Poisson, staffing, obstetric clinic

51 *Word count:* 2427  
52  
53  
54  
55  
56  
57  
58  
59  
60

## ABSTRACT

*Objective:* To test whether the relatively unpredictable nature of labour onset can be described by the Poisson distribution.

*Design:* A descriptive retrospective study.

*Setting:* From the Danish Birth Registry we identified births from all seven obstetric clinics in the Capital region of Denmark (n=211,290) between 2000 and the end of 2009. On each date the number of births at each department was registered. Births are categorised in whether an elective Caesarean section or induction of labour has been performed and among the remaining 'non-elective births' acute Caesareans were registered.

*Methods:* After exclusion of elective Caesarean sections and births after induction of labour only 'non-elective' births (n=171,009) were included for the main statistical analysis. Simple descriptive plots and one-way analysis of variance were used to analyse the distribution of 'non-elective' births for each day of the week.

*Main outcome measures:* The daily number of 'non-elective' births.

*Results:* The number of 'non-elective' births varies considerably over the days of the week and over the year for each obstetric clinic regardless of clinic size. However, for each fixed day of the week the variation over the year is well described by a Poisson distribution, allowing simple prediction of the variability. For births at each fixed day of the week, the Poisson distribution is indistinguishable from a normal distribution.

*Conclusion:* The number of 'non-elective' births for each day of the week is well-described by a Poisson distribution. Consequently the Poisson model is suitable for estimating the variation in the daily number of 'non-elective' births and could be used for planning of staffing in obstetric clinics. The model can be used in smaller as well as larger clinics.

## ARTICLE SUMMARY

*Article focus:* Does the Poisson distribution correspond precisely to actual random variation in the number of 'non-elective' births for each fixed day of the week?

*Key Message box:*

- For each day of the week, the variation of 'non-elective' births over the year is well described by a Poisson distribution.
- The Poisson distribution makes it easy to estimate the variation in the daily number of births and can be used for planning of staffing in obstetric clinics. Standard tables of the normal distribution may be used as exemplified.
- The model is adequate for use in smaller as well as larger clinics and can be used in management of staffing in obstetric clinics.

*Strengths and limitations of this study:* The main strength is the large dataset of non-selected births. The main limitation is that births are registered only by date, not by time of birth.

## INTRODUCTION

There is a structural reorganization of hospitals going on in Denmark implying larger but fewer hospitals. This applies also for the departments of Gynaecology and Obstetrics as smaller departments are being merged resulting in fewer larger departments (1-3). The main motivation for these changes has been that larger departments would enhance the capacity and quality of patient treatment and additionally reduce the costs for staff at shifts. In Denmark the overall year to year variation in number of births at each department is centrally determined as each department of Gynaecology and Obstetrics on an administrative level is intended to have a given number of births from a specified geographical region and therefore the staffing required in each obstetric clinic in each department is determined from this figure. The largest part of staffing consists of a daily number of midwives working eight hours shift during day, evening and night, as well as a varying number of midwives on 24 hour duty on call from home. Their actual working hours vary considerably. The number of doctors on shift is fixed for each obstetric clinic and depends on the size of the obstetric clinic, as does the number of doctors on call from home.

An interesting organizational feature in obstetrics is the inherent random variation in onset of spontaneous labour which makes it difficult to precisely plan the necessary number of staff at the obstetric clinics. The planning of staffing in the departments is to our knowledge not based on published methods. Statistics on the number of births on each day for each department every year is available online from Statistics Denmark (4). These numbers indicate considerable day to day variation and week to week variation. The observation of a weekly cycle is in accordance with reports from other countries such as England, Wales, Australia, the United States, Israel and Norway (5-13) and interestingly it has also been shown that the variation depends on whether the Sabbath occurs on a Friday (14), a Saturday (5) or Sunday (6-13). However these former studies included all births regardless of whether or not there had been an elective obstetric intervention, which raises the question whether the variation between the days of the week disappears, when births resulting from an elective obstetric intervention as elective Caesarean or induction of labour are excluded from the data set. There is a long tradition of describing the variation in the daily demand for hospital beds by the Poisson distribution (15-17) sometimes based on queuing theory and with varying efforts at empirical verification. In her well-known textbook Kirkwood (18) used an apparently hypothetical example of staffing planning in the face of merging two obstetrical departments to illustrate the Poisson distribution.

In this study we examine from a broad Danish experience how well the Poisson distribution corresponds to actual random variation in the number of 'non-elective' births for each fixed day of the week. Since the variation in the 'non-elective' births is most obviously random, we exclude in the main analysis 'elective' births (resulting from induction of labour and elective Caesarean sections). However, as a sensitivity analysis we report results on the variation of all births and of acute Caesarean sections.



## MATERIAL AND METHODS

### *Data*

The number of births for each date in the period from the 1<sup>st</sup> of January 2000 until the 31<sup>st</sup> of December 2009 at all seven obstetric clinics in the capital region of Denmark were extracted from the Danish Birth registry. The obstetric clinics were Rigshospitalet, Frederiksberg, Glostrup, Gentofte, Herlev, Hvidovre and Hillerød, which cover over 99% of all births in the region, as a dwindling number of births takes place at home in Denmark. The data included information on the type of birth: elective Caesarean sections, births after elective induction of labour, acute Caesarean sections and births after spontaneous onset of labour. The labelling of the type of birth has been done by using information from the National Birth registry on operation codes for elective Caesarean sections (KMCA10B and D) and obstetric codes for induction of labour (KMAC00 Amniotomy prior to birth, KMAC96A Mechanical catheter induction, BKHD2 Unspecific medical induction, BKHD20 Induction with prostaglandin, BKHD21 Induction with oxytocin) . The coding of birth information is based on information from midwives and is generally considered very valid.

### *Statistical methods*

The main concept of these analyses builds on the empirical fact that even for 'non-elective' births there is a non-ignorable variation across the seven days of the week, however for each fixed day of the week the variation across the 52 (53) weeks in a given year may be interpreted as random. We exploit the well-known fact that Poisson distributions are well approximated by normal distributions with the same mean and variance, clearly distinguishable by the Poisson distribution property that the mean equals the variance. In this way the key issue – whether the Poisson distribution is an adequate description – is captured by a one-way analysis of variance comparing the seven days of the week for each of the ten years and each of the seven clinics. The results are illustrated by descriptive graphs and worked examples of possible use in staffing planning. Additional sensitivity analyses are performed including all births and acute Caesareans.

### *Details of ethics approval*

An ethical approval for this study was not required. The data used are available online in an anonymous form.

## RESULTS

There were 211,290 births distributed on seven departments in the capital region of Denmark from the 1<sup>st</sup> of January 2000 until the 31<sup>st</sup> of December 2009. In order to exclude potential elective births, births were subdivided into induced or spontaneous labour and elective and acute Caesareans (Table I). Births where the mode of delivery was an elective Caesarean (n=16,325 (7.73 %)) and births initiated by induction of

1  
2  
3 labour (n=23,956 (11.34%)) were excluded from the data set for main analyses, thus leaving a total of  
4 171,009 (80.94%) spontaneous births and acute Caesareans, to be denoted 'non-elective' below.

5  
6 As mentioned in the introduction a main problem in obstetrics management is the variation over days of  
7 the week. This variation is to a large degree a result of decisions by the obstetricians on how to distribute  
8 elective Caesareans and electively induced labour over the days of the week (6, 12). Preliminary descriptive  
9 analyses of the data clearly indicated that such policies varied considerably over the ten years for each  
10 department and that the patterns were rather different between departments, however overall a mid-  
11 weekly peak in births remained even when 'elective' births were excluded (please see the supplementary  
12 file, Figure III-IX). The staffing required for these 'elective' births is a consequence of management  
13 decisions, and our focus is here on how to capture the primarily random variation in the 'non-elective'  
14 births. Because of the strong heterogeneity in the day-to-day pattern for several of the involved  
15 departments over the ten years under study, we performed a set of 70 one-way analyses of variance  
16 comparing the number of 'non-elective' births at each day of the week for each fixed combination of  
17 department (n=7) and year (n=10). The residual variances from these 70 analyses were compared to the  
18 annual mean number of births for each department. Additional sensitivity analyses were performed  
19 including all births and acute Caesareans. As seen in Figure I, the residual variances are very close to the  
20 means, indicating a Poisson distribution of the variation in number of 'non-elective' births for each day of  
21 the week around the yearly average for that day. We also see that the closeness of residual variance to the  
22 mean improves when we only look at the 'non-elective' births while for the acute Caesareans only there is  
23 a clear trend that the variance is larger than the mean, so-called overdispersion which violates the  
24 assumption of Poisson distribution. In view of these findings we focus on the non-elective births in the  
25 following.

26  
27 To illustrate our findings three selected combinations of department and year, a small, medium and large  
28 clinic, were chosen. For each day of the week a histogram shows the observed distribution of the 52 (53)  
29 numbers of births per day for that year with fitted normal distribution (red) and fitted Poisson distribution  
30 was produced (green) (Figure II). It is seen that there is a nice fit throughout of the Poisson distributions,  
31 and also that they are very close to the normal distributions with the same variance. This means that  
32 calculations of the likely variation in number of 'non-elective' births can be based on the normal  
33 distribution with variance given by the average number of 'non-elective' births per day over the year.

34  
35 For example, if at a particular department in a particular year the mean number of 'non-elective' births is 9,  
36 the residual variance is estimated to be 9 and the standard deviation as the square root of 9, that is, 3.  
37 Assume that the mean number of 'non-elective' births on Tuesdays for that department for that year is  
38 10.5. In 95% of Tuesdays the actual number of 'non-elective births' at that department will be in the  
39 interval between  $10.5 - 3 \times 1.96 = 4.6$  and  $10.5 + 3 \times 1.96 = 17.4$ , while in 80% of Tuesdays there will be  
40  
41  
42  
43  
44  
45  
46  
47  
48  
49  
50  
51  
52  
53  
54  
55  
56  
57  
58  
59  
60

1  
2  
3 between  $10.5 - 3 \times 1.28 = 6.7$  and  $10.5 + 3 \times 1.28 = 14.3$  non-elective births. This model is suitable for  
4 estimating daily number of births and planning of staffing in obstetric clinics and the model is adequate to  
5 be used in smaller as well as larger clinics.  
6  
7

#### 8 9 DISCUSSION

10 Management of staffing in obstetric clinics is a difficult task, due to the relatively unpredictable nature of  
11 labour onset. Nowadays many births are 'elective' births in the sense that elective Caesarean sections or  
12 medically induced labour more or less governs the time of the week where the birth happens. It has been  
13 assumed that the day to day variation on numbers of births fits a Poisson distribution (13, 18), but suitable  
14 data on live births, including mode of delivery, from a larger population has not previously been studied,  
15 thus limiting the means of studying day to day variation (7, 13). Furthermore the impact of elective  
16 obstetric intervention on the distribution has not been considered in any of the previous studies addressing  
17 birth variation (5-14, 19).  
18

19 Interestingly we find that even with the exclusion of births resulting from an obstetric intervention as  
20 elective caesarean or induction of labour, the remaining data still show significant weekly variation with a  
21 mid-weekly peak. As such this variation might not only be ascribed to measurable obstetric interventions,  
22 but also less tangible practices, for instance the time of admittance of a woman in early stages of labour  
23 might depend on staff numbers which vary during the week. Also traditional non-medical methods of  
24 starting labour (hot baths, sexual intercourse, etc.) might be less likely to be tried by mothers in the  
25 weekends (7).  
26

27 However regardless of any obstetric practices or mothers practice, we found that the distribution of the  
28 remaining 'non-elective' births for each day of the week, each year, and each department is still well  
29 approximated by a Poisson distribution, where the mean equals the variance. For the relevant parameter  
30 values, this Poisson distribution is indistinguishable from a normal distribution, where we then may  
31 estimate the variance from the mean. This means that calculations of the likely variation in number of non-  
32 elective births can be based on the normal distribution with variance given by the average number of non-  
33 elective births per day over the year.  
34

35 This provides us with a useful tool for planning of the staffing necessary to handle all births on a given  
36 weekday in an obstetric clinic. Elective Caesarean sections are usually planned to be performed on specific  
37 weekdays with staff dedicated to this task. Births after induction of labour will also in most regards be  
38 planned. Combining the known number of elective births with the calculation of a 95% or 80% confidence  
39 interval of 'non-elective' births on a given week day gives a good possibility to avoid over- or understaffing  
40 and utilize the available human resources to their best. For larger clinics where the mean number of non-  
41 elective births for a given weekday may vary by more than 1-2 births, the relocation of staffing to 'peak'  
42  
43  
44  
45  
46  
47  
48  
49  
50  
51  
52  
53  
54  
55  
56  
57  
58  
59  
60

1  
2  
3 weekdays has the most to offer, but even smaller clinics can benefit from more concrete calculation, for  
4 example on how weekend staffing should be.

5  
6 The fact that the distribution of 'non-elective' births is indistinguishable from normal distribution provides a  
7 simple, but elegant, tool for planning of staffing in obstetric clinics and used wisely may prove a positive  
8 adjustment for work efficiency, cost and environment.  
9  
10

#### 11 12 CONCLUSIONS

13  
14 We may estimate the variance from the mean, as the Poisson distribution for these parameters is  
15 indistinguishable from a normal distribution. This model is suitable for estimating the variation in the daily  
16 number of 'non-elective' births and could be used for planning of staffing in obstetric clinics.  
17  
18

#### 19 20 COMPETING INTEREST

21  
22 All authors have completed the Unified Competing Interest form at  
23 [http://www.icmje.org/coi\\_disclosure.pdf](http://www.icmje.org/coi_disclosure.pdf) (available on request from the corresponding author) and  
24 declare: no support from any organization for the submitted work, no financial relationships with any  
25 organization that might have an interest in the submitted work in the previous three, no other relationships  
26 or activities that could appear to have influenced the submitted work.  
27  
28  
29

#### 30 31 FUNDING

32  
33 This research received no specific grant from any funding agency in the public, commercial or not-for-profit  
34 sectors.  
35  
36

#### 37 38 CONTRIBUTION TO AUTHORSHIP

39  
40 CMG, NK, JT and EL have all been involved in the conception of this study. The statistical analysis has been  
41 carried out mainly by JT under the guidance of NK, EL and CMG. The writing of this article has been done by  
42 CMG, NK, JT and EL. Coordination of the correspondence between authors has been taken care of by CMG.  
43  
44  
45  
46  
47  
48  
49  
50  
51  
52  
53

#### 54 55 REFERENCES

56  
57 1. Sygehusfødsler og fødeafdelingernes størrelse 1982-2005. Nye tal fra Sundhedsstyrelsen  
58 [Hospital births and size at birth departments 1982-2005. New figures from the Danish Health and  
59  
60

- 1  
2  
3 Medicines Auhtority]. Copenhagen. Danish Health and Medicines Authority; 2007. Available from:  
4 [http://www.sst.dk/publ/tidsskrifter/nyetal/pdf/2007/03\\_07.pdf](http://www.sst.dk/publ/tidsskrifter/nyetal/pdf/2007/03_07.pdf). Danish.
- 5 2. Sygehusbehandling og Beredskab. Specialevejledning for gynækologi og obstetrik [Hospital  
6 and Emergency Management. Guidelines for the speciality of gynecology and obstetrics] [database on the  
7 Internet]. Danish Health and Medicines Authority. 2011. Available from:  
8 [http://www.google.dk/url?sa=t&rct=j&q=&esrc=s&frm=1&source=web&cd=1&cad=rja&ved=OCC0QFjAA&url=http%3A%2F%2Fwww.sst.dk%2F~%2Fmedia%2FPlanlaegning%2520og%2520kvalitet%2FSpecialeplanlaegning%2FSpecialevejledninger\\_2010%2FSpecialevejledning\\_%2520gynaekologi\\_obstetrik.ashx&ei=HN5BUe3YLMWXO8vkgNgN&usg=AFQjCNHwTAn\\_VjRByL74GQSAq-mmLD4XYQ&sig2=Dgizs6-smdvyJnCuAnGtZw](http://www.google.dk/url?sa=t&rct=j&q=&esrc=s&frm=1&source=web&cd=1&cad=rja&ved=OCC0QFjAA&url=http%3A%2F%2Fwww.sst.dk%2F~%2Fmedia%2FPlanlaegning%2520og%2520kvalitet%2FSpecialeplanlaegning%2FSpecialevejledninger_2010%2FSpecialevejledning_%2520gynaekologi_obstetrik.ashx&ei=HN5BUe3YLMWXO8vkgNgN&usg=AFQjCNHwTAn_VjRByL74GQSAq-mmLD4XYQ&sig2=Dgizs6-smdvyJnCuAnGtZw).  
9 Danish.
- 10  
11 3. Tal og analyse: Fødselsstatistikken 2011 [Numbers and analysis: Birthstatistics 2011].  
12 Copenhagen. Danish Health and Medicines Authority; 2012. Available from:  
13 <http://www.sst.dk/publ/2012/03mar/Foedselsstatistik2011.pdf>. Danish.
- 14 4. Fødsler 1973- [Births 1973-] [database on the Internet]. Danish Health and Medicines  
15 Authority. Available from:  
16 <http://www.ssi.dk/Sundhedsdataogit/Dataformidling/Sundhedsdata/Fodsler/Fodsler%201973.aspx>.  
17 Danish.
- 18 5. Cohen A. Seasonal daily effect on the number of births in Israel. *J R Stat Soc Ser C Appl Stat.*  
19 1983;32(3):228-35.
- 20 6. Curtin SC, Park MM. Trends in the attendant, place, and timing of births, and in the use of  
21 obstetric interventions: United States, 1989-97. *Natl Vital Stat Rep.* 1999;47(27):1-12.
- 22 7. MacFarlane A. Variations in number of births and perinatal mortality by day of week in  
23 England and Wales. *Br Med J.* 1978;2(6153):1670-3.
- 24 8. Martins JM. Never on Sundays. *Med J Aust.* 1972;1(10):487-8.
- 25 9. Menaker W, Menaker A. Lunar periodicity in human reproduction: a likely unit of biological  
26 time. *Am J Obstet Gynecol.* 1959;77(4):905-14.
- 27 10. Odegard O. Season of birth in the population of Norway, with particular reference to the  
28 September birth maximum. *Br J Psychiatry.* 1977;131:339-44.
- 29 11. Borst LB, Osley M. Letter: Holiday effects upon natality. *Am J Obstet Gynecol.*  
30 1975;122(7):902-3.
- 31 12. Rindfuss RR, Ladinsky JL, Coppock E, Marshall VW, Macpherson AS. Convenience and the  
32 occurrence of births: induction of labor in the United States and Canada. *Int J Health Serv.* 1979;9(3):439-  
33 60.
- 34 13. Hawe E, MacFarlane A. Daily and seasonal variation in live births, stillbirths and infant  
35 mortality in England and Wales, 1979-96. *Health Statistics Quarterly.* 2001;(9):5-15.
- 36 14. Osley M, Summerville D, Borst LB. Natality and the moon. *Am J Obstet Gynecol.*  
37 1973;117(3):413-5.
- 38 15. Huang XM. A planning model for requirement of emergency beds. *IMA J Math Appl Med Biol.*  
39 1995;12(3-4):345-53.
- 40 16. Kao EP, Tung GG. Bed allocation in a public health care delivery system. *Management*  
41 *Science.* 1981;27(5):507-20.
- 42 17. Pike MC, Proctor DM, Wyllie JM. Analysis of Admissions to a Casualty Ward. *Br J Prev Soc*  
43 *Med.* 1963;17:172-6.
- 44 18. Kirkwood BR. The Poisson Distribution. *Essentials of Medical Statistics: Blackwell Science;*  
45 1988. p. 125-7.
- 46 19. Fallenstein F, Haener W, Huch A, Huch R. The influence of the moon on deliveries. *Am J*  
47 *Obstet Gynecol.* 1984;148(1):119-20.
- 48  
49  
50  
51  
52  
53  
54  
55  
56  
57  
58  
59  
60

**Table 1** Type of births in each obstetric clinic in the Capital region of Denmark during 2000-2009, with number and percentages of spontaneous births, acute Caesarean sections after spontaneous onset of labour, births after induction of labour and elective Caesarean sections.

| Obstetric clinic  | Births per clinic | Non-elective births (81 %) |    |                 |    | Elective births (19 %) |    |                    |    |
|-------------------|-------------------|----------------------------|----|-----------------|----|------------------------|----|--------------------|----|
|                   |                   | Spontaneous birth          | %  | Acute Caesarean | %  | Induced birth          | %  | Elective Caesarean | %  |
| Rigshospitalet    | 35.657            | 19.144                     | 54 | 5.740           | 16 | 6.345                  | 18 | 4.428              | 12 |
| Hvidovre          | 53.300            | 39.335                     | 74 | 7.264           | 14 | 2.375                  | 4  | 4.326              | 8  |
| Frederiksberg     | 17.751            | 13.784                     | 78 | 1.794           | 10 | 1.266                  | 7  | 907                | 5  |
| Gentofte          | 21.988            | 14.216                     | 65 | 2.863           | 13 | 3.349                  | 15 | 1.560              | 7  |
| Glostrup          | 22.737            | 15.972                     | 70 | 2.883           | 13 | 2.808                  | 12 | 1.074              | 5  |
| Herlev            | 23.967            | 17.352                     | 72 | 2.800           | 12 | 2.680                  | 11 | 1.135              | 5  |
| Hillerød          | 35.890            | 23.209                     | 65 | 4.653           | 13 | 5.133                  | 14 | 2.895              | 8  |
| All seven clinics | 211.290           | 143.012                    | 68 | 27.997          | 13 | 23.956                 | 11 | 16.325             | 8  |

1  
2  
3  
4  
5  
6  
7  
8  
9  
10  
11  
12  
13  
14  
15  
16  
17  
18  
19  
20  
21  
22  
23  
24  
25  
26  
27  
28  
29  
30  
31  
32  
33  
34  
35  
36  
37  
38  
39  
40  
41  
42  
43  
44  
45  
46  
47  
48  
49  
50  
51  
52  
53  
54  
55  
56  
57  
58  
59  
60

**Figure I** Residual variance compared to the mean number of births per day for a) 'non-elective' births, b) all births and c) acute Caesarean sections.

a)



b)

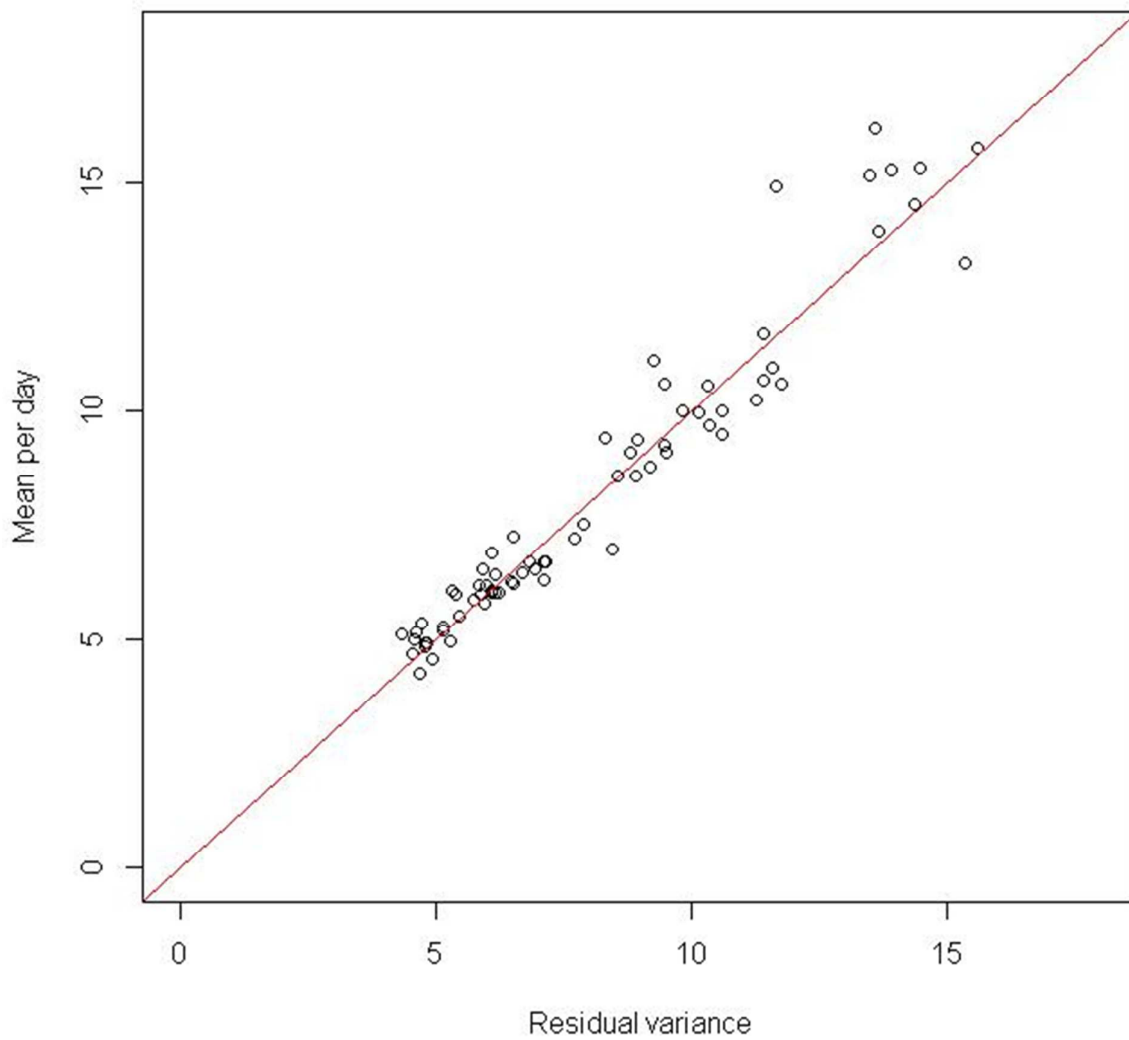

1  
2  
3  
4  
5  
6  
7  
8  
9  
10  
11  
12  
13  
14  
15  
16  
17  
18  
19  
20  
21  
22  
23  
24  
25  
26  
27  
28  
29  
30  
31  
32  
33  
34  
35  
36  
37  
38  
39  
40  
41  
42  
43  
44  
45  
46  
47  
48  
49  
50  
51  
52  
53  
54  
55  
56  
57  
58  
59  
60



1  
2  
3  
4  
5  
6  
7  
8  
9  
10  
11  
12  
13  
14  
15  
16  
17  
18  
19  
20  
21  
22  
23  
24  
25  
26  
27  
28  
29  
30  
31  
32  
33  
34  
35  
36  
37  
38  
39  
40  
41  
42  
43  
44  
45  
46  
47  
48  
49  
50  
51  
52  
53  
54  
55  
56  
57  
58  
59  
60

c)



**Figure II** Exemplification of a small (Gentofte), medium (Herlev) and large (Hvidovre Hospital, abbreviated HH) obstetric clinic with number of births at the x axis and density at the y axis with curves indicating the Poisson distribution (Red) and the normal distribution (Green).

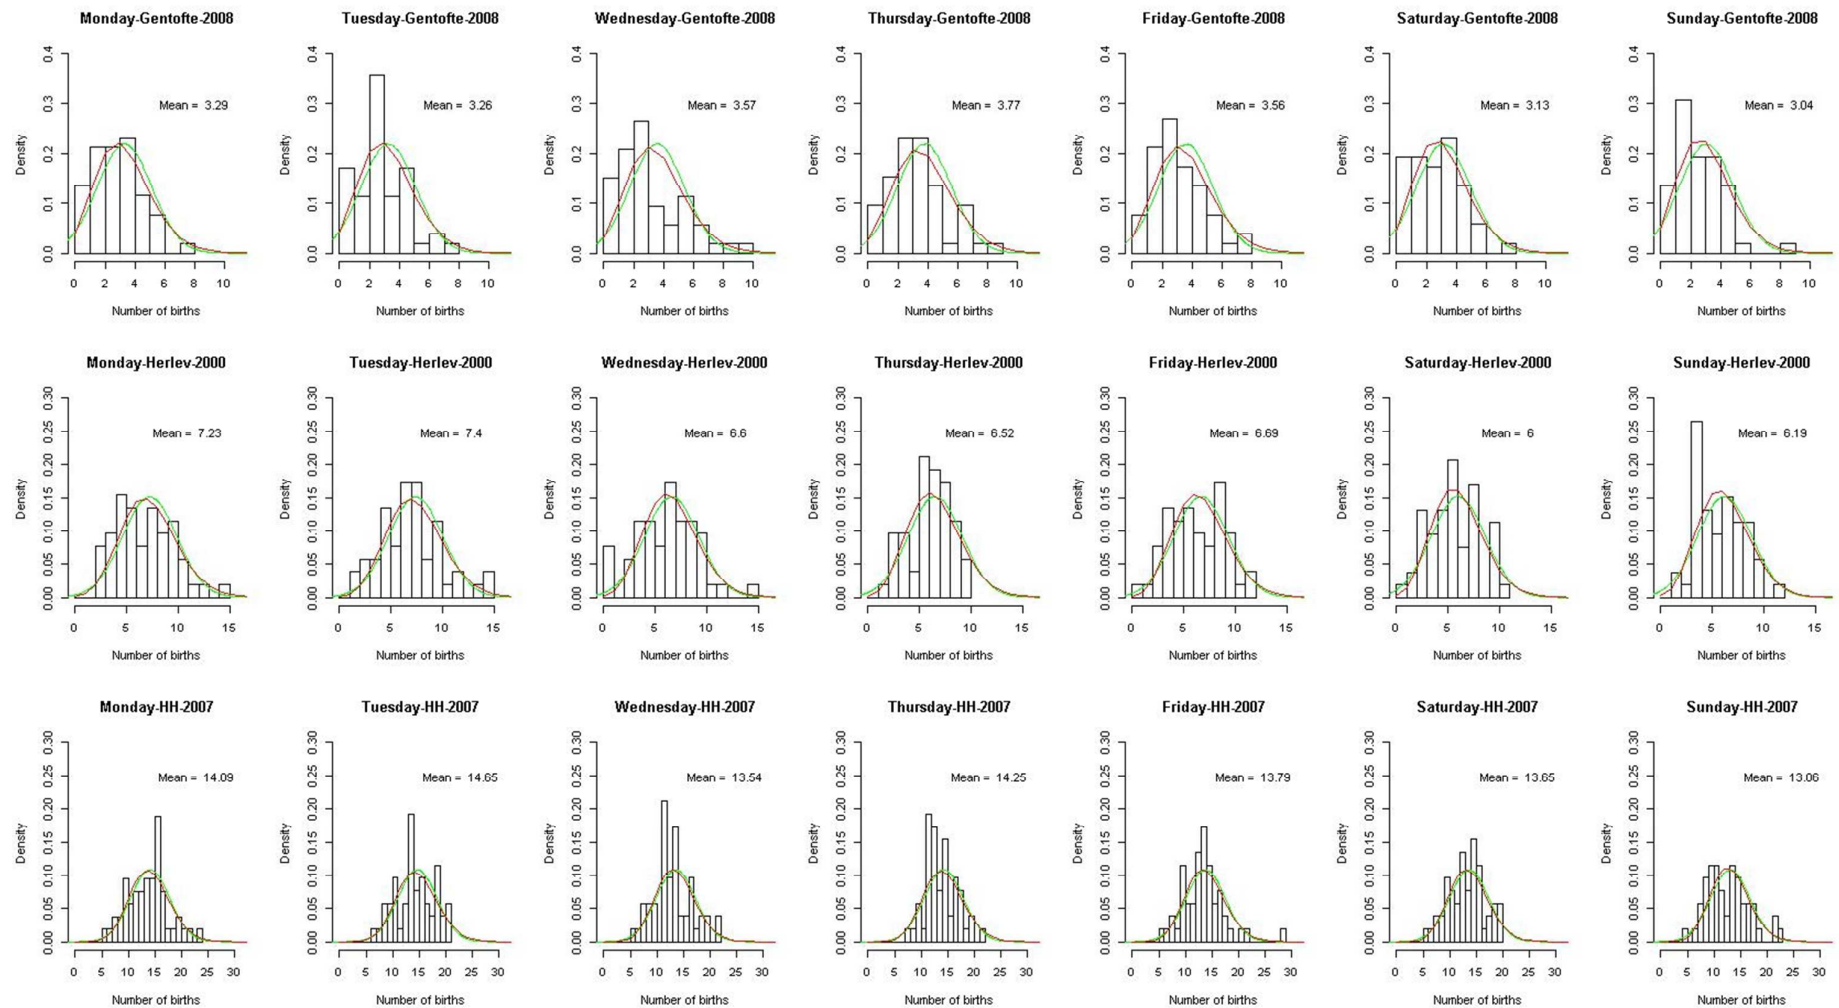

**SUPPLEMENTARY FILE**

Preliminary descriptive analyses of the data clearly indicated that policies concerning planning of elective Caesarean sections and electively induced labour varied considerably over the ten years for each department and that the patterns were rather different between departments, however overall a mid-weekly peak in births remained even when 'elective' births were excluded. The following figures (Figure III-IX) illustrate this finding.

For peer review only

**Figure III** Number of births on each day of the week for each year in the obstetric clinic of Frederiksberg a) for all births and b) for 'non-elective' births

a)

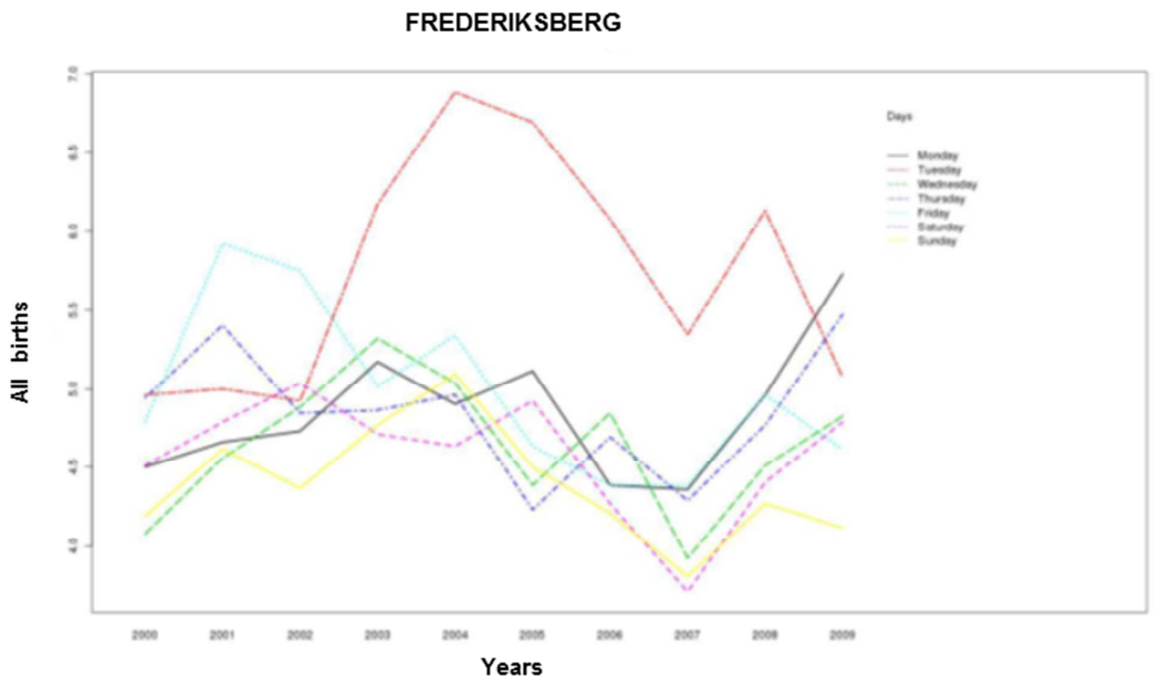

b)

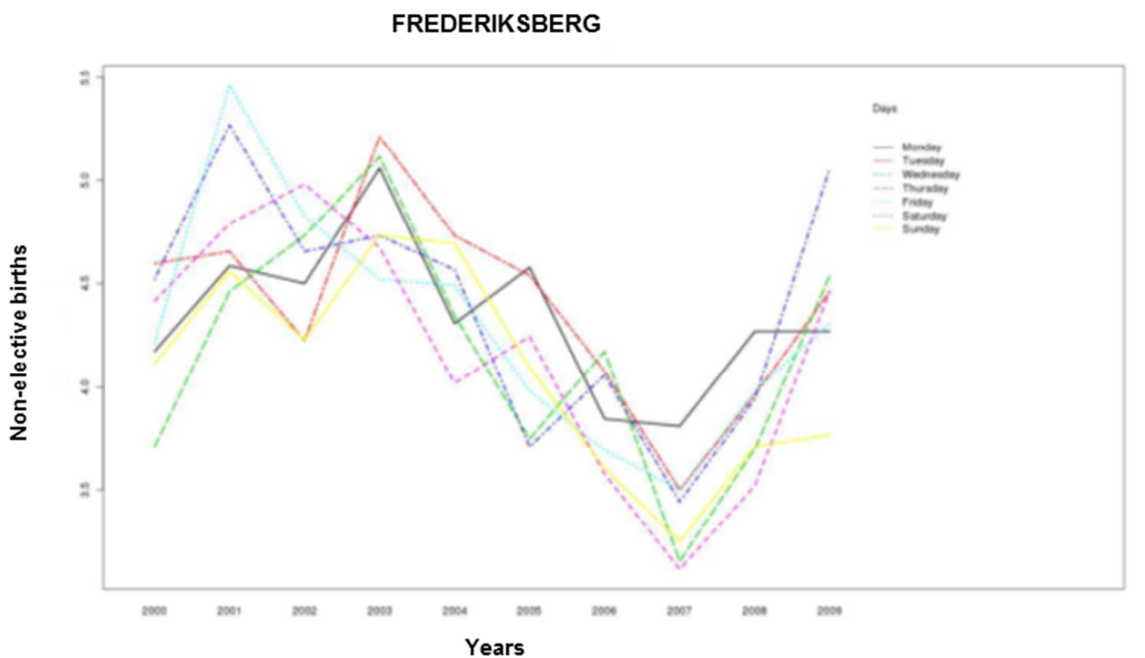

Figure IV Number of births on each day of the week for each year in the obstetric clinic of Gentofte a) for all births and b) for 'non-elective' births

a)

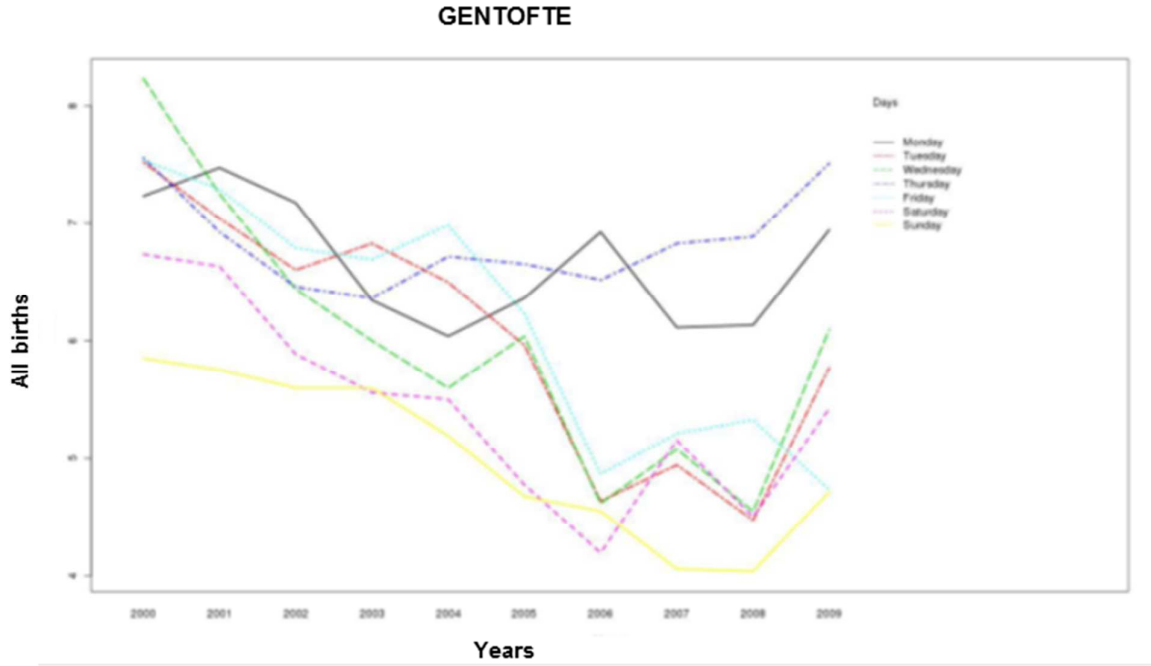

b)

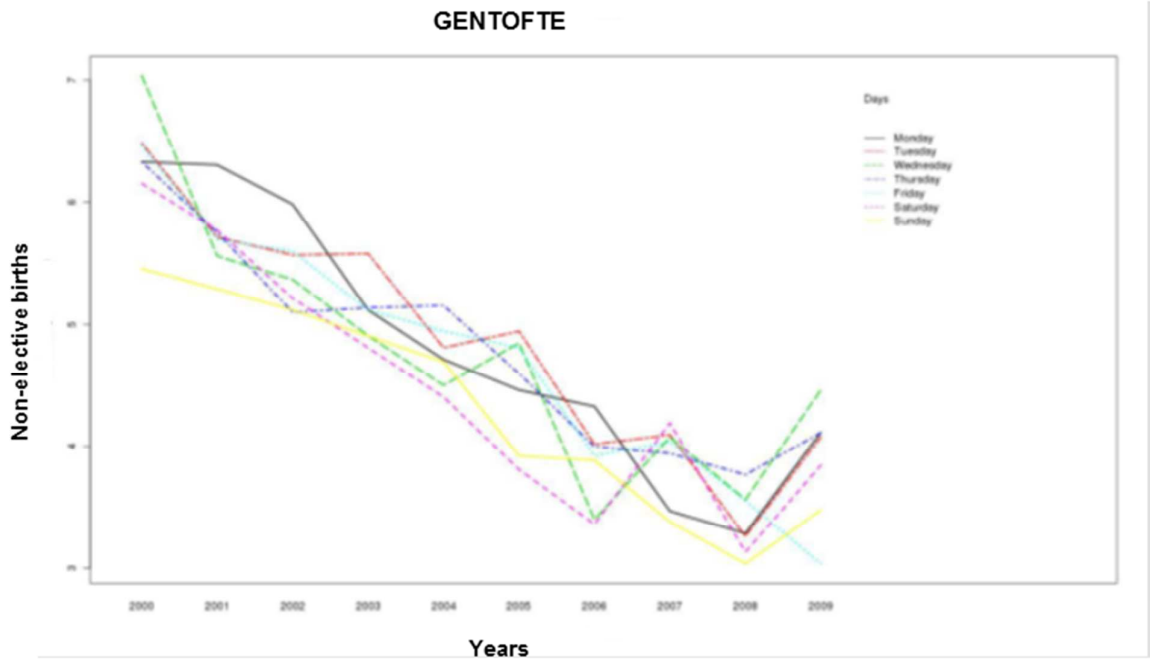

**Figure V** Number of births on each day of the week for each year in the obstetric clinic of Glostrup a) for all births and b) for 'non-elective' births

a)

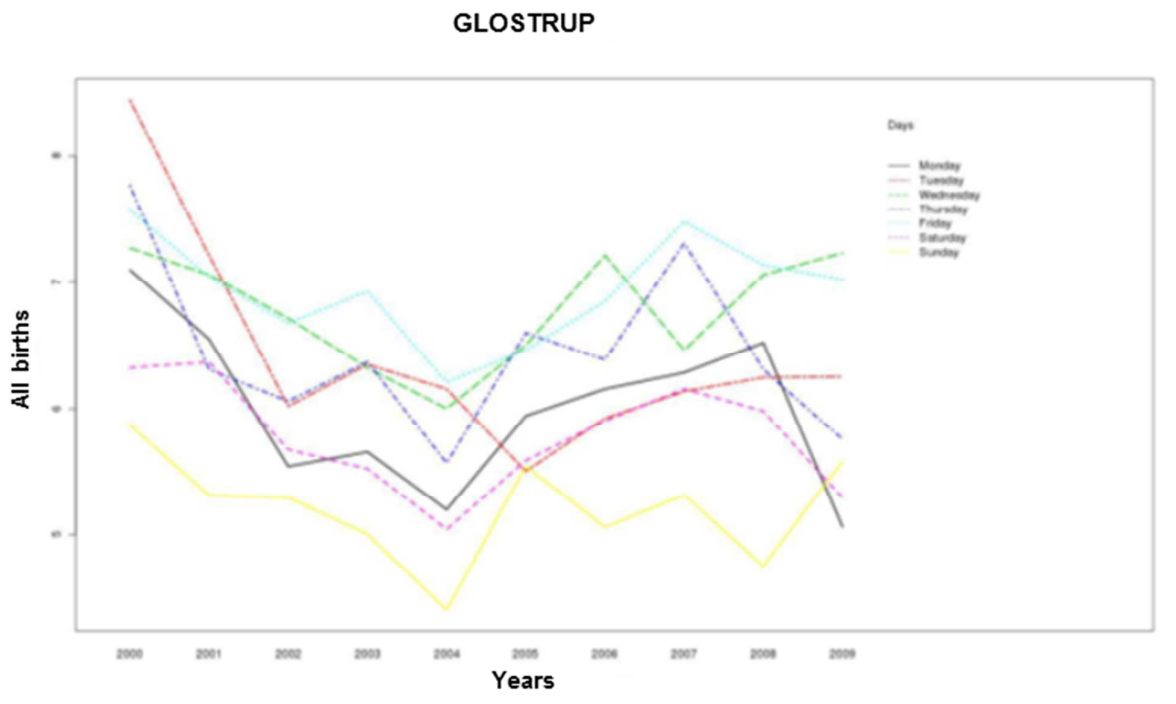

b)

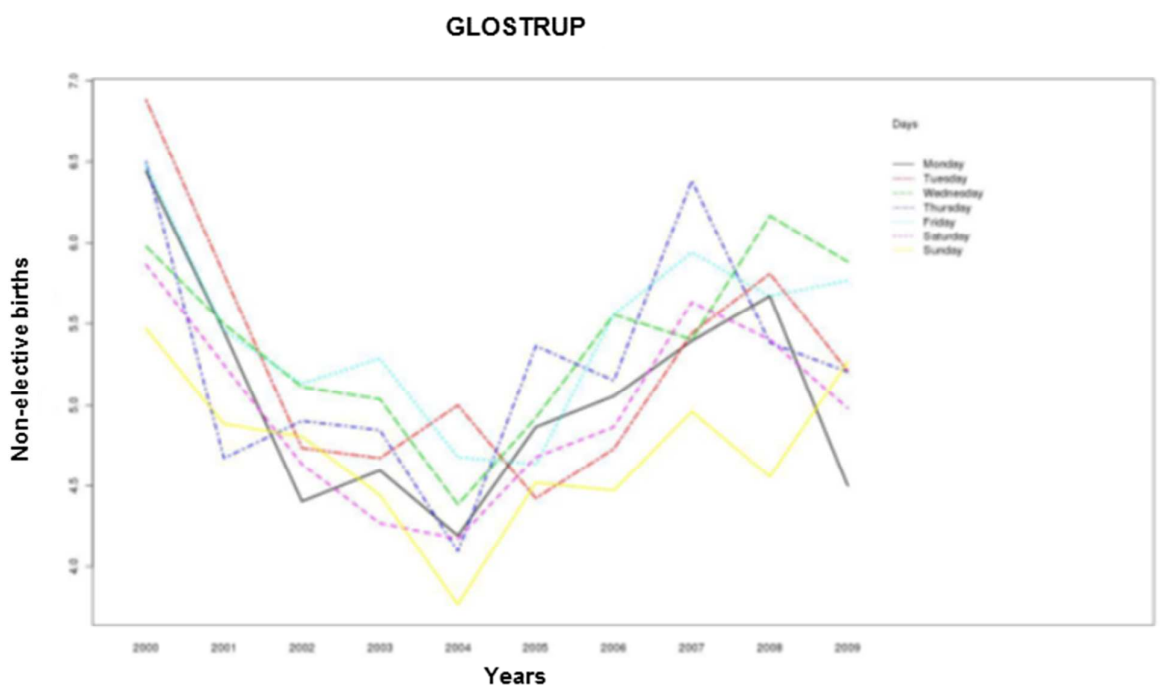

Figure VI Number of births on each day of the week for each year in the obstetric clinic of Herlev a) for all births and b) for 'non-elective' births

a)

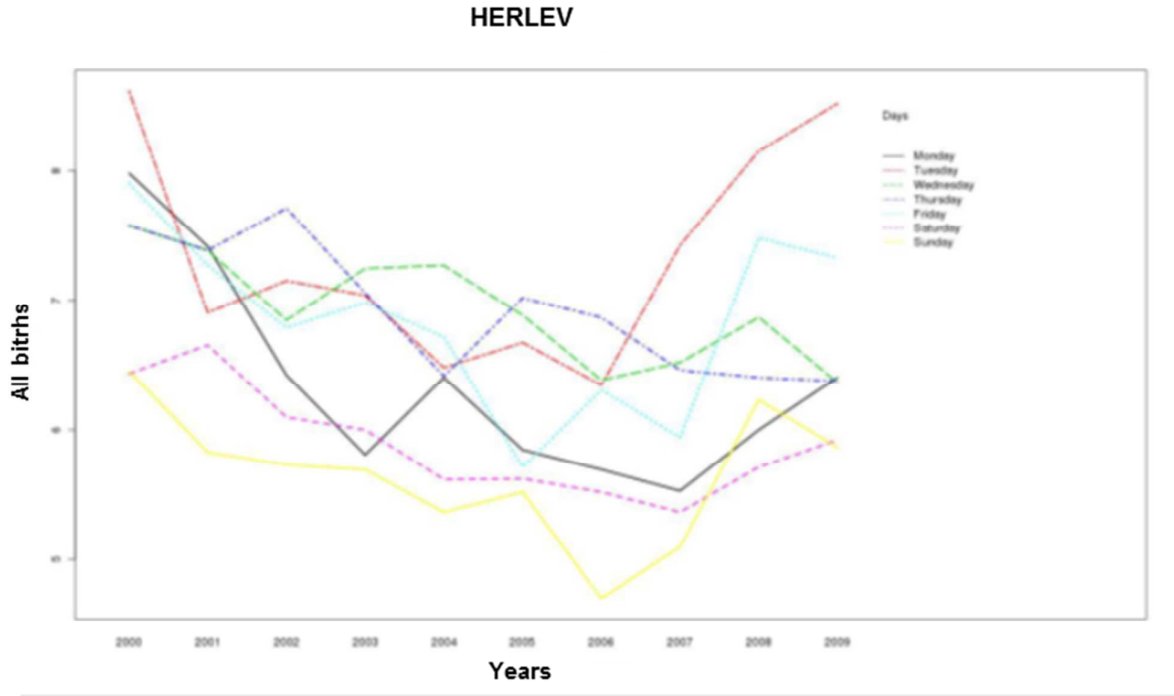

b)

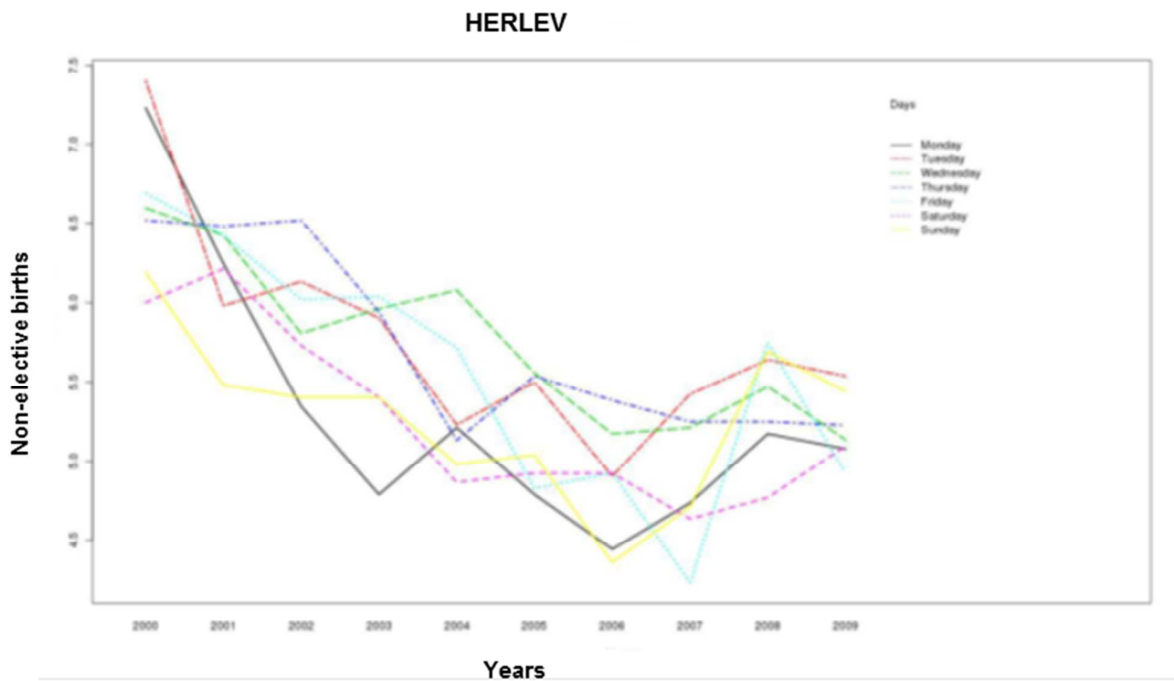

Figure VII Number of births on each day of the week for each year in the obstetric clinic of Hillerød a) for all births and b) for 'non-elective' births

a)

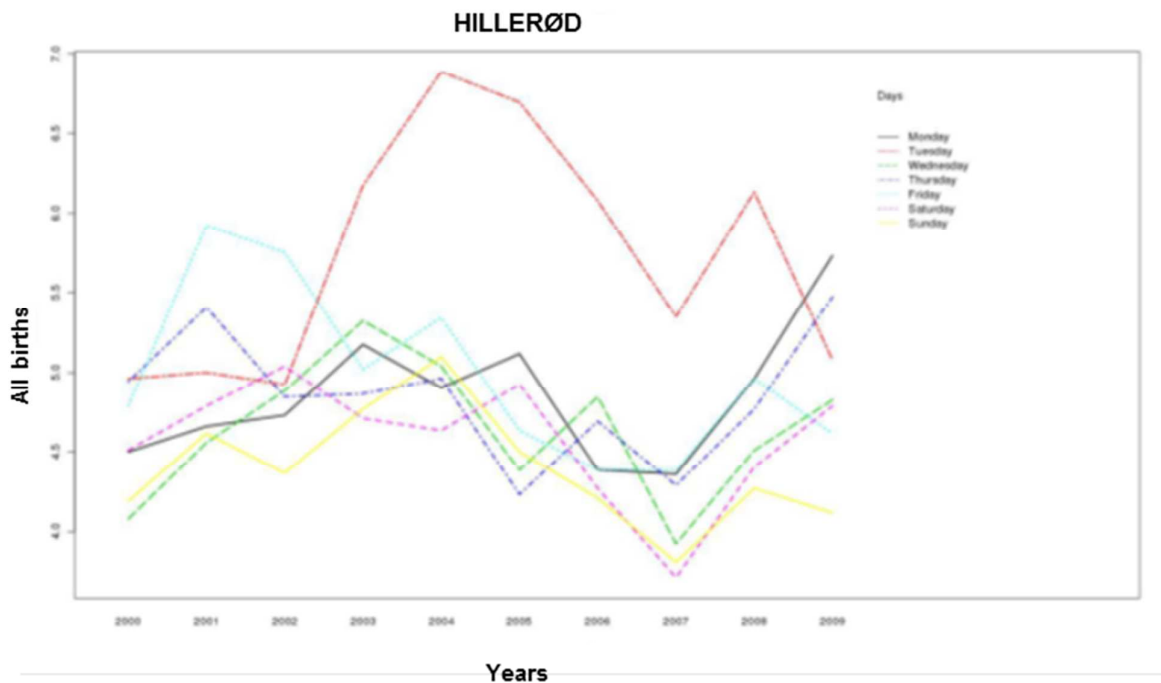

b)

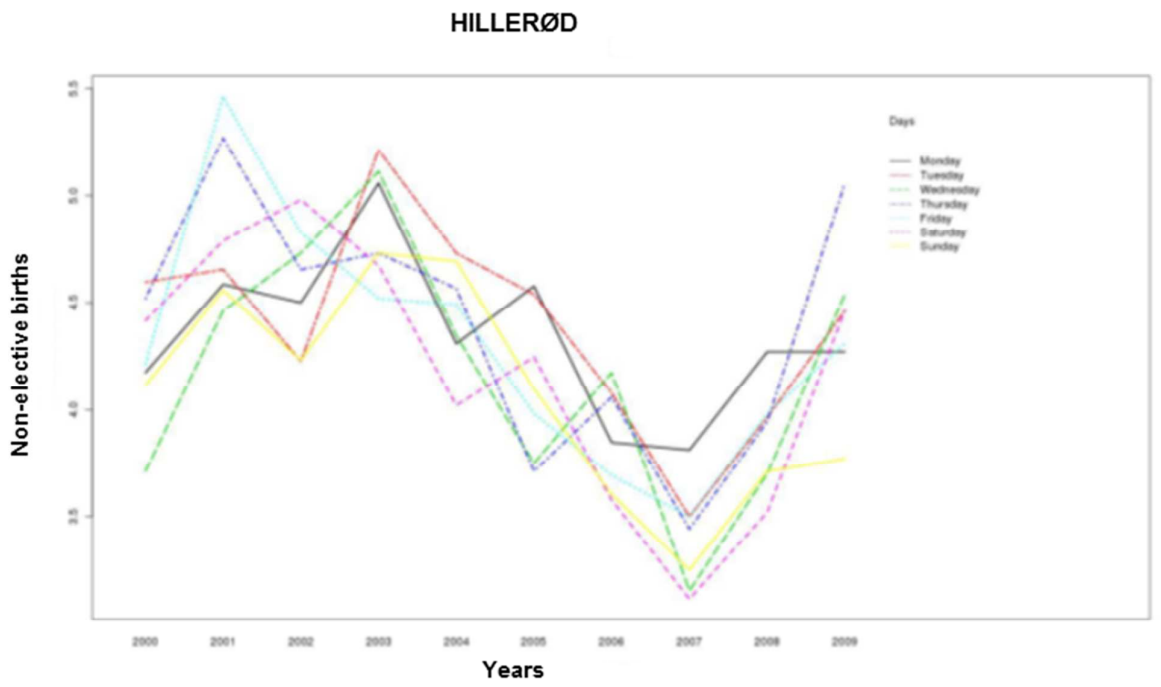



1  
2  
3  
4  
5  
6  
7  
8  
9  
10  
11  
12  
13  
14  
15  
16  
17  
18  
19  
20  
21  
22  
23  
24  
25  
26  
27  
28  
29  
30  
31  
32  
33  
34  
35  
36  
37  
38  
39  
40  
41  
42  
43  
44  
45  
46  
47  
48  
49  
50  
51  
52  
53  
54  
55  
56  
57  
58  
59  
60

**Figure VIII** Number of births on each day of the week for each year in the obstetric clinic of Hvidovre a) for all births and b) for 'non-elective' births

a)

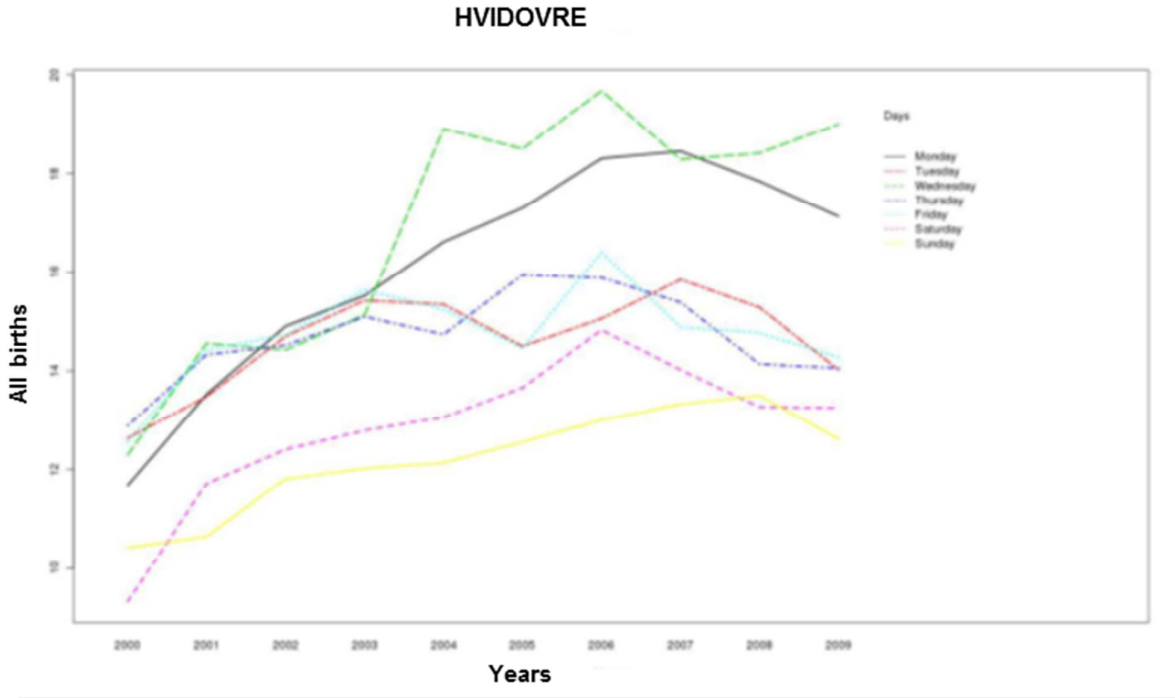

b)

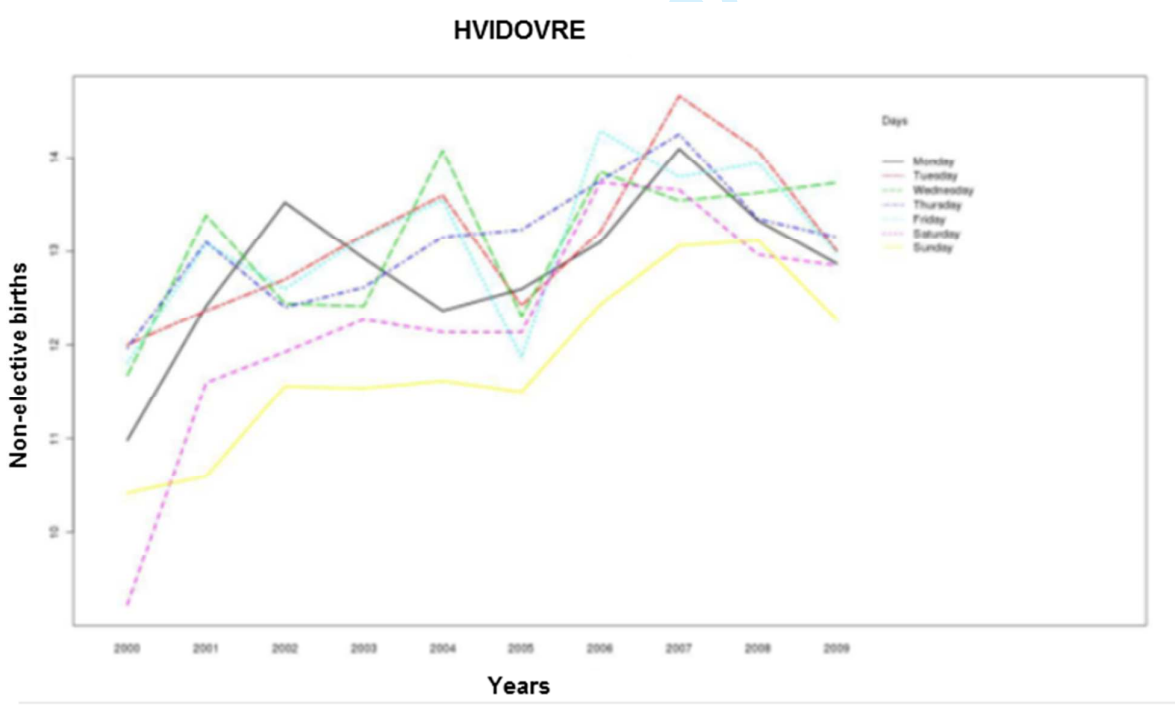

**Figure IX** Number of births on each day of the week for each year in the obstetric clinic of Rigshospitalet a) for all births and b) for 'non-elective' births

a)

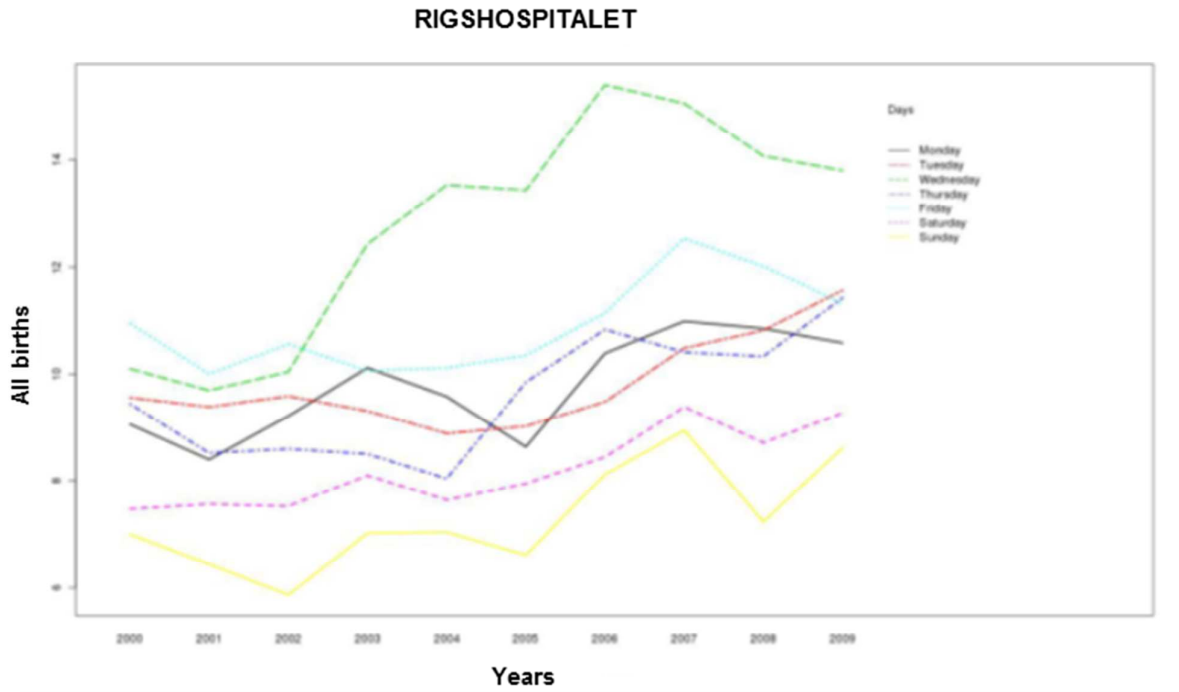

b)

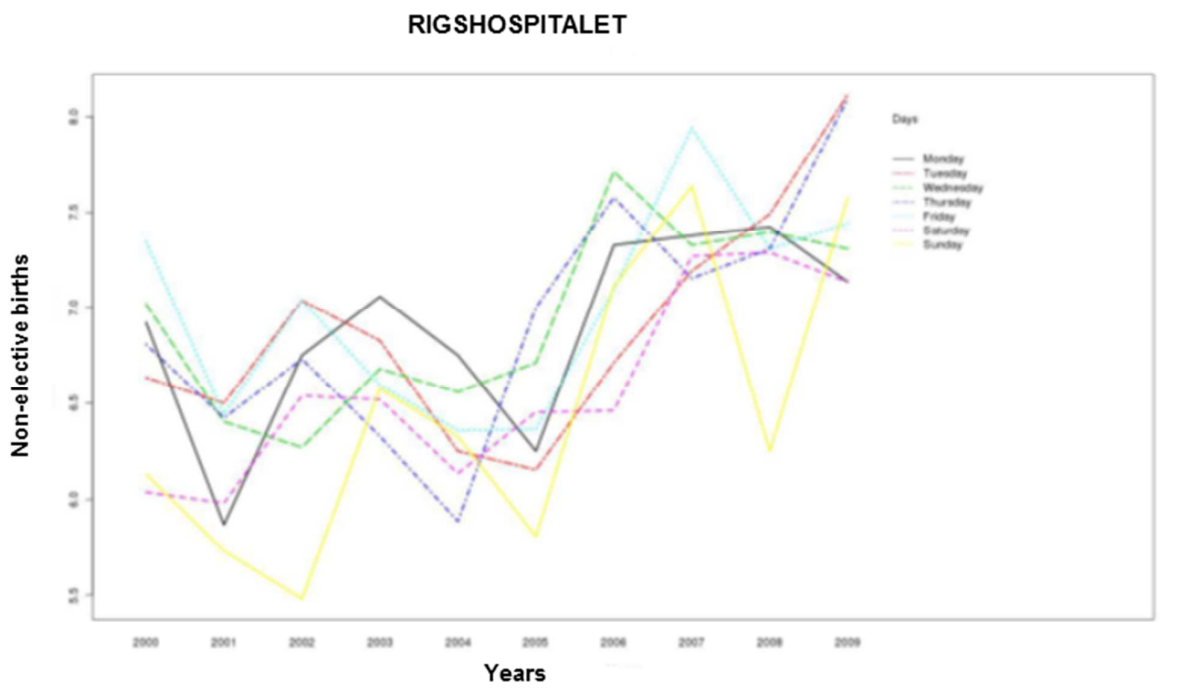

## Licence to BMJ Publishing Group Limited (“BMJ Group”) for Publication

To be agreed to by the corresponding author or guarantor on behalf of all authors, (“Corresponding Author”); all authors collectively are referred to as the “Contributors”.

In consideration of the BMJ Group, (“the Publisher”) considering to publish the article contained within the original manuscript which includes without limitation any diagrams, photographs, other illustrative material, video, film or any other material howsoever submitted by the Contributor(s) at any time and related to the Contribution, (“the Contribution”), certain rights are required to be granted by each different category of author(s), which are as follows:

1. For employees of the **UK Crown acting in the course of their employment**, a non exclusive Licence, as set out below. All provisions of this document apply. The non exclusivity relates to the original submitted manuscript video, films, images, photographs, diagrams and/or illustrative material only).
2. For employees of the **US Federal Government acting in the course of their employment**, no copyright exists and the Contribution is in the public domain so no licence is required to be granted. The Author Warranties below apply (excluding 1.iii).
3. For all other authors, an exclusive Licence, as set out below. All provisions of this document apply.

**NB** where a Contribution is a multi authored work, each author’s element of the Contribution will be dealt with in accordance with 1, 2 or 3 above, as applicable.

### The licence

The Licence granted in accordance with 1 or 3 above is:

A worldwide licence to the Publisher and its licensees in perpetuity (subject to the Reversion of Rights set out below), in all forms, formats and media (whether known now or created in the future), to i) publish, reproduce, distribute, display and store the Contribution, ii) translate the Contribution into other languages, create

adaptations, reprints, include within collections and create summaries, extracts and/or, abstracts of the Contribution and convert or allow conversion into any format including without limitation audio, iii) create any other derivative work(s) based in whole or part on the Contribution, iv) to exploit all subsidiary rights that currently exist or as may exist in the future in the Contribution, v) the inclusion of electronic links from the Contribution to third party material where-ever it may be located; and, vi) licence any third party to do any or all of the above.

If you and/or any co-author’s employer own the copyright to the Contribution, you must obtain in writing, the relevant employers’ consent to grant the licence and agree to all obligations herein. The author(s) hereby agree that, in the event that the BMJ Group sell the whole or part of its journal business to any third party, the benefit and the burden of the Licence contained herein shall be assigned to that third party.

### Additional rights and obligations

The author(s) (and their employers as applicable), hereby authorise the Publisher to take such steps as they consider necessary at their own expense in the copyright owner’s name and on their behalf, if they believe that a third party is infringing or is likely to infringe copyright or the rights granted to the Publisher herein in the Contribution without further recourse to the copyright owner(s).

For **Unlocked** articles (as defined below), the Publisher expressly agree to place the published Contribution for display on PubMed Central (including their international mirror sites) promptly after allocation of an issue number and thereafter publication, without extra charge for this deposit to the authors or their employers (provided PubMed Central does not charge the Publisher), which will include any Publisher supplied amendments or retractions.

“**Unlocked**” means where the author or their employer or other institution has agreed with the Publisher that this Contribution should be considered an Open Access contribution and has paid the Publisher the standard rate in force.

1  
2  
3  
4  
5  
6  
7  
8  
9  
10  
11  
12  
13  
14  
15  
16  
17  
18  
19  
20  
21  
22  
23  
24  
25  
26  
27  
28  
29  
30  
31  
32  
33  
34  
35  
36  
37  
38  
39  
40  
41  
42  
43  
44  
45  
46  
47  
48  
49  
50  
51  
52  
53  
54  
55  
56  
57  
58  
59  
60

“**Locked**” articles are all other articles including Research Funded articles.

“**Research Funded**” articles are Locked Articles but which have been funded wholly or substantially by a funding organisation listed on our manuscript submission website under “Recognised Funders.”

The author(s) acknowledge and accept that BMJ Group may make additional changes to the Contribution as considered necessary in accordance with standard editorial processes whether before or after publication. The Corresponding Author will usually see proofs for their Contribution and every effort will be made to consult with the Corresponding Author if substantial alterations are made. The BMJ Group may also retract or publish a correction or other notice when it considers this appropriate for legal or editorial reasons and this shall be at its absolute discretion which shall be exercised reasonably.

### Reversion of rights

If the Contribution is not published in the print or electronic versions of the Journal or any other Publisher’s products within 12 months of final acceptance by the BMJ Group, (or as otherwise agreed in writing), any Licence granted herein shall automatically terminate and all rights shall revert to the copyright owner. The Publisher may keep a copy of the Contribution as a record (including via any contractor).

### Rights granted to owners of the contribution

Ownership of copyright remains with the author(s) or their employers if they are acting in the course of their employment. All rights not expressly granted are, subject to the Licence terms, reserved by the Publisher. In return for the grant of the Licence herein, the copyright owner(s) shall have the following rights for **non-Commercial Use (unless otherwise stated)** of the Contribution:

1. The right to reproduce a reasonable number (no more than 100) print copies of the final Contribution, by copying or downloading from the BMJ Group website, for personal use and to send copies to colleagues in print or electronic form

provided no fee is charged and this is not done on a systematic basis (which includes via mass e-mailings).

2. The right to include the Contribution in a compilation for classroom use (course packs) to be distributed free of charge (other than for direct photocopying cost) to students at the Contributor(s)’s institution or to be stored in digital format in data rooms for access by students as part of their course work and for in house training programmes of the Contributor(s)’s employer or at seminars or conferences subject to a limit of 100 copies per conference or seminar.
3. The right to i) to post the accepted manuscript (but not the final published version of the Contribution), and the abstract of the final published Contribution on the Contributor(s)’s own and/or his/her institution’s website, 6 months after the print publication date or if not published in print, from being published online, ii) where the article is “Unlocked” for copyright owners to publish the final published Contribution and abstract, as published by the Publisher, in any media from the date of publication for non Commercial Use; and iii) for Research Funded Articles only, the right for the Contributor (s)’s to place the accepted manuscript on PubMed Central (including their international mirror sites) after an embargo period of 12 months from the date of Publication unless otherwise stated on our manuscript submission website under “Recognised Funders”.

The following statements must accompany the articles posted on the Contributor(s)’s and/or his/her institution’s website:

#### Locked and research funded articles acknowledgement

This article has been accepted for publication in [**Contributor, please insert journal name**]. The definitive copyedited, typeset version [**Contributor please insert complete citation information when**

*available*] is available online at: [www. \[Contributor please insert as applicable\].com](http://www.[Contributor please insert as applicable].com)

#### Unlocked article acknowledgement

This article has been accepted for publication in [*Contributor please insert full citation*] following peer review and can also be viewed on the journal's website at [www. \[Contributor please insert as applicable\].com](http://www.[Contributor please insert as applicable].com)

In addition, for Unlocked articles copyright owners (and the Publisher) may allow third parties to use the Contribution in accordance with the Creative Commons Attribution Non Commercial 2.0 licence – see

<http://creativecommons.org/licenses/by-nc/2.0/> and <http://creativecommons.org/licenses/by-nc/2.0/legalcode>

subject to ensuring that the Publisher and Journal are referenced (including a full citation), all third party rights within all images, diagrams, photographs, other illustrative material or films not owned by the authors or BMJ Group are cleared independently and appropriately and all Publisher's trademarks are removed from any derivative works and ensuring any translations, for which a prior translation agreement with BMJ Group has not been established, must prominently display the statement:

"This is an unofficial translation of an article that appeared in a BMJ Group publication. BMJ Group has not endorsed this translation."

4. The right to publish with the necessary acknowledgement of the Publisher and the Journal, all or part of the material from the published Contribution in a book essay, position paper, or other non peer reviewed publication authored or edited by the Contributor(s)'s (which may be a Commercial Use). This does not apply to multiple Contributions in the same journal, for which permission from the Publisher must be sought.
5. The right to use selected figures and tables (of which the author or his employer owns or has licensed) and selected text (up to 300 words) from the Contribution for incorporation within another work published in print or digital format by a third party, so long as full credit is given to the Publisher and use of the parts of the

Contribution is non Commercial Use.

6. The right to receive a royalty for up to 5 years from publication of 10% of any net receipts less sales commission on single orders in excess of £2000 received by the Publisher for any single Contribution reprint or translation sales to a single third party, subject however to any fee being determined (if charged) at the absolute discretion of the Publisher as may be altered from time to time. If the Publisher receives such an order for reprint sales of the Contribution, they will contact the Corresponding Author at the address given on the published Contribution to find out to whom payment should be made. Corresponding Authors have the responsibility to ensure that all authors have agreed what should be done with any such royalty payment.

For permission to use materials that are beyond uses permitted here, visit

<http://group.bmj.com/group/rights-licensing/permissions>.

"Commercial Use" includes:

- copying or downloading of documents, or linking to such postings, for further redistribution, sale or licensing, for a fee;
- copying, downloading or posting by a site or service that incorporates advertising with such content;
- the inclusion or incorporation of document content in other works or services (other than for legally permitted quotations with an appropriate citation) that is then available for sale or licensing, for a fee.
- use of documents or document content (other than for legally permitted quotations with appropriate citation) by organisations for any promotional or advertising purposes whether direct or indirect, whether for a fee or otherwise. Distribution by or on behalf of pharmaceutical organisations is considered in all cases as Commercial Use;
- use for the purposes of monetary reward by means of sale, resale, license, loan, hire transfer or other form of commercial exploitation.

### Author warranties

The author(s) warrant that: i) they are the sole author(s) of the Contribution which is an original work; ii) the whole or a substantial part of the Contribution has not previously been published; iii) they or their employers are the copyright owners of the Contribution; iv) to the best of their knowledge that the Contribution does not contain anything which is libellous, illegal or infringes any third party's copyright or other rights; v) that they have obtained all necessary written consents for any patient information which is supplied with the Contribution; and vi) that they have declared or will accurately declare all competing interests to the Publisher.

### Law and jurisdiction

This Agreement shall be governed by and construed in accordance with the laws of England without regard to the principles of conflicts of law. The parties hereto submit to the exclusive jurisdiction of the English courts.

### The following statement must be included in your manuscript (other than for US Federal Government Employees acting in the course of their employment):

"I [*insert full name*] The Corresponding Author of this article contained within the original manuscript which includes any diagrams & photographs and any related or stand alone film submitted (the Contribution") has the right to grant on behalf of all authors and does grant on behalf of all authors, a licence to the BMJ Publishing Group Ltd and its licensees, to permit this Contribution (if accepted) to be published in any BMJ Group products and to exploit all subsidiary rights, as set out in our licence set out at:

[http://group.bmj.com/products/journals/instructions-for-authors/wholly\\_owned\\_licence.pdf](http://group.bmj.com/products/journals/instructions-for-authors/wholly_owned_licence.pdf)

### IF YOU ARE A NATIONAL INSTITUTE OF HEALTH ("NIH") EMPLOYEE, CONTRACTOR OR TRAINEE

**ADD:** I am a National Institute of Health ("NIH") employee, contractor or trainee, and the following cover sheet will be accepted by the BMJ Group and NIH and incorporated into the above Licence

<http://group.bmj.com/products/journals/instructions-for-authors/nihcoversheet.pdf> .

### The following statement must be included in your manuscript for US Federal Government employees acting in the course of their employment:

"I [*insert full name*] The Corresponding Author has the right on behalf of all Contributors to seek publication by the BMJ Group of all content within the submitted Contribution or as later submitted (which includes without limitation any diagrams, photographs, other illustrative material, video, film or any other material howsoever submitted by any of the Contributors at any time and related to this article) and to grant the warranties all as fully set out here:

[http://group.bmj.com/products/journals/instructions-for-authors/wholly\\_owned\\_licence.pdf](http://group.bmj.com/products/journals/instructions-for-authors/wholly_owned_licence.pdf)

Please tick **one or more** boxes as appropriate:

- I am the sole author of the Contribution.
- I am one author signing on behalf of all co-authors of the Contribution.
- The Contribution has been made in the course of my employment and I am signing as authorised by my employer.
- I am a US Federal Government employee acting in the course of my employment.
- I am not a US Federal Government employee, but some or all of my co-authors are.
- I am an employee of the UK Crown acting in the course of my employment.\*
- I am not an employee of the UK Crown acting in the course of my employment but some/all of my co-authors are.\*

\*Such authors should consult the attached guidance and if necessary return any completed form; see

<http://www.nationalarchives.gov.uk/documents/information-management/articles-ministers-civil-servants-annexa.pdf>

1  
2  
3 **A MODEL FOR THE DISTRIBUTION OF DAILY NUMBER OF BIRTHS IN OBSTETRIC CLINICS BASED ON A DESCRIPTIVE**  
4 **RETROSPECTIVE STUDY**  
5

6 Christiane M. B. Gam<sup>1</sup>, Julien Tanniou<sup>2</sup>, Niels Keiding<sup>2</sup> and Ellen L. Løkkegaard<sup>1</sup>  
7  
8  
9  
10  
11  
12  
13  
14  
15  
16  
17  
18  
19  
20  
21  
22  
23

24 **Contact information**

25 Christiane Marie Bourgin Gam, MD, Ph.D. fellow

26 Ellen Leth Løkkegaard, MD, Ph.D.

27 Department of Gynaecology and Obstetrics, Hillerød Hospital<sup>1</sup>

28 Dyrehavevej 29

29 DK-3400 Hillerød

30 (+45) 40 74 13 39

31 [christiane.gam@sund.ku.dk](mailto:christiane.gam@sund.ku.dk)  
32  
33  
34  
35  
36  
37  
38

39 Niels Keiding, professor in biostatistics

40 Julien Tanniou, statistician, Ph.D. fellow

41 Department of Biostatistics, University of Copenhagen<sup>2</sup>

42 Øster Farimagsgade 5,

43 P.O.B. 2099

44 DK-1014 Copenhagen K  
45  
46  
47  
48  
49

50 *Keywords:* distribution, births, model, Poisson, **staffing**, obstetric clinic

51 *Word count:* **2427**  
52  
53  
54  
55  
56  
57  
58  
59  
60

## ABSTRACT

*Objective:* To test whether the relatively unpredictable nature of labour onset can be described by the Poisson distribution.

*Design:* A descriptive retrospective study.

*Setting:* From the Danish Birth Registry we identified births from all seven obstetric clinics in the Capital region of Denmark (n=211,290) between 2000 and the end of 2009. On each date the number of births at each department was registered. Births are categorised in whether an elective Caesarean section or induction of labour has been performed and among the remaining 'non-elective births' acute Caesareans were registered.

*Methods:* After exclusion of elective Caesarean sections and births after induction of labour only 'non-elective' births (n=171,009) were included for the main statistical analysis. Simple descriptive plots and one-way analysis of variance were used to analyse the distribution of 'non-elective' births for each day of the week.

*Main outcome measures:* The daily number of 'non-elective' births.

*Results:* The number of 'non-elective' births varies considerably over the days of the week and over the year for each obstetric clinic regardless of clinic size. However, for each fixed day of the week the variation over the year is well described by a Poisson distribution, allowing simple prediction of the variability. For births at each fixed day of the week, the Poisson distribution is indistinguishable from a normal distribution.

*Conclusion:* The number of 'non-elective' births for each day of the week is well-described by a Poisson distribution. Consequently the Poisson model is suitable for estimating the variation in the daily number of 'non-elective' births and could be used for planning of **staffing** in obstetric clinics. The model can be used in smaller as well as larger clinics.



## ARTICLE SUMMARY

*Article focus:* Does the Poisson distribution correspond precisely to actual random variation in the number of 'non-elective' births for each fixed day of the week?

*Key Message box:*

- For each day of the week, the variation of 'non-elective' births over the year is well described by a Poisson distribution.
- The Poisson distribution makes it easy to estimate the variation in the daily number of births and can be used for planning of **staffing** in obstetric clinics. Standard tables of the normal distribution may be used as exemplified.
- The model is adequate for use in smaller as well as larger clinics and can be used in management of **staffing** in obstetric clinics.

*Strengths and limitations of this study:* The main strength is the large dataset of non-selected births. The main limitation is that births are registered only by date, not by time of birth.

## INTRODUCTION

There is a structural reorganization of hospitals going on in Denmark implying larger but fewer hospitals. This applies also for the departments of Gynaecology and Obstetrics as smaller departments are being merged resulting in fewer larger departments (1-3). The main motivation for these changes has been that larger departments would enhance the capacity and quality of patient treatment and additionally reduce the costs for staff at shifts. In Denmark the overall year to year variation in number of births at each department is centrally determined as each department of **Gynaecology and Obstetrics** on an administrative level is intended to have a given number of births from a specified geographical region **and therefore the staffing required in each obstetric clinic in each department is determined from this figure.**

The largest part of **staffing** consists of a daily number of midwives working eight hours shift during day, evening and night, as well as a varying number of midwives on 24 hour duty on call from home. Their actual working hours vary considerably. The number of doctors on shift is fixed for each obstetric clinic and depends on the size of the obstetric clinic, as does the number of doctors on call from home.

An interesting organizational feature in obstetrics is the inherent random variation in onset of spontaneous labour which makes it difficult to precisely plan the necessary number of staff at the obstetric clinics. The planning of **staffing** in the departments is to our knowledge not based on published methods. Statistics on the number of births on each day for each department every year is available online from Statistics Denmark (4). These numbers indicate considerable day to day variation and week to week variation. The observation of a weekly cycle is in accordance with reports from other countries such as England, Wales, Australia, the United States, Israel and Norway (5-13) and interestingly it has also been shown that the variation depends on whether the Sabbath occurs on a Friday (14), a Saturday (5) or Sunday (6-13). However these former studies included all births regardless of whether or not there had been an elective obstetric intervention, which raises the question whether the variation between the days of the week disappears, when births resulting from an elective obstetric intervention as elective Caesarean or induction of labour are excluded from the data set. There is a long tradition of describing the variation in the daily demand for hospital beds by the Poisson distribution (15-17) sometimes based on queuing theory and with varying efforts at empirical verification. In her well-known textbook Kirkwood (18) used an apparently hypothetical example of **staffing** planning in the face of merging two obstetrical departments to illustrate the Poisson distribution.

In this study we examine from a broad Danish experience how well the Poisson distribution corresponds to actual random variation in the number of 'non-elective' births for each fixed day of the week. Since the variation in the 'non-elective' births is most obviously random, we exclude in the main analysis 'elective' births (resulting from induction of labour and elective Caesarean sections). However, as a sensitivity analysis we report results on the variation of all births and of acute Caesarean sections.

## MATERIAL AND METHODS

### *Data*

The number of births for each date in the period from the 1<sup>st</sup> of January 2000 until the 31<sup>st</sup> of December 2009 at all seven obstetric clinics in the capital region of Denmark were extracted from the Danish Birth registry. The obstetric clinics were Rigshospitalet, Frederiksberg, Glostrup, Gentofte, Herlev, Hvidovre and Hillerød, which cover over 99% of all births in the region, as a dwindling number of births takes place at home in Denmark. The data included information on the type of birth: elective Caesarean sections, births after elective induction of labour, acute Caesarean sections and births after spontaneous onset of labour. The labelling of the type of birth has been done by using information from the National Birth registry on operation codes for elective Caesarean sections (KMCA10B and D) and obstetric codes for induction of labour (KMAC00 Amniotomy prior to birth, KMAC96A Mechanical catheter induction, BKHD2 Unspecific medical induction, BKHD20 Induction with prostaglandin, BKHD21 Induction with oxytocin) . The coding of birth information is based on information from midwives and is generally considered very valid.

### *Statistical methods*

The main concept of these analyses builds on the empirical fact that even for ‘non-elective’ births there is a non-ignorable variation across the seven days of the week, however for each fixed day of the week the variation across the 52 (53) weeks in a given year may be interpreted as random. We exploit the well-known fact that Poisson distributions are well approximated by normal distributions with the same mean and variance, clearly distinguishable by the Poisson distribution property that the mean equals the variance. In this way the key issue – whether the Poisson distribution is an adequate description – is captured by a one-way analysis of variance comparing the seven days of the week for each of the ten years and each of the seven clinics. The results are illustrated by descriptive graphs and worked examples of possible use in **staffing** planning. Additional sensitivity analyses are performed including all births and acute Caesareans.

### *Details of ethics approval*

An ethical approval for this study was not required. The data used are available online in an anonymous form.

## RESULTS

There were 211,290 births distributed on seven departments in the capital region of Denmark from the 1<sup>st</sup> of January 2000 until the 31<sup>st</sup> of December 2009. In order to exclude potential elective births, births were subdivided into induced or spontaneous labour and elective and acute Caesareans (Table I). Births where the mode of delivery was an elective Caesarean (n=16,325 (7.73 %)) and births initiated by induction of

1  
2  
3 labour (n=23,956 (11.34%)) were excluded from the data set for main analyses, thus leaving a total of  
4 171,009 (80.94%) spontaneous births and acute Caesareans, to be denoted 'non-elective' below.

5  
6 As mentioned in the introduction a main problem in obstetrics management is the variation over days of  
7 the week. This variation is to a large degree a result of decisions by the obstetricians on how to distribute  
8 elective Caesareans and electively induced labour over the days of the week (6, 12). Preliminary descriptive  
9 analyses of the data clearly indicated that such policies varied considerably over the ten years for each  
10 department and that the patterns were rather different between departments, however overall a mid-  
11 weekly peak in births remained even when 'elective' births were excluded (please see the supplementary  
12 file, Figure III-IX). The **staffing** required for these 'elective' births is a consequence of management  
13 decisions, and our focus is here on how to capture the primarily random variation in the 'non-elective'  
14 births. Because of the strong heterogeneity in the day-to-day pattern for several of the involved  
15 departments over the ten years under study, we performed a set of 70 one-way analyses of variance  
16 comparing the number of 'non-elective' births at each day of the week for each fixed combination of  
17 department (n=7) and year (n=10). The residual variances from these 70 analyses were compared to the  
18 annual mean number of births for each department. Additional sensitivity analyses were performed  
19 including all births and acute Caesareans. As seen in Figure I, the residual variances are very close to the  
20 means, indicating a Poisson distribution of the variation in number of 'non-elective' births for each day of  
21 the week around the yearly average for that day. We also see that the closeness of residual variance to the  
22 mean improves when we only look at the 'non-elective' births while for the acute Caesareans only there is  
23 a clear trend that the variance is larger than the mean, so-called overdispersion which violates the  
24 assumption of Poisson distribution. In view of these findings we focus on the non-elective births in the  
25 following.

26  
27 To illustrate our findings three selected combinations of department and year, a small, medium and large  
28 clinic, were chosen. For each day of the week a histogram shows the observed distribution of the 52 (53)  
29 numbers of births per day for that year with fitted normal distribution (red) and fitted Poisson distribution  
30 was produced (green) (Figure II). It is seen that there is a nice fit throughout of the Poisson distributions,  
31 and also that they are very close to the normal distributions with the same variance. This means that  
32 calculations of the likely variation in number of 'non-elective' births can be based on the normal  
33 distribution with variance given by the average number of 'non-elective' births per day over the year.

34  
35 For example, if at a particular department in a particular year the mean number of 'non-elective' births is 9,  
36 the residual variance is estimated to be 9 and the standard deviation as the square root of 9, that is, 3.  
37 Assume that the mean number of 'non-elective' births on Tuesdays for that department for that year is  
38 10.5. In 95% of Tuesdays the actual number of 'non-elective births' at that department will be in the  
39 interval between  $10.5 - 3 \times 1.96 = 4.6$  and  $10.5 + 3 \times 1.96 = 17.4$ , while in 80% of Tuesdays there will be  
40  
41  
42  
43  
44  
45  
46  
47  
48  
49  
50  
51  
52  
53  
54  
55  
56  
57  
58  
59  
60

1  
2  
3 between  $10.5 - 3 \times 1.28 = 6.7$  and  $10.5 + 3 \times 1.28 = 14.3$  non-elective births. This model is suitable for  
4 estimating daily number of births and planning of **staffing** in obstetric clinics and the model is adequate to  
5 be used in smaller as well as larger clinics.  
6  
7

#### 8 9 DISCUSSION

10 Management of **staffing** in obstetric clinics is a difficult task, due to the relatively unpredictable nature of  
11 labour onset. Nowadays many births are 'elective' births in the sense that elective Caesarean sections or  
12 medically induced labour more or less governs the time of the week where the birth happens. It has been  
13 assumed that the day to day variation on numbers of births fits a Poisson distribution (13, 18), but suitable  
14 data on live births, including mode of delivery, from a larger population has not previously been studied,  
15 thus limiting the means of studying day to day variation (7, 13). Furthermore the impact of elective  
16 obstetric intervention on the distribution has not been considered in any of the previous studies addressing  
17 birth variation (5-14, 19).  
18  
19

20 Interestingly we find that even with the exclusion of births resulting from an obstetric intervention as  
21 elective caesarean or induction of labour, the remaining data still show significant weekly variation with a  
22 mid-weekly peak. As such this variation might not only be ascribed to measurable obstetric interventions,  
23 but also less tangible practices, for instance the time of admittance of a woman in early stages of labour  
24 might depend on staff numbers which vary during the week. Also traditional non-medical methods of  
25 starting labour (hot baths, sexual intercourse, etc.) might be less likely to be tried by mothers in the  
26 weekends (7).  
27  
28

29 However regardless of any obstetric practices or mothers practice, we found that the distribution of the  
30 remaining 'non-elective' births for each day of the week, each year, and each department is still well  
31 approximated by a Poisson distribution, where the mean equals the variance. For the relevant parameter  
32 values, this Poisson distribution is indistinguishable from a normal distribution, where we then may  
33 estimate the variance from the mean. This means that calculations of the likely variation in number of non-  
34 elective births can be based on the normal distribution with variance given by the average number of non-  
35 elective births per day over the year.  
36  
37

38 This provides us with a useful tool for planning of the **staffing** necessary to handle all births on a given  
39 weekday in an obstetric clinic. Elective Caesarean sections are usually planned to be performed on specific  
40 weekdays with staff dedicated to this task. Births after induction of labour will also in most regards be  
41 planned. Combining the known number of elective births with the calculation of a 95% or 80% confidence  
42 interval of 'non-elective' births on a given week day gives a good possibility to avoid **over- or understaffing**  
43 and utilize the available human resources to their best. For larger clinics where the mean number of non-  
44 elective births for a given weekday may vary by more than 1-2 births, the relocation of staffing to 'peak'  
45  
46  
47  
48  
49  
50  
51  
52  
53  
54  
55  
56  
57  
58  
59  
60

1  
2  
3 weekdays has the most to offer, but even smaller clinics can benefit from more concrete calculation, for  
4 example on how weekend **staffing** should be.

5  
6 The fact that the distribution of 'non-elective' births is indistinguishable from normal distribution provides a  
7 simple, but elegant, tool for planning of staffing in obstetric clinics and used wisely may prove a positive  
8 adjustment for work efficiency, cost and environment.  
9  
10

#### 11 12 CONCLUSIONS

13  
14 We may estimate the variance from the mean, as the Poisson distribution for these parameters is  
15 indistinguishable from a normal distribution. This model is suitable for estimating the variation in the daily  
16 number of 'non-elective' births and could be used for planning of **staffing** in obstetric clinics.  
17  
18

#### 19 20 COMPETING INTEREST

21  
22 All authors have completed the Unified Competing Interest form at  
23 [http://www.icmje.org/coi\\_disclosure.pdf](http://www.icmje.org/coi_disclosure.pdf) (available on request from the corresponding author) and  
24 declare: no support from any organization for the submitted work, no financial relationships with any  
25 organization that might have an interest in the submitted work in the previous three, no other relationships  
26 or activities that could appear to have influenced the submitted work.  
27  
28  
29

#### 30 31 FUNDING

32  
33 This research received no specific grant from any funding agency in the public, commercial or not-for-profit  
34 sectors.  
35  
36

#### 37 38 CONTRIBUTION TO AUTHORSHIP

39  
40 CMG, NK, JT and EL have all been involved in the conception of this study. The statistical analysis has been  
41 carried out mainly by JT under the guidance of NK, EL and CMG. The writing of this article has been done by  
42 CMG, NK, JT and EL. Coordination of the correspondence between authors has been taken care of by CMG.  
43  
44  
45  
46  
47  
48  
49  
50  
51  
52  
53

#### 54 55 REFERENCES

56  
57 1. Sygehusfødsler og fødeafdelingernes størrelse 1982-2005. Nye tal fra Sundhedsstyrelsen  
58 [Hospital births and size at birth departments 1982-2005. New figures from the Danish Health and  
59  
60

- 1  
2  
3 Medicines Auhtority]. Copenhagen. Danish Health and Medicines Authority; 2007. Available from:  
4 [http://www.sst.dk/publ/tidsskrifter/nyetal/pdf/2007/03\\_07.pdf](http://www.sst.dk/publ/tidsskrifter/nyetal/pdf/2007/03_07.pdf). Danish.
- 5 2. Sygehusbehandling og Beredskab. Specialevejledning for gynækologi og obstetrik [Hospital  
6 and Emergency Management. Guidelines for the speciality of gynecology and obstetrics] [database on the  
7 Internet]. Danish Health and Medicines Authority. 2011. Available from:  
8 [http://www.google.dk/url?sa=t&rct=j&q=&esrc=s&frm=1&source=web&cd=1&cad=rja&ved=OCC0QFjAA&url=http%3A%2F%2Fwww.sst.dk%2F~%2Fmedia%2FPlanlaegning%2520og%2520kvalitet%2FSpecialeplanlaegning%2FSpecialevejledninger\\_2010%2FSpecialevejledning\\_%2520gynaekologi\\_obstetrik.ashx&ei=HN5BUe3YLMWXO8vkgNgN&usg=AFQjCNHwTAn\\_VjRByL74GQSAq-mmLD4XYQ&sig2=Dgizs6-smdvyJnCuAnGtZw](http://www.google.dk/url?sa=t&rct=j&q=&esrc=s&frm=1&source=web&cd=1&cad=rja&ved=OCC0QFjAA&url=http%3A%2F%2Fwww.sst.dk%2F~%2Fmedia%2FPlanlaegning%2520og%2520kvalitet%2FSpecialeplanlaegning%2FSpecialevejledninger_2010%2FSpecialevejledning_%2520gynaekologi_obstetrik.ashx&ei=HN5BUe3YLMWXO8vkgNgN&usg=AFQjCNHwTAn_VjRByL74GQSAq-mmLD4XYQ&sig2=Dgizs6-smdvyJnCuAnGtZw).  
9 Danish.
- 10 3. Tal og analyse: Fødselsstatistikken 2011 [Numbers and analysis: Birthstatistics 2011].  
11 Copenhagen. Danish Health and Medicines Authority; 2012. Available from:  
12 <http://www.sst.dk/publ/Publ2012/03mar/Foedselsstatistik2011.pdf>. Danish.
- 13 4. Fødsler 1973- [Births 1973-] [database on the Internet]. Danish Health and Medicines  
14 Authority. Available from:  
15 <http://www.ssi.dk/Sundhedsdataogit/Dataformidling/Sundhedsdata/Fodsler/Fodsler%201973.aspx>.  
16 Danish.
- 17 5. Cohen A. Seasonal daily effect on the number of births in Israel. *J R Stat Soc Ser C Appl Stat.*  
18 1983;32(3):228-35.
- 19 6. Curtin SC, Park MM. Trends in the attendant, place, and timing of births, and in the use of  
20 obstetric interventions: United States, 1989-97. *Natl Vital Stat Rep.* 1999;47(27):1-12.
- 21 7. MacFarlane A. Variations in number of births and perinatal mortality by day of week in  
22 England and Wales. *Br Med J.* 1978;2(6153):1670-3.
- 23 8. Martins JM. Never on Sundays. *Med J Aust.* 1972;1(10):487-8.
- 24 9. Menaker W, Menaker A. Lunar periodicity in human reproduction: a likely unit of biological  
25 time. *Am J Obstet Gynecol.* 1959;77(4):905-14.
- 26 10. Odegard O. Season of birth in the population of Norway, with particular reference to the  
27 September birth maximum. *Br J Psychiatry.* 1977;131:339-44.
- 28 11. Borst LB, Osley M. Letter: Holiday effects upon natality. *Am J Obstet Gynecol.*  
29 1975;122(7):902-3.
- 30 12. Rindfuss RR, Ladinsky JL, Coppock E, Marshall VW, Macpherson AS. Convenience and the  
31 occurrence of births: induction of labor in the United States and Canada. *Int J Health Serv.* 1979;9(3):439-  
32 60.
- 33 13. Hawe E, MacFarlane A. Daily and seasonal variation in live births, stillbirths and infant  
34 mortality in England and Wales, 1979-96. *Health Statistics Quarterly.* 2001;(9):5-15.
- 35 14. Osley M, Summerville D, Borst LB. Natality and the moon. *Am J Obstet Gynecol.*  
36 1973;117(3):413-5.
- 37 15. Huang XM. A planning model for requirement of emergency beds. *IMA J Math Appl Med Biol.*  
38 1995;12(3-4):345-53.
- 39 16. Kao EP, Tung GG. Bed allocation in a public health care delivery system. *Management*  
40 *Science.* 1981;27(5):507-20.
- 41 17. Pike MC, Proctor DM, Wyllie JM. Analysis of Admissions to a Casualty Ward. *Br J Prev Soc*  
42 *Med.* 1963;17:172-6.
- 43 18. Kirkwood BR. The Poisson Distribution. *Essentials of Medical Statistics: Blackwell Science;*  
44 1988. p. 125-7.
- 45 19. Fallenstein F, Haener W, Huch A, Huch R. The influence of the moon on deliveries. *Am J*  
46 *Obstet Gynecol.* 1984;148(1):119-20.
- 47  
48  
49  
50  
51  
52  
53  
54  
55  
56  
57  
58  
59  
60
